# Supplementary material for: Profiling of the Prognostic Role of Extracellular Matrix-Related Genes in Neuroblastoma Using Databases and Integrated Bioinformatics
Source: MDPI journal article supplement (doi:10.3390/onco2020007), 2022-05-19
Supplement: s1 [file s1]

Archive with 2 entries (2 files):
- onco-1705424- supplementary figure S1.pdf
- Supplementary file.xlsx
