# Supplementary material for: Profiling of the Prognostic Role of Extracellular Matrix-Related Genes in Neuroblastoma Using Databases and Integrated Bioinformatics
Source: MDPI journal article supplement (doi:10.3390/onco2020007), 2022-05-19
Supplement: s1 [file s1 › Supplementary file.xlsx]

## Sheet: S1-Genomic alterations
The interrogation of the genetic alteration profile, the percentage of patients upregulating the 964 ECM-related genes in NB and the hierarchical clustering of most of the 964 ECM-related genes based on TARGET-NBL expression data in PCAT
Gene list	Percent of patients with higher expression levels of this gene (%) compared to their non-expressing NB patient counterparts	Alterations per patient (%)	Alterations						key for mutations in columns 4+				TARGET-NBL expression dataset in PCAT hierarchical clustering of most of the 964 ECM genes based on NB patient disease stage (II, III, IV, IVs)
A1BG	1.4	0								amplification
A2M	6	0.003	A2M AMPLIFIED (TARGET-30-PASAZJ)	A2M E442K (TARGET-30-PALFPI)	A2M T730S, A2M T871N (TARGET-30-PANUIF)	A2M A1201T (TARGET-30-PAPPKJ)				missence mutation (unknown significance)
ABAT	4	0								missence mutation (putative driver)
ABI3BP	5	0.1	ABI3BP T566S (TARGET-30-PASTCN)							truncating mutation (unknown significance)
ABL1	4	0.1	ABL1 AMPLIFIED (TARGET-30-PARFBW)							truncating mutation (putative driver)
ACAA1	4	0.1	ACAA1 Q199K (TARGET-30-PATHVK)							deletion
ACAN	2.9	0.1	ACAN A248T (TARGET-30-PAPYNZ)	ACAN E1848* (TARGET-30-PAKZRE)						inframe mutation
ACAT1	4	0.2	ACAT1 HOMODELETED (TARGET-30-PADIEY)	ACAT1 HOMODELETED (TARGET-30-PADLPR)	ACAT1 HOMODELETED (TARGET-30-PARIKT)					fusion
ACHE	2.9	0								Splice mutation (unknown significance)
ACOT11	6	0								splice mutation (potential driver)
ACR	5	0								structural variant
ACSM1	4	0.1	ACSM1 W380L (TARGET-30-PALWIP)	ACSM1 V398I (TARGET-30-PAMZMG)
ACTG1	6	0.3	ACTG1 AMPLIFIED (TARGET-30-PADSEC)	ACTG1 AMPLIFIED (TARGET-30-PAKAFK)	ACTG1 AMPLIFIED (TARGET-30-PACRYY)	ACTG1 AMPLIFIED (TARGET-30-PARIKT)	ACTG1 AMPLIFIED (TARGET-30-PARUXY)
ACTN1	2.2	0.1	ACTN1 HOMODELETED (TARGET-30-PARSEA)	ACTN1 R816G (TARGET-30-PASYLD)
ACTN2	4	0.1	ACTN2 HOMODELETED (TARGET-30-PASJYB)	ACTN2 E533K (TARGET-30-PALAKE)
ACTN3	4	0.2	ACTN3 AMPLIFIED (TARGET-30-PADSEC)	ACTN3 AMPLIFIED (TARGET-30-PAKAFK)	ACTN3 AMPLIFIED (TARGET-30-PARGUX)
ADAM10	5	0
ADAM11	4	0.1	ADAM11 AMPLIFIED (TARGET-30-PARGUX)	ADAM11 AMPLIFIED (TARGET-30-PALJVX)
ADAM12	4	0
ADAM15	5	0
ADAM19	6	0
ADAM8	4	0
ADAM9	2.9	0
ADAMDEC1	6	0
ADAMTS1	6	0.1	ADAMTS1 HOMODELETED (TARGET-30-PARACM)
ADAMTS10	4	0.1	ADAMTS10 G308W (N160)
ADAMTS12	5	0.2	ADAMTS12 F1384L (TARGET-30-PAHYWC)	ADAMTS12 R1395Q (TARGET-30-PAISSH)	ADAMTS12 V1002A (TARGET-30-PALAKM)
ADAMTS13	4	0.1	ADAMTS13 AMPLIFIED (TARGET-30-PARFBW)	ADAMTS13 A891F (NBL50)
ADAMTS14	2.9	0.1	ADAMTS14 C904* (N608)
ADAMTS15	6	0
ADAMTS16	2.9	0.1	ADAMTS16 AMPLIFIED (TARGET-30-PARNCW)
ADAMTS17	4	0.1	ADAMTS17 HOMODELETED (TARGET-30-PARXZR)	ADAMTS17 Q815* (TARGET-30-PASCLP)
ADAMTS18	5	0
ADAMTS19	2.9	0
ADAMTS2	4	0.1	ADAMTS2 HOMODELETED (TARGET-30-PARRBU)
ADAMTS20	2.9	0.1	ADAMTS20 T792R (TARGET-30-PARAMT)
ADAMTS3	4	0.1	ADAMTS3 H402N (NBL48)
ADAMTS4	4	0
ADAMTS5	4	0.2	ADAMTS5 HOMODELETED (TARGET-30-PARACM)	ADAMTS5 W173L (NBL07)	ADAMTS5 G710S (TARGET-30-PAPHPE)
ADAMTS6	4	0.1	ADAMTS6 X310_splice (TARGET-30-PASXHE)	ADAMTS6 R1011H (TARGET-30-PARGZK)
ADAMTS7	4	0.3	ADAMTS7 E138Gfs*15 (TARGET-30-PAIFCS)	ADAMTS7 L864P (TARGET-30-PALUDH)	ADAMTS7 I1660V (TARGET-30-PASSRN)	ADAMTS7 E1051K (TARGET-30-PATDXC)
ADAMTS8	5	0
ADAMTS9	4	0
ADAMTSL1	5	0.2	ADAMTSL1 R1162H (TARGET-30-PALXMM)	ADAMTSL1 G234V (ARGET-30-PASSWB)	ADAMTSL1 S1026F (TARGET-30-PASXGP)
ADAMTSL2	6	0.1	ADAMTSL2 AMPLIFIED (TARGET-30-PARFBW)
ADAMTSL3	6	0
ADAMTSL4	5	0
ADAMTSL5	2.5	0.1	ADAMTSL5 G250V (TARGET-30-PAPPKJ)
ADGRG1	4	0
ADGRG6	5	0
ADIPOQ	2.9	0
ADTRP	5	0.1	ADTRP I185L (TARGET-30-PASMNT)
AEBP1	4	0
AGRN	2.9	0.3	AGRN HOMODELETED (TARGET-30-PARRBU)	AGRN HOMODELETED (TARGET-30-PARXLM)	AGRN HOMODELETED (TARGET-30-PASDZJ)	AGRN R1696Q (NBL43)
AGT	2.2	0.1	AGT P71T (TARGET-30-PARKAG)
AHCTF1	6	0.1	AHCTF1 R448S (TARGET-30-PAPNEP)	AHCTF1 C1637S (TARGET-30-PASAZJ)
AHSG	1.4	0
ALDH1L2	6	0
ALDH2	2.2	0
ALDH7A1	5	0.1	ALDH7A1 L187M (TARGET-30-PASWIJ)
ALOX5	4	0
ALPL	4	0.1	ALPL HOMODELETED (TARGET-30-PACUGP)	ALPL HOMODELETED (TARGET-30-PARRBU)
AMBN	2.2	0
AMBP	1.4	0
AMELX	0.7	0.1	AMELX Q78K (TARGET-30-PAPUWY)
AMELY	0	0
AMTN	1.4	0.1	AMTN Q191E (TARGET-30-PALHVD)	AMTN Q149* (N607)
ANG	1.4	0.1	ANG P112L (NBL39)
ANGPT1	6	0
ANGPT2	6	0
ANGPT4	6	0
ANGPTL2	4	0.1	ANGPTL2 AMPLIFIED (TARGET-30-PARFBW)
ANGPTL5	1.4	0.2	ANGPTL5 HOMODELETED (TARGET-30-PADIEY)	ANGPTL5 HOMODELETED (TARGET-30-PADLPR)	ANGPTL5 HOMODELETED (TARGET-30-PARIKT)
ANGPTL1	5
ANGPTL3	1.4	0.1	ANGPTL3 HOMODELETED (TARGET-30-PARJTB)
ANGPTL4	6	0.1	ANGPTL4 L304H (NBL08)
ANGPTL6	6	0
ANGPTL7	2.9	0.2	ANGPTL7 HOMODELETED (TARGET-30-PACUGP)	ANGPTL7 HOMODELETED (TARGET-30-PARRBU)	ANGPTL7 HOMODELETED (TARGET-30-PARXLM)
ANOS1	7	0
ANTXR1	4	0
ANXA1	5	0
ANXA11	6	0
ANXA2	6	0
ANXA2P2	0	0
ANXA4	4	0
ANXA5	6	0.1	ANXA5 AMPLIFIED (TARGET-30-PARDUJ)
ANXA6	5	0.1	ANXA6 A426V (TARGET-30-PAPPKJ)
ANXA7	7	0.1	ANXA7 HOMODELETED (TARGET-30-PAKADI)
ANXA8	0	0
APBB2	2.9	0
APCS	1.4	0
APLP1	2.9	0
APOA1	1.4	0
APOA4	1.4	0
APOC3	1.4	0
APOD	0	0
APOE	2.2	0
APOH	1.4	0.1	APOH AMPLIFIED (TARGET-30-PADSEC)	APOH AMPLIFIED (TARGET-30-PARGUX)
APP	5	0.1	APP HOMODELETED (TARGET-30-PARACM)
ARL2	4	0.3	ARL2 AMPLIFIED (TARGET-30-PARGUX)	ARL2 AMPLIFIED (TARGET-30-PADSEC)	ARL2 AMPLIFIED (TARGET-30-PAKAFK)	ARL2 S83N (TARGET-30-PASNEF)
ARL2BP	5	0
ASPN	2.9	0
ATP5F1A	4	0
ATP5F1B	4	0
ATP7A	4	0.1	ATP7A HOMODELETED (TARGET-30-PARHYL)
ATRN	5	0
ATRNL1	4	0
ATXN1L	4	0
AZGP1	1.4	0.1	AZGP1 G258R (TARGET-30-PAPTLA)
B4GALT1	4	0
BASP1	5	0.1	BASP1 AMPLIFIED (TARGET-30-PARNCW)
BAX	5	0
BCAM	6	0
BCAN	1.4	0.1	BCAN E385_T386delinsDS (TARGET-30-PASEGA)	BCAN R280W (TARGET-30-PAPBGH)
BCAS3	6	0.1	BCAS3 AMPLIFIED (TARGET-30-PARGUX)	BCAS3-ATG2A, Fusion, Event Info: ATG2A-BCAS3 fusion (TARGET-30-PARGUX)
BCKDHB	2.9	0
BCL2	5	0
BCR	6	0
BGN	2.2	0.1	BGN HOMODELETED (TARGET-30-PASJYB)
BLOC1S1	5	0
BMP1	2.9	0.1	BMP1 F808L (TARGET-30-PATBMM)
BMP2	2.9	0
BMP7	5	0.1	BMP7 H384S (TARGET-30-PAICGF)
BMPER	4	0.1	BMPER T570P (TARGET-30-PASEGA)	BMPER S479I (TARGET-30-PALHVD)
BSG	5	0
BST1	6	0.1	BST1 HOMODELETED (TARGET-30-PARAHE)
BTD	4	0
C17orf58	4	0.1	C17ORF58 AMPLIFIED (TARGET-30-PADSEC)	C17ORF58 AMPLIFIED (TARGET-30-PARIKT)
C1QA	6	0.1	C1QA HOMODELETED (TARGET-30-PARRBU)	C1QA G37* (N711)
C1QB	6	0.1	C1QB HOMODELETED (TARGET-30-PARRBU)
C1QBP	6	0
C1QC	5	0.1	C1QC HOMODELETED (TARGET-30-PARRBU)
C6orf15	0	0
CAD	4	0.1	CAD AMPLIFIED (TARGET-30-PARFBW)
CALR	6	0
CAPN1	2.9	0.3	CAPN1 AMPLIFIED (TARGET-30-PARGUX)	CAPN1 AMPLIFIED (TARGET-30-PADSEC)	CAPN1 AMPLIFIED (TARGET-30-PAKAFK)	CAPN1 X706_splice (TARGET-30-PATFIN)
CAPN2	5	0
CAPNS1	8	0
CAPNS2	5	0
CARMIL2	6	0
CASK	4	0
CAT	6	0
CAV1	6	0.1	CAV1 D67Y (TARGET-30-PAPTJB)
CAV2	2.9	0
CBLN1	5	0
CBLN4	4	0
CCBE1	4	0
CCDC80	2.9	0
CCL21	9	0
CCL25	0.7	0
CCL28	4	0
CCN1	6	0.1	CCN1 HOMODELETED (TARGET-30-PAPZYP)	CCN1 HOMODELETED (TARGET-30-PARJTB)
CCN2	4	0.1	CCN2 Y182H (TARGET-30-PASWIJ)
CCN3	0.7	0
CCN4	4	0
CCN5	4	0
CCN6	4	0
CD151	4	0.1	CD151 AMPLIFIED (TARGET-30-PAAPFA)	CD151 AMPLIFIED (TARGET-30-PACRYY)
CD180	4	0
CD200	4	0
CD248	6	0.2	CD248 AMPLIFIED (TARGET-30-PARGUX)	CD248 AMPLIFIED (TARGET-30-PADSEC)	CD248 AMPLIFIED (TARGET-30-PAKAFK)
CD34	6	0
CD36	5	0
CD3E	5	0
CD4	6	0.1	CD4 AMPLIFIED (TARGET-30-PASAZJ)	CD4 P158S (TARGET-30-PASGUT)
CD44	4	0
CD47	5	0
CD63	4	0
CDH1	4	0
CDH13	2.9	0.1	CDH13, Fusion, Event Info: SV (TARGET-30-PAPTLD)	CDH13 V474F (NBL39)
CDH2	2.9	0
CDK1	4	0
CDON	4	0
CEACAM6	4	0.1	CEACAM6 E283D (NBL61)
CER1	5	0
CFL1	0.7	0.2	CFL1 AMPLIFIED (TARGET-30-PARGUX)	CFL1 AMPLIFIED (TARGET-30-PADSEC)	CFL1 AMPLIFIED (TARGET-30-PAKAFK)
CFL2	4	0
CFLAR	4	0.1	CFLAR HOMODELETED (TARGET-30-PASAZJ)
CFP	6	0
CHAD	1.4	0.1	CHAD AMPLIFIED (TARGET-30-PARGUX)	CHAD AMPLIFIED (TARGET-30-PALJVX)
CHADL	6	0
CHI3L1	1.4	0
CHMP1A	5	0.1	CHMP1A HOMODELETED (TARGET-30-PARABN)	CHMP1A HOMODELETED (TARGET-30-PASCUF)
CIB1	6	0
CILP	4	0
CLASP1	5	0.1	CLASP1 G661Afs*50 (TARGET-30-PASXGP)
CLASP2	6	0.1	CLASP2 R834K (TARGET-30-PAISSH)
CLC	4	0
CLEC14A	4	0
CLEC3B	5	0
CLIC4	5	0.1	CLIC4 HOMODELETED (ARGET-30-PARRBU)	CLIC4 HOMODELETED (TARGET-30-PACUGP)
CLU	5	0
CMA1	4	0
COASY	4	0.1	COASY AMPLIFIED (TARGET-30-PARGUX)	COASY AMPLIFIED (TARGET-30-PALJVX)
COCH	4	0
COL10A1	4	0
COL11A1	2.2	0.3	COL11A1 HOMODELETED (TARGET-30-PARJTB)	COL11A1 L1202Cfs*70 (TARGET-30-PATBMM)	COL11A1 P533L (TARGET-30-PARMLF)	COL11A1 M792I (TARGET-30-PARBGP)
COL11A2	4	0.1	COL11A2 R1427W (TARGET-30-PARMLF)
COL12A1	2.2	0.3	COL12A1 T978N (TARGET-30-PARBGP)	COL12A1 Y3043* (TARGET-30-PANYBL)	COL12A1 S1618R (ARGET-30-PATXHT)	COL12A1 E1616D (TARGET-30-PATZRU)
COL13A1	4	0
COL14A1	6	0.3	COL14A1 G1716Wfs*45 (NBL01)	COL14A1 G269E (TARGET-30-PASTKC)	COL14A1 A84E (N599)	COL14A1 P557Q (TARGET-30-PAPREJ)
COL15A1	6	0.1	COL15A1 M677I (TARGET-30-PATEPF)
COL16A1	2.9	0.1	COL16A1 AMPLIFIED (TARGET-30-PARUXY)	COL16A1 HOMODELETED (TARGET-30-PARRBU)
COL17A1	5	0.1	COL17A1 N1242Tfs*9 (TARGET-30-PAKZRE)
COL18A1	8	0
COL19A1	1.4	0
COL1A1	0	0.3	COL1A1 AMPLIFIED (TARGET-30-PARGUX)	COL1A1 AMPLIFIED (TARGET-30-PALJVX)	COL1A1 G1163R (TARGET-30-PALHVD)	COL1A1 P774T (TARGET-30-PATDXG)
COL1A2	0	0
COL20A1	4	0.1	COL20A1 S189R (TARGET-30-PARHUX)
COL21A1	6	0
COL22A1	5	0.1	COL22A1 G976A (NBL01)	COL22A1 AMPLIFIED (TARGET-30-PARUXY)
COL23A1	4	0.1	COL23A1 HOMODELETED (TARGET-30-PARRBU)
COL24A1	4	0.1	COL24A1 HOMODELETED (TARGET-30-PARJTB)	COL24A1 HOMODELETED (TARGET-30-PAPZYP)
COL25A1	6	0
COL26A1	4	0
COL27A1	8	0.1	COL27A1 -19fs (TARGET-30-PAICGF)	COL27A1 G1174D (NBL50)
COL28A1	2.2	0.2	COL28A1 HOMODELETED (TARGET-30-PARUXY)	COL28A1 E948* (TARGET-30-PAKHHB)	COL28A1 R149H (TARGET-30-PAPYNZ)
COL2A1	1.4	0.1	COL2A1 X1037_splice (NBL23)
COL3A1	0	0.2	COL3A1 A1124S (TARGET-30-PARMLF)	COL3A1 HOMODELETED (TARGET-30-PASAZJ)	COL3A1 G1089Afs*147 (TARGET-30-PANBSP)
COL4A1	4	0.2	COL4A1 G679V (TARGET-30-PALJPX)	COL4A1 P1313A (TARGET-30-PAPBZI)	COL4A1 R476P (TARGET-30-PARVLK)
COL4A2	4	0
COL4A3	2.2	0.4	COL4A3 HOMODELETED (TARGET-30-PASAZJ)	COL4A3 HOMODELETED (TARGET-30-PAKADI)	COL4A3 HOMODELETED (TARGET-30-PARIKT)	COL4A3 G976W (NBL50)	COL4A3 P1386R (TARGET-30-PAIMDT)	COL4A3 L1111F (TARGET-30-PASGUT)
COL4A4	0.7	0.2	COL4A4 HOMODELETED (TARGET-30-PASAZJ)	COL4A4 HOMODELETED (TARGET-30-PAKADI)	COL4A4 HOMODELETED (TARGET-30-PARIKT)
COL4A5	4	0.1	COL4A5 HOMODELETED (TARGET-30-PASJYB)	COL4A5 P826Q (TARGET-30-PAILNU)
COL4A6	4	0.1	COL4A6 HOMODELETED (TARGET-30-PASJYB)
COL5A1	2.2	0.1	COL5A1 AMPLIFIED (TARGET-30-PARFBW)	COL5A1 G1195R (TARGET-30-PARAMT)
COL5A2	2.9	0.1	COL5A2 HOMODELETED (TARGET-30-PASAZJ)
COL5A3	2.9	0.5	COL5A3 P598= (NBL07)	COL5A3 G854= (NBL48)	COL5A3 X584_splice (TARGET-30-PATCKU)	COL5A3 E561D (TARGET-30-PAKFUY)	COL5A3 I1228M (TARGET-30-PARFWB)	COL5A3 Q138K (TARGET-30-PASTKC)	COL5A3 Q573K (TARGET-30-PATYPH)	COL5A3 G524C (TARGET-30-PAVETV)
COL6A1	2.9	0
COL6A2	2.2	0.1	COL6A2 L87M (TARGET-30-PAVAGS)
COL6A3	2.2	0.5	COL6A3 HOMODELETED (TARGET-30-PAKADI)	COL6A3 HOMODELETED (TARGET-30-PASAZJ)	COL6A3 G72R (TARGET-30-PAPPKJ)	COL6A3 E1212D (TARGET-30-PASYTP)	COL6A3 V2995F (TARGET-30-PATBKX)	COL6A3 Q3085H (TARGET-30-PATXKG)	COL6A3 K2850N, COL6A3 D248Y (TARGET-30-PAUWYM)
COL6A5	4	0
COL6A6	5	0.2	COL6A6 A1867V (TARGET-30-PAPPKJ)	COL6A6 N2183K (TARGET-30-PARHUX)	COL6A6 R847L (TARGET-30-PARZMY)
COL7A1	4	0.1	COL7A1 P2430Qfs*36 (TARGET-30-PAMMWD)
COL8A1	2.9	0
COL8A2	2.2	0.1	COL8A2 HOMODELETED (TARGET-30-PARRBU)	COL8A2 G358Vfs*101 (TARGET-30-PAIPGU)
COL9A1	2.2	0
COL9A2	7	0
COL9A3	8	0
COLEC12	7	0
COLGALT1	4	0
COLQ	1.4	0.1	COLQ X399_splice (TARGET-30-PAREAG)
COMP	2.9	0.1	COMP N625Efs*77 (NBL36)
CPA3	2.2	0
CPB2	2.2	0.1	CPB2 D254Y (TARGET-30-PAPLSD)
CPN2	1.4	0.2	CPN2 AMPLIFIED (TARGET-30-PASLGS)
CPS1	1.4	0.2	CPS1 HOMODELETED (TARGET-30-PASAZJ)	CPS1 M458I (TARGET-30-PALJPX)	CPS1 L731M (TARGET-30-PANUIF)
CREB3L1	2.2	0
CRELD1	5	0
CRISP3	0.7	0.1	CRISP3 G174V (TARGET-30-PASSRS)
CRISPLD2	2.2	0
CRTAP	6	0
CRYM	4	0
CS	5	0
CSF1	7	0.2	CSF1 AMPLIFIED (TARGET-30-PARJTB)	CSF1 A212T (TARGET-30-PALSAE)	CSF1 A453E (TARGET-30-PASRFS)
CSGALNACT1	5	0
CSNK2B	4	0
CSPG4	2.9	0.3	CSPG4 G1910E (TARGET-30-PARGUX)	CSPG4 S359R (TARGET-30-PASJWG)	CSPG4 V656L (TARGET-30-PASPER)	CSPG4 R874C (TARGET-30-PATTPL)
CST3	6	0
CSTB	0	0
CTHRC1	4	0
CTNNB1	6	0
CTRB1	2.9	0
CTRB2	6	0
CTSB	4	0
CTSC	4	0.1	CTSC HOMODELETED (TARGET-30-PADIEY)	CTSC HOMODELETED (TARGET-30-PADLPR)
CTSD	0	0.1	CTSD AMPLIFIED (TARGET-30-PAAPFA)	CTSD AMPLIFIED (TARGET-30-PACRYY)
CTSF	0.7	0.2	CTSF AMPLIFIED (TARGET-30-PADSEC)	CTSF AMPLIFIED (TARGET-30-PAKAFK)	CTSF AMPLIFIED (TARGET-30-PARGUX)
CTSG	2.2	0.2	CTSG R160* (N711)	CTSG R82L (TARGET-30-PANZVU)	CTSG G222E (TARGET-30-PASTKC)
CTSH	5	0
CTSK	2.2	0
CTSL	2.9	0
CTSS	5	0
CTSV	4	0
CTSZ	4	0.1	CTSZ P266Q (TARGET-30-PARVLK)
CX3CL1	5	0
CXCL12	6	0.1	CXCL12 HOMODELETED (TARGET-30-PADPHP)
CYP1B1	7	0.1	CYP1B1 AMPLIFIED (TARGET-30-PARFBW)
DAG1	5	0.1	DAG1 R79* (N161)	DAG1 S712T (N599)
DAND5	4	0
DCN	7	0.1	DCN AMPLIFIED (TARGET-30-PARJTB)
DDR1	0	0
DDR2	8	0
DEFA1	0.7	0
DEFB118	0	0
DGCR6	4	0
DLG1	5	0
DMBT1	2.9	0.1	DMBT1 P2273A (TARGET-30-PARMLF)
DMP1	1.4	0.1	DMP1 P66S (TARGET-30-PAPPKJ)	DMP1 D101V (TARGET-30-PATFCY)
DMTN	5	0
DNAJB6	4	0.1	DNAJB6 HOMODELETED (TARGET-30-PAPZYP)
DNAJC15	5	0
DNMT3A	4	0.1	DNMT3A AMPLIFIED (TARGET-30-PARFBW)
DPP4	4	0.1	DPP4 AMPLIFIED (TARGET-30-PASDZJ)
DPT	0.7	0
DSPP	4	0.1	DSPP E397* (TARGET-30-PASSRS)
DST	6	0.1	DST W3727L (TARGET-30-PANIPC)
ECH1	4	0
ECM1	6	0
ECM2	2.9	0
EDA	4	0.1	EDA HOMODELETED (|ARGET-30-PASJYB)
EDIL3	6	0
EFEMP1	5	0.1	EFEMP1 AMPLIFIED (TARGET-30-PARMTT)
EFEMP2	2.2	0.2	EFEMP2 AMPLIFIED (TARGET-30-PADSEC)	EFEMP2 AMPLIFIED (TARGET-30-PAKAFK)	EFEMP2 AMPLIFIED (TARGET-30-PARGUX)
EFNA5	6	0.1	EFNA5 HOMODELETED (TARGET-30-PADIEY)
EGFL6	2.2	0
EGFL7	4	0.1	EGFL7 AMPLIFIED (TARGET-30-PARFBW)
EGFLAM	5	0
ELANE	0.7	0.1	ELANE R34Pfs*55 (TARGET-30-PALETP)
ELF3	4	0
ELFN1	7	0
ELFN2	2.9	0
ELN	4	0.1	ELN G406V (TARGET-30-PALHVD)
EMID1	4	0
EMILIN1	4	0.1	EMILIN1 AMPLIFIED (TARGET-30-PARFBW)	EMILIN1 AMPLIFIED (TARGET-30-PARUXY)
EMILIN2	4	0.1	EMILIN2 E498Q (NBL07)
EMILIN3	2.9	0
ENAM	2.9	0.1	ENAM T1088M (TARGET-30-PAIFXV)
ENG	6	0.1	ENG AMPLIFIED (TARGET-30-PARFBW)	ENG Q648* (NBL08)
ENTPD2	4	0.1	ENTPD2 AMPLIFIED (TARGET-30-PARFBW)
EPDR1	6	0
EPHA3	4	0.2	EPHA3 A613S (TARGET-30-PALHVD)	EPHA3 K444N (TARGET-30-PARYNK)	EPHA3 A629=Likely Oncogenic (NBL44)
EPHX2	5	0
ERBB4	4	0.1	ERBB4 HOMODELETED (TARGET-30-PASAZJ)	ERBB4 V849I (TARGET-30-PAREGK)
ERBIN	1.4	0
ERCC2	6	0
ERO1A	1.4	0
ERO1B	4	0.1	ERO1B HOMODELETED (TARGET-30-PASJYB)
ETS1	2.9	0.1	ETS1 HOMODELETED (TARGET-30-PADIEY)
EXOC8	5	0
EXT1	5	0
EYS	6	0
F11R	4	0
F12	2.9	0.1	F12 AMPLIFIED (TARGET-30-PARFBW)	F12 HOMODELETED (TARGET-30-PARRBU)
F13A1	5	0.1	F13A1 L554P (N595)
F2	1.4	0
F3	6	0.1	F3 HOMODELETED (TARGET-30-PARJTB)
F7	1.4	0
F9	1.4	0.1	F9 HOMODELETED (TARGET-30-PASJYB)
FABP1	1.4	0
FAM107A	6	0
FAM20A	6	0.1	FAM20A AMPLIFIED (TARGET-30-PADSEC)	FAM20A AMPLIFIED (TARGET-30-PARIKT)
FAM20C	5	0
FAP	6	0.1	FAP AMPLIFIED (TARGET-30-PASDZJ)	FAP S29* (TARGET-30-PASMNT)
FASTKD2	6	0.1	FASTKD2 HOMODELETED
FBLN1	2.9	0
FBLN2	1.4	0.1	FBLN2 A982T (TARGET-30-PAMDAL)
FBLN5	5	0
FBN1	1.4	0.1	FBN1 HOMODELETED (TARGET-30-PASJYB)	FBN1 R457C (TARGET-30-PARGKK)
FBN2	4	0.4	FBN2 G1463* (TARGET-30-PANYBL)	FBN2 Y1841* (TARGET-30-PARDIW)	FBN2 N1327K (N508)	FBN2 L1564M (TARGET-30-PAIVHE)	FBN2 A1820E (TARGET-30-PAPBGH)	FBN2 K1046N (TARGET-30-PASCJJ)
FBN3	7	0.1	FBN3 W2332L (NBL36)
FCGBP	0	0.5	FCGBP D982Y (TARGET-30-PASCLP)	FCGBP H375N (NBL04)	FCGBP P5118L (N561)	FCGBP V2814A (TARGET-30-PAIXNV)	FCGBP C1619Y (TARGET-30-PARDCK)	FCGBP C455F (TARGET-30-PASEYW)	FCGBP V2814A (TARGET-30-PASSRN)
FCN1	6	0.1	FCN1 AMPLIFIED (TARGET-30-PARFBW)
FCN2	1.4	0.1	FCN2 AMPLIFIED (TARGET-30-PARFBW)
FCN3	4	0.1	FCN3 HOMODELETED (TARGET-30-PARRBU)
FER	7	0.1	FER HOMODELETED (TARGET-30-PADIEY)
FERMT1	2.2	0
FERMT3	4	0.1	FERMT3 AMPLIFIED (TARGET-30-PADSEC)	FERMT3 AMPLIFIED (TARGET-30-PAKAFK)
FGA	1.4	0.1	FGA G401W (TARGET-30-PARRLH)
FGB	1.4	0
FGF1	2.2	0
FGF10	4	0
FGF2	4	0.1	TARGET-30-PARDUJ ( FGF2 AMPLIFIED)
FGFBP3	2.9	0
FGFR2	2.9	0
FGFR4	5	0.1	FGFR4 AMPLIFIED (TARGET-30-PARFBW)	FGFR4 HOMODELETED (TARGET-30-PARRBU)
FGG	1.4	0
FGL1	1.4	0
FGL2	6	0
FH	5	0
FIBCD1	5	0.1	FIBCD1 AMPLIFIED (TARGET-30-PARFBW)
FKBP10	2.9	0.2	FKBP10 AMPLIFIED (TARGET-30-PARGUX)	FKBP10 AMPLIFIED (TARGET-30-PALJVX)	FKBP10 S8Qfs*67 (TARGET-30-PALBFW)
FLG	4	0.5	FLG G466E (TARGET-30-PANLET)	FLG Q2198R (TARGET-30-PATEPF)	FLG P3902L (N744)	FLG Q2474H (ARGET-30-PAKZRF)	FLG Q3244H (TARGET-30-PALNLU)	FLG E1300D (TARGET-30-PAMYCE)	FLG S2129E (TARGET-30-PARKAG)	FLG Q2115K (TARGET-30-PASXNN)	FLG Q2198R (TARGET-30-PATEPF)
FLOT1	4	0
FLRT1	7	0.1	FLRT1 AMPLIFIED (TARGET-30-PADSEC)	FLRT1 AMPLIFIED (TARGET-30-PAKAFK)
FLRT2	4	0.1	FLRT2 HOMODELETED (TARGET-30-PARSEA)
FLRT3	5	0
FMOD	2.9	0
FN1	4	0.1	FN1 HOMODELETED (TARGET-30-PASAZJ)	FN1 Q301K (N742)
FOXC1	7	0
FOXC2	4	0.1	FOXC2 HOMODELETED (TARGET-30-PASCUF)
FOXF1	0.7	0.1	FOXF1 HOMODELETED (TARGET-30-PASCUF)	FOXF1 C377* (N492)
FOXF2	2.9	0
FOXO3	6	0
FRAS1	4	0.3	FRAS1 D3466E (TARGET-30-PALIIN)	FRAS1 D2996N (TARGET-30-PANBCI)	FRAS1 V2023F (TARGET-30-PANLET)	FRAS1 M490I (TARGET-30-PATEPF)
FREM1	6	0
FREM2	4	0.3	FREM2 N1450K (TARGET-30-PANPVI)	FREM2 L1385F (TARGET-30-PAPPKJ)	FREM2 V1630I (TARGET-30-PARVNT)	FREM2 D1318Y (TARGET-30-PASCLP)	FREM2 S1416N (TARGET-30-PASWIJ)
FREM3	4	0.1	FREM3 AMPLIFIED (TARGET-30-PARDUJ)
FSCN1	4	0.1	FSCN1 HOMODELETED (TARGET-30-PARUXY)
FURIN	6	0
FZD4	6	0.1	FZD4 HOMODELETED (TARGET-30-PADIEY)	FZD4 HOMODELETED (TARGET-30-PADLPR)
GARS1	5	0.1	GARS1 E730D (TARGET-30-PAIMDT)
GAS2	4	0
GAS6	5	0
GDF10	0	0
GDF15	2.9	0
GFOD2	6	0
GFUS	4	0.1	GFUS AMPLIFIED (TARGET-30-PARUXY)
GH1	4	0.1	GH1 AMPLIFIED (TARGET-30-PADSEC)	GH1 AMPLIFIED (TARGET-30-PARGUX)
GLG1	5	0.1	GLG1 A104G (NBL41)
GLRX2	5	0
GLUD1	4	0
GNPAT	4	0
GOT2	5	0
GP1BA	6	0
GP2	6	0
GPC1	2.9	0.1	GPC1 HOMODELETED (TARGET-30-PASAZJ)
GPC2	4	0.2	GPC2 G536W (TARGET-30-PANXJL)	GPC2 R211C (TARGET-30-PAPBZI)	GPC2 Q341K (TARGET-30-PATGWT)
GPC3	6	0.1	GPC3 HOMODELETED (TARGET-30-PASJYB)
GPC4	4	0.1	GPC4 HOMODELETED (TARGET-30-PAISSH)	GPC4 HOMODELETED (TARGET-30-PASJYB)
GPC5	5	0
GPC6	6	0
GPLD1	4	0
GPM6B	6	0.1	GPM6B H263N (TARGET-30-PAMBAC)
GREM1	4	0
GRHPR	6	0
GSR	6	0
GSTK1	4	0
GSTP1	2.9	0.2	GSTP1 AMPLIFIED (TARGET-30-PADSEC)	GSTP1 AMPLIFIED (TARGET-30-PAKAFK)	GSTP1 AMPLIFIED (TARGET-30-PARGUX)
HADH	6	0
HAPLN1	1.4	0
HAPLN2	6	0
HAPLN3	6	0
HAPLN4	5	0
HAS1	2.2	0
HAS2	4	0
HAS3	6	0
HAT1	4	0
HDGF	5	0
HLCS	6	0
HMCN1	2.2	0.5	HMCN1 A1903E (TARGET-30-PARGKK)	HMCN1 Y1331C (TARGET-30-PALWVJ)	HMCN1 S2054N (NBL43)	HMCN1 E5424Q (N599)	HMCN1 S2578R (TARGET-30-PAKJRE)	HMCN1 I2624V (ARGET-30-PALZZV)	HMCN1 Q1586K (TARGET-30-PAPTMM)	HMCN1 A962S (TARGET-30-PASSRS)
HMCN2	1.4	0
HMGCL	4	0.1	HMGCL HOMODELETED (TARGET-30-PARRBU)	HMGCL HOMODELETED (TARGET-30-PACUGP)
HNRNPA2B1	4	0.1	HNRNPA2B1 HOMODELETED (TARGET-30-PARUXY)
HNRNPM	4	0
HPN	2.2	0
HPSE	4	0.1	HPSE N439I (TARGET-30-PASYLD)
HPSE2	1.4	0
HPX	1.4	0
HRG	1.4	0
HRNR	2.2	0.2	HRNR G211V (TARGET-30-PARGKK)	HRNR Q285H (N041)	HRNR E971K (TARGET-30-PAPPKJ)
HSD17B12	4	0
HSP90B1	6	0
HSPA1L	0	0
HSPA9	5	0
HSPD1	6	0.1	HSPD1 HOMODELETED (TARGET-30-PASAZJ)
HSPE1	5	0.1	HSPE1 HOMODELETED (TARGET-30-PASAZJ)
HSPG2	7	0.4	HSPG2 HOMODELETED (TARGET-30-PARRBU)	HSPG2 R485W (TARGET-30-PALWVJ)	HSPG2 R2992C (NBL06)	HSPG2 D230N (TARGET-30-PARDYU)	HSPG2 E1680K (TARGET-30-PASWVY)	HSPG2 A205V (TARGET-30-PASXIE)
HTRA1	4	0
IBSP	1.4	0
ICAM1	4	0.1	ICAM1 L254Q (TARGET-30-PALAKM)
ICAM2	6	0.1	ICAM2 AMPLIFIED (TARGET-30-PADSEC)	ICAM2 AMPLIFIED (TARGET-30-PARGUX)
ICAM3	6	0
ICAM4	0.7	0
ICAM5	5	0
IDE	2.9	0.1	IDE A12T (TARGET-30-PARFWB)
IDH1	4	0.2	IDH1 HOMODELETED (TARGET-30-PASAZJ)	IDH1 D232A (N041)	IDH1 G289C (TARGET-30-PASYMX)
IDH2	4	0.1	IDH2 S227C (NBL23)
IFNA2	0	0
IGFALS	1.4	0.1	IGFALS Q418P (TARGET-30-PASTKC)
IGFBP7	6	0
IHH	6	0.1	IHH HOMODELETED (TARGET-30-PASAZJ)	IHH A345V (TARGET-30-PAPPKJ)
IL6	2.2	0.1	IL6 HOMODELETED (TARGET-30-PARUXY)
IL7	4	0
IMPG1	6	0
IMPG2	6	0
INHBE	1.4	0
IQGAP1	6	0.1	IQGAP1 E432D (TARGET-30-PANBCI)	IQGAP1 R755H (TARGET-30-PASXHE)
ITGA1	5	0
ITGA10	2.9	0.1	ITGA10 A508S (TARGET-30-PASMNT)	ITGA10 A600S (TARGET-30-PASVRU)
ITGA11	2.2	0.1	ITGA11 X931_splice (TARGET-30-PASXIE)
ITGA2	5	0.1	ITGA2 E233* (TARGET-30-PAKFUY)	ITGA2 L1179F (TARGET-30-PARFWB)
ITGA2B	7	0.2	ITGA2B AMPLIFIED (TARGET-30-PALJVX)	ITGA2B AMPLIFIED (TARGET-30-PARGUX)	ITGA2B AMPLIFIED (TARGET-30-PARFBW)
ITGA3	6	0.2	ITGA3 AMPLIFIED (TARGET-30-PALJVX)	ITGA3 AMPLIFIED (TARGET-30-PARGUX)	ITGA3 A328V (TARGET-30-PALIIN)
ITGA4	4	0.1	ITGA4 HOMODELETED (TARGET-30-PASAZJ)
ITGA5	6	0.1	ITGA5 V493M (TARGET-30-PAPPKJ)
ITGA6	5	0.1	ITGA6 E1101Kfs*? (TARGET-30-PARNLJ)	ITGA6 K772N (TARGET-30-PAIFXV)
ITGA7	6	0.1	ITGA7 E436K (TARGET-30-PAIVHE)
ITGA8	4	0.1	ITGA8 S221R (TARGET-30-PAKJRE)
ITGA9	4	0
ITGAD	4	0
ITGAE	6	0.1	ITGAE X462_splice (NBL09)	ITGAE G758R (NBL48)
ITGAL	7	0
ITGAM	6	0.1	ITGAM X10_splice (TARGET-30-PASXHE)
ITGAV	6	0.1	ITGAV HOMODELETED (TARGET-30-PASAZJ)
ITGAX	4	0.1	ITGAX L239F (TARGET-30-PARYNK)
ITGB1	4	0.1	ITGB1 S355P (NBL27)	ITGB1 S526G (N683)
ITGB2	4	0.1	ITGB2 AMPLIFIED (TARGET-30-PARUXY)
ITGB3	6	0.1	ITGB3 AMPLIFIED (TARGET-30-PALJVX)	ITGB3 AMPLIFIED (TARGET-30-PARGUX)
ITGB4	6	0.5	ITGB4 AMPLIFIED (TARGET-30-PARUXY)	ITGB4 AMPLIFIED (TARGET-30-PACRYY)	ITGB4 AMPLIFIED (TARGET-30-PADSEC)	ITGB4 AMPLIFIED (TARGET-30-PARFBW)	ITGB4 AMPLIFIED (TARGET-30-PARIKT)	ITGB4 A231V (TARGET-30-PALFPI)	ITGB4 R98C (TARGET-30-PAPPKJ)
ITGB5	2.2	0
ITGB6	2.9	0.1	ITGB6 AMPLIFIED (TARGET-30-PASDZJ)
ITGB7	6	0
ITGB8	4	0.1	ITGB8 HOMODELETED (TARGET-30-PARUXY)
ITGBL1	2.9	0
ITIH1	1.4	0
ITIH2	2.2	0.1	ITIH2 HOMODELETED (TARGET-30-PASAZJ)
ITIH4	1.4	0.1	ITIH4 N573K (N572)
ITIH5	5	0.1	ITIH5 HOMODELETED (TARGET-30-PASAZJ)	TIH5 G563* (TARGET-30-PALIIN)
JAG1	5	0.1	JAG1 A1168V (NBL08)
JAM2	7	0.1	JAM2 HOMODELETED (TARGET-30-PARACM)
JAM3	4	0
JUP	5	0.1	JUP AMPLIFIED (TARGET-30-PALJVX)	JUP AMPLIFIED (TARGET-30-PARGUX)
KARS1	5	0
KAZALD1	4	0.1	KAZALD1 T28Dfs*80 (TARGET-30-PAPBJT)
KDR	2.2	0.2	KDR X756_splice (TARGET-30-PAUUHD)	KDR E465G (NBL42)	KDR L252I (TARGET-30-PASNZU)
KERA	2.2	0.1	KERA AMPLIFIED (TARGET-30-PARJTB)
KIF9	4	0
KLK2	5	0
KLK4	4	0.1	KLK4 Y216* (N406)
KLK5	2.2	0.1	KLK5 Y145* (TARGET-30-PAPTJB)
KLK7	1.4	0
KLKB1	2.2	0.1	KLKB1 HOMODELETED (TARGET-30-PARXLM)
KNG1	1.4	0
KRT1	0.7	0.1	KRT1 G50C (TARGET-30-PAMCXF)	KRT1 E378K (TARGET-30-PASXRG)
KRT8	4	0
L1CAM	1.4	0.1	L1CAM N433I (TARGET-30-PASMNT)
LACRT	0	0
LAD1	4	0
LAMA1	6	0.1	LAMA1 L215F (TARGET-30-PASWLY)
LAMA2	0	0
LAMA3	6	0.1	LAMA3 V2399L (TARGET-30-PAKJRE)	LAMA3 P724Q (TARGET-30-PARGUX)
LAMA4	5	0
LAMA5	5	0
LAMB1	6	0.1	LAMB1 R738G (TARGET-30-PATEPF)
LAMB2	5	0.2	LAMB2 X1409_splice (TARGET-30-PAPSKM)	LAMB2 R551H (TARGET-30-PARZKK)	LAMB2 A1446V (TARGET-30-PASWVY)
LAMB3	2.9	0.1	LAMB3 L1036M (NBL56)
LAMB4	6	0
LAMC1	5	0
LAMC2	5	0.1	LAMC2 L681F (NBL54)	LAMC2 C470F (TARGET-30-PATBMM)
LAMC3	5	0.1	LAMC3 AMPLIFIED (TARGET-30-PARFBW)	LAMC3 G822V (TARGET-30-PALXHW)
LAMP2	6	0.1	LAMP2 HOMODELETED (TARGET-30-PASJYB)
LCP1	5	0.1	LCP1 A532S (NBL26)
LEFTY2	6	0
LGALS1	6	0
LGALS3	6	0
LGALS3BP	4	0.4	LGALS3BP AMPLIFIED (TARGET-30-PARFBW)	LGALS3BP AMPLIFIED (TARGET-30-PACRYY)	LGALS3BP AMPLIFIED (TARGET-30-PADSEC)	LGALS3BP AMPLIFIED (TARGET-30-PAKAFK)	LGALS3BP AMPLIFIED (TARGET-30-PARIKT)	LGALS3BP AMPLIFIED (TARGET-30-PARUXY)
LGALS4	4	0
LGALS9	4	0
LINGO1	4	0
LINGO2	4	0.1	LINGO2 R599K (N106)	LINGO2 R31H (TARGET-30-PASWLY)
LINGO3	2.9	0
LINGO4	2.9	0
LMAN1	5	0
LMAN1L	1.4	0
LOX	2.9	0
LOXL1	1.4	0
LOXL2	2.9	0.1	LOXL2 H496Y (NBL51)
LOXL3	2.9	0
LOXL4	6	0
LRIG1	5	0
LRIG2	2.9	0
LRIG3	1.4	0.1	LRIG3 C817F (TARGET-30-PAPUWY)
LRP1	4	0.1	LRP1 C2703W (TARGET-30-PAIXIF)
LRP5	6	0.3	LRP5 AMPLIFIED (TARGET-30-PADSEC)	LRP5 AMPLIFIED (TARGET-30-PAKAFK)	LRP5 AMPLIFIED (TARGET-30-PARGUX)	LRP5 Q1025L (N194)
LRRC15	2.2	0.1	LRRC15 A558V (TARGET-30-PAPEFE)
LRRC17	4	0
LRRC24	4	0.1	LRRC24 AMPLIFIED (TARGET-30-PARUXY)
LRRC32	2.9	0
LRRC3B	6	0
LRRC3C	2.9	0.1	LRRC3C AMPLIFIED (TARGET-30-PARGUX)	LRRC3C AMPLIFIED (TARGET-30-PALJVX)
LRRK2	4	0
LRRN1	2.9	0.1	LRRN1 HOMODELETED (TARGET-30-PACRYY)	LRRN1 HOMODELETED (TARGET-30-PADIEY)
LRRN2	5	0
LRRN3	4	0
LRRTM1	2.9	0
LRRTM3	5	0
LRRTM4	6	0.2	LRRTM4 E113Rfs*15 (TARGET-30-PATEPF)	LRRTM4 R136C (NBL19)	LRRTM4 G62A (N717)
LTBP1	4	0.3	LTBP1 AMPLIFIED (TARGET-30-PARFBW)	LTBP1 Q520E (NBL01)	LTBP1 D1185Y (TARGET-30-PAPKXS)	LTBP1 A267V (TARGET-30-PATDXC)
LTBP2	6	0.1	LTBP2 HOMODELETED (TARGET-30-PARSEA)
LTBP3	4	0.2	LTBP3 AMPLIFIED (TARGET-30-PARGUX)	LTBP3 AMPLIFIED (TARGET-30-PADSEC)	LTBP3 AMPLIFIED (TARGET-30-PAKAFK)
LTBP4	6	0.1	LTBP4 F450L (TARGET-30-PARGHY)
LUM	6	0.1	LUM AMPLIFIED (TARGET-30-PARJTB)	LUM P39A (TARGET-30-PARASL)
LYPD3	5	0
LYPD5	6	0
LYVE1	2.9	0
MADCAM1	6	0
MARCOL	0	0
MATN1	6	0.2	MATN1 AMPLIFIED (TARGET-30-PARUXY)	MATN1 HOMODELETED (TARGET-30-PARRBU)	MATN1 S65F (TARGET-30-PAITEG)
MATN2	7	0
MATN3	5	0.1	MATN3 AMPLIFIED (TARGET-30-PARFBW)
MATN4	2.2	0
MBL2	1.4	0.1	MBL2 G135W (NBL40)
MDH2	6	0.1	MDH2 E153* (TARGET-30-PAIMDT)
MDK	4	0
MEGF9	4	0
MELTF	2.2	0
MEPE	1.4	0
MFAP1	4	0.1	MFAP1 HOMODELETED (TARGET-30-PASJYB)
MFAP2	1.4	0.2	MFAP2 HOMODELETED (TARGET-30-PACUGP)	MFAP2 HOMODELETED (TARGET-30-PARRBU)	MFAP2 HOMODELETED (TARGET-30-PARXLM)
MFAP4	2.2	0.1	MFAP4 X53_splice (TARGET-30-PALAKM)
MFAP5	4	0.1	MFAP5 AMPLIFIED (TARGET-30-PASAZJ)
MFGE8	6	0
MGP	4	0.1	MGP AMPLIFIED (TARGET-30-PASAZJ)
MIA	0	0
MINK1	5	0
MMP1	2.9	0.3	MMP1 HOMODELETED (TARGET-30-PADIEY)	MMP1 HOMODELETED (TARGET-30-PADLPR)	MMP1 HOMODELETED (TARGET-30-PARIKT)	MMP1 T373S (TARGET-30-PARKZF)
MMP10	5	0.2	MMP10 HOMODELETED (TARGET-30-PADIEY)	MMP10 HOMODELETED (TARGET-30-PADLPR)	MMP10 HOMODELETED (TARGET-30-PARIKT)
MMP11	4	0.1	MMP11 AMPLIFIED (TARGET-30-PASCLP)
MMP12	0	0.3	MMP12 HOMODELETED (TARGET-30-PADIEY)	MMP12 HOMODELETED (TARGET-30-PADLPR)	MMP12 HOMODELETED (TARGET-30-PARIKT)	MMP12 *176* (N462)
MMP13	2.2	0.2	MMP13 HOMODELETED (TARGET-30-PADIEY)	MMP13 HOMODELETED (TARGET-30-PADLPR)	MMP13 HOMODELETED (TARGET-30-PARIKT)
MMP14	2.2	0
MMP15	4	0
MMP16	4	0
MMP17	4	0.1	MMP17 AMPLIFIED (TARGET-30-PADUYJ)	MMP17 AMPLIFIED (TARGET-30-PALETP)
MMP19	4	0
MMP2	1.4	0.1	MMP2 D229G (TARGET-30-PARMLF)
MMP20	2.2	0.2	MMP20 HOMODELETED (TARGET-30-PADIEY)	MMP20 HOMODELETED (TARGET-30-PADLPR)	MMP20 HOMODELETED (TARGET-30-PARIKT)
MMP21	2.9	0
MMP23B	1.4	0.2	MMP23B HOMODELETED (TARGET-30-PARRBU)	MMP23B HOMODELETED (TARGET-30-PARXLM)	MMP23B HOMODELETED (TARGET-30-PASDZJ)
MMP24	2.2	0
MMP25	5	0
MMP26	2.2	0
MMP27	2.9	0.3	MMP27 HOMODELETED (TARGET-30-PADIEY)	MMP27 HOMODELETED (TARGET-30-PADLPR)	MMP27 HOMODELETED (TARGET-30-PARIKT)	MMP27 A17E (TARGET-30-PAKJRE)
MMP28	0	0.1	MMP28 AMPLIFIED (TARGET-30-PADSEC)	MMP28 AMPLIFIED (TARGET-30-PALJVX)
MMP3	2.9	0.2	MMP3 HOMODELETED (TARGET-30-PADIEY)	MMP3 HOMODELETED (TARGET-30-PADLPR)	MMP3 HOMODELETED (TARGET-30-PARIKT)
MMP7	1.4	0.2	MMP7 HOMODELETED (TARGET-30-PADIEY)	MMP7 HOMODELETED (TARGET-30-PADLPR)	MMP7 HOMODELETED (TARGET-30-PARIKT)
MMP8	4	0.3	MMP8 HOMODELETED (TARGET-30-PADIEY)	MMP8 HOMODELETED (TARGET-30-PADLPR)	MMP8 HOMODELETED (TARGET-30-PARIKT)	MMP8 P276H (N744)
MMP9	5	0
MMRN1	6	0.1	MMRN1 K669N (NBL23)	MMRN1 R59W (TARGET-30-PALRSD)
MMRN2	4	0
MPST	4	0
MPV17	4	0.1	MPV17 AMP (TARGET-30-PARFBW)
MPZL3	4	0.3	MPZL3 V130L (N717)	MPZL3 T57N (TARGET-30-PAIPGU)	MPZL3 A7V (TARGET-30-PASEWX)	MPZL3 L14P (TARGET-30-PASUYG)
MRPL18	2.9	0
MSLN	4	0.1	MSLN AMPLIFIED (TARGET-30-PARUXY)
MST1	1.4	0.1	MST1 X417_splice (TARGET-30-PATFCY)
MTHFD2	6	0
MUC17	2.2	0.5	MUC17 A251T (NBL47)	MUC17 G4393D (NBL48)	MUC17 T1748A (TARGET-30-PAKFUY)	MUC17 T1818K (TARGET-30-PALHVD)	MUC17 A64V (TARGET-30-PARDIW)	MUC17 T2018I (TARGET-30-PASTKC)	MUC17 A2963S (TARGET-30-PATINJ)
MUC2	0	0.1	MUC2 AMPLIFIED (TARGET-30-PAAPFA)	MUC2 AMPLIFIED (TARGET-30-PACRYY)
MUC3A	5	0
MUC4	5	0.3	MUC4 P2210H (TARGET-30-PALCBW)	MUC4 M4492R (NBL29)	MUC4 A2169V (TARGET-30-PAIXNV)	MUC4 L4230P (TARGET-30-PAMZGT)	MUC4 A5255V (TARGET-30-PARMLF)
MUC5AC	4	0
MUC5B	4	0.5	MUC5B AMPLIFIED (TARGET-30-PAAPFA)	MUC5B AMPLIFIED (TARGET-30-PACRYY)	MUC5B I2221T (TARGET-30-PALCBW)	MUC5B Q4177K (NBL36)	MUC5B H2657P (TARGET-30-PAPREJ)	MUC5B K1532N (TARGET-30-PAPTJB)	MUC5B P2052L, MUC5B T2053S, MUC5B T2042I, MUC5B R3885S (TARGET-30-PARFWB)
MUC6	6	0.1	MUC6 AMPLIFIED (TARGET-30-PAAPFA)	MUC6 AMPLIFIED (TARGET-30-PACRYY)
MXRA5	1.4	0.1	MXRA5 P820L (TARGET-30-PAIFXV)
MXRA7	7	0.4	MXRA7 AMPLIFIED (TARGET-30-PACRYY)	MXRA7 AMPLIFIED (TARGET-30-PADSEC)	MXRA7 AMPLIFIED (TARGET-30-PAKAFK)	MXRA7 AMPLIFIED (TARGET-30-PARFBW)	MXRA7 AMPLIFIED (TARGET-30-PARIKT)	MXRA7 AMPLIFIED (TARGET-30-PARUXY)
MXRA8	6	0.2	MXRA8 HOMODELETED (TARGET-30-PARRBU)	MXRA8 HOMODELETED (TARGET-30-PARXLM)	MXRA8 HOMODELETED (TARGET-30-PASDZJ)
MYF5	1.4	0.1	MYF5 V121A (TARGET-30-PARACR)
MYH11	5	0.2	MYH11 X694_splice (TARGET-30-PASAZZ)	MYH11 E1076K (NBL58)	MYH11 K1820M (TARGET-30-PATHVK)
MYO1E	6	0
MYOC	1.4	0
NAXE	6	0
NBL1	4	0.1	NBL1 HOMODELETED (TARGET-30-PACUGP)	NBL1 HOMODELETED (TARGET-30-PARRBU)
NCAM1	5	0.1	NCAM1 X269_splice (TARGET-30-PASGUT)	NCAM1 G353S (TARGET-30-PASLRM)
NCAN	4	0.2	NCAN W541L (TARGET-30-PANIPC)	NCAN P1218L (TARGET-30-PANLET)	NCAN A654T (TARGET-30-PAPKXS)
NDNF	1.4	0.1	NDNF AMPLIFIED (TARGET-30-PARDUJ)
NDP	6	0
NDUFAF7	4	0
NF1	2.2	0.5	NF1 AMPLIFIED (TARGET-30-PARSEA)	NF1 R304G (TARGET-30-PATNRK)	NF1 E2231*Likely Oncogenic, NF1 E2501*Likely Oncogenic (TARGET-30-PALJPX)	NF1 R2450*Likely Oncogenic (TARGET-30-PAPREJ)	NF1 Q347*Likely Oncogenic (TARGET-30-PATVTL)	NF1 K660*Likely Oncogenic (TARGET-30-PATWMX)	NF1 X2397_spliceLikely Oncogenic (TARGET-30-PATHYK)
NFKB2	6	0.1	NFKB2 Q896Sfs*41 (TARGET-30-PAPPKJ)
NID1	6	0.1	NID1 HOMODELETED (TARGET-30-PASJYB)	NID1 N79S (NBL49)
NID2	6	0
NLGN1	4	0.1	NLGN1 L584I (TARGET-30-PASJYB)	NLGN1 K286E (TARGET-30-PAPTLA)
NOS2	6	0.1	NOS2 H230N (NBL38)	NOS2 A440E (N508)
NOTCH1	4	0.2	NOTCH1 C2189Y (TARGET-30-PAPPKJ)	NOTCH1 F1259S (TARGET-30-PARDCK)	NOTCH1 AMPLIFIED (TARGET-30-PARFBW)
NOX1	2.9	0.1	NOX1 HOMODELETED (TARGET-30-PASJYB)	NOX1 A424S (TARGET-30-PARKAG)
NOXO1	6	0
NPHS1	4	0
NPNT	6	0
NPPA	4	0.2	NPPA HOMODELETED (TARGET-30-PACUGP)	NPPA HOMODELETED (TARGET-30-PARRBU)	NPPA HOMODELETED (TARGET-30-PARXLM)
NR2E1	0.7	0
NRP1	4	0
NRROS	5	0
NTN1	6	0
NTN3	5	0
NTN4	4	0.1	NTN4 AMPLIFIED (TARGET-30-PARJTB)
NTN5	5	0
NTNG1	5	0.1	NTNG1 HOMODELETED (TARGET-30-PARJTB)	NTNG1 R170Q (TARGET-30-PAIFXV)
NTNG2	5	0.1	NTNG2 AMPLIFIED (TARGET-30-PARFBW)
NUDT1	6	0
NUDT9	2.9	0
NUMA1	4	0.1	NUMA1 HOMODELETED (TARGET-30-PAKADI)
NYX	0.7	0
OC90	6	0
OGG1	4	0.1	OGG1 HOMODELETED (TARGET-30-PACRYY)
OGN	6	0
OIT3	2.2	0.1	OIT3 HOMODELETED (TARGET-30-PAKADI)	OIT3 L6I (N481)
OLFML2A	7	0.1	OLFML2A G228* (NBL08)
OMD	4	0
OPTC	2.9	0
ORM1	1.4	0
ORM2	1.4	0
OTC	2.2	0
OTOA	4	0.1	OTOA Q306* (TARGET-30-PAPVXS)
OTOG	4	0
OTOGL	2.9	0
OTOL1	0.7	0
OXCT1	2.9	0
P3H1	2.9	0
P3H2	2.9	0
P3H4	2.9	0
P4HA1	5	0.1	P4HA1 HOMODELETED (TARGET-30-PAKADI)
PAPLN	6	0.1	PAPLN HOMODELETED (TARGET-30-PARSEA)	PAPLN C639F (TARGET-30-PAMDAL)
PARK7	2.2	0.3	PARK7 HOMODELETED (TARGET-30-PARRBU)	PARK7 HOMODELETED (TARGET-30-PARXLM)	PARK7 HOMODELETED (TARGET-30-PASDZJ)	PARK7 HOMODELETED (TARGET-30-PASLGS)
PCK2	2.2	0
PCOLCE	6	0
PCSK6	4	0.1	PCSK6 HOMODELETED (TARGET-30-PARXZR)
PDGFA	9	0.1	PDGFA E176* (TARGET-30-PARGKK)
PDGFB	6	0
PDGFRA	6	0.1	PDGFRA Q227* (TARGET-30-PARACS)
PDK2	4	0.1	PDK2 AMPLIFIED (TARGET-30-PARGUX)	PDK2 AMPLIFIED (TARGET-30-PALJVX)
PDK4	4	0
PDPN	4	0.2	PDPN HOMODELETED (TARGET-30-PARRBU)	PDPN HOMODELETED (TARGET-30-PARXLM)	PDPN HOMODELETED (TARGET-30-PACUGP)
PECAM1	0	0.1	PECAM1 AMPLIFIED (TARGET-30-PARGUX)	PECAM1 AMPLIFIED (TARGET-30-PADSEC)
PEX1	4	0
PF4	2.2	0
PHLDB1	4	0.1	PHLDB1 S44I (TARGET-30-PARKAG)
PHLDB2	6	0
PHOSPHO1	1.4	0.1	PHOSPHO1 AMPLIFIED (TARGET-30-PALJVX)	PHOSPHO1 AMPLIFIED (TARGET-30-PARGUX)
PI3	2.2	0
PKD1	1.4	0.1	PKD1 A696V (TARGET-30-PAPLSD)	PKD1 H2607L (TARGET-30-PASWAU)
PKHD1	5	0.2	PKHD1 G772V (N165)	PKHD1 F586L (TARGET-30-PAPTJB)	PKHD1 P371T (TARGET-30-PAPTLD)
PKM	6	0.1	PKM A242V (TARGET-30-PATDXG)
PLAU	2.9	0.1	PLAU HOMODELETED (TARGET-30-PAKADI)	PLAU HOMODELETED (TARGET-30-PADPHP)
PLEKHA2	5	0
PLET1	2.9	0
PLG	1.4	0
PLOD3	4	0
PLSCR1	4	0.1	PLSCR1 D244E (TARGET-30-PARDIW)
PMPCA	1.4	0.1	PMPCA AMPLIFIED (TARGET-30-PARFBW)
PODN	6	0.1	PODN AMPLIFIED (TARGET-30-PADMGA)
PODNL1	2.2	0
POMT1	4	0.1	POMT1 AMPLIFIED (TARGET-30-PARFBW)
POMZP3	4	0.1	POMZP3 HOMODELETED (TARGET-30-PASDZJ)
POSTN	2.2	0
PPFIA2	4	0.1	PPFIA2 P1220Q (N718)	PPFIA2 G847W (TARGET-30-PALJPX)
PRDX4	5	0
PRDX5	6	0.1	PRDX5 AMPLIFIED (TARGET-30-PADSEC)	PRDX5 AMPLIFIED (TARGET-30-PAKAFK)
PRELP	2.2	0
PRG2	2.2	0.1	PRG2 K85R (TARGET-30-PARKGJ)
PRG3	5	0
PRG4	0.7	0
PRKCD	5	0
PRKCZ	4	0.2	PRKCZ HOMODELETED (TARGET-30-PARRBU)	PRKCZ HOMODELETED (TARGET-30-PARXLM)	PRKCZ HOMODELETED (TARGET-30-PASDZJ)
PRSS1	2.2	0
PRSS2	0	0
PRTN3	2.9	0
PSAP	0	0.1	PSAP HOMODELETED (TARGET-30-PAKADI)
PSMA6	5	0
PTEN	4	0
PTK2	5	0.1	PTK2 AMPLIFIED (TARGET-30-PARUXY)	PTK2 R28C (TARGET-30-PARASL)
PTK2B	6	0
PTN	4	0
PTPRA	4	0
PTPRJ	6	0
PTPRZ1	6	0.1	PTPRZ1 W1540* (TARGET-30-PARNNG)
PTX3	4	0
PXDN	4	0.1	PXDN AMPLIFIED (TARGET-30-PARFBW)	PXDN R933C (TARGET-30-PASSRS)
PZP	6	0.3	PZP AMPLIFIED (TARGET-30-PASAZJ)	PZP V1319I (TARGET-30-PAINLN)	PZP P765S (TARGET-30-PAPRMJ)	PZP A1221D (TARGET-30-PASZPI)
QSOX1	4	0.1	QSOX1 H352N (TARGET-30-PASSRS)	QSOX1 P636L (NBL37)
RAC1	2.9	0.1	RAC1 HOMODELETED (TARGET-30-PARUXY)
RAMP2	4	0.1	RAMP2 AMPLIFIED (TARGET-30-PALJVX)	RAMP2 AMPLIFIED (TARGET-30-PARGUX)
RARRES2	6	0.1	RARRES2 HOMODELETED (TARGET-30-PAPZYP)
RB1	4	0
RBP3	0	0
RECK	6	0
RELL2	4	0
RELN	6	0.3	RELN A3317R (TARGET-30-PAPKXS)	RELN H984N (TARGET-30-PASVRU)	RELN Q1032K (TARGET-30-PATLXP)	RELN Q921H (TARGET-30-PAULNF)
RGCC	6	0
RHOA	6	0
RIC1	4	0
RIC8A	4	0.2	RIC8A AMPLIFIED (TARGET-30-PADMGA)	RIC8A AMPLIFIED (TARGET-30-PAAPFA)	RIC8A AMPLIFIED (TARGET-30-PACRYY)
RIDA	1.4	0
ROCK1	6	0.1	ROCK1 K1149R (TARGET-30-PARSBI)
RPS3	2.2	0.1	RPS3 HOMODELETED (TARGET-30-PAKADI)
RPSA	9	0
RRAS	6	0
RTBDN	4	0
RTN4RL1	4	0
RTN4RL2	7	0.1	RTN4RL2 S40C (TARGET-30-PARASL)
RUVBL1	5	0
RUVBL2	6	0
S100A10	6	0
S100A4	5	0
S100A6	6	0
S100A7	4	0
S100A8	2.9	0
S100A9	4	0
SBSPON	6	0
SCARA3	2.2	0
SCUBE1	0.7	0.1	SCUBE1 E428G (N695)
SCUBE3	4	0.1	SCUBE3 R139Q (TARGET-30-PARHUX)
SCX	0	0
SDC2	4	0
SDC3	4	0.2	SDC3 AMPLIFIED (TARGET-30-PARUXY)	SDC3 HOMODELETED (TARGET-30-PARRBU)	SDC3 T253Pfs*46 (N127)
SDC4	4	0
SEMA3B	6	0.3	SEMA3B AMPLIFIED (TARGET-30-PADMGA)	SEMA3B AMPLIFIED (TARGET-30-PACUGP)	SEMA3B AMPLIFIED (TARGET-30-PADPHP)	SEMA3B AMPLIFIED (TARGET-30-PADUYJ)
SEMA3E	5	0
SEMA7A	6	0
SERAC1	4	0
SERPINA1	1.4	0
SERPINA3	4	0
SERPINA5	2.9	0.1	SERPINA5 L34F (TARGET-30-PARZIP)
SERPINB9	6	0
SERPINB1	5	0.1	SERPINB1 I77V (NBL25)
SERPINB12	0	0.1	SERPINB12 L213I (TARGET-30-PARVNT)
SERPINB5	0.7	0.1	SERPINB5 D95E (TARGET-30-PASGUT)
SERPINB6	7	0
SERPINB8	5	0.1	SERPINB8 T236M (TARGET-30-PASSRN)
SERPINC1	1.4	0
SERPINE2	6	0.1	SERPINE2 HOMODELETED (TARGET-30-PAKADI)	SERPINE2 HOMODELETED (TARGET-30-PASAZJ)
SERPINE1	4	0
SERPINF1	5	0.1	SERPINF1 Q133H (N170)
SERPINF2	1.4	0
SERPING1	9	0
SERPINH1	2.2	0.1	SERPINH1 HOMODELETED (TARGET-30-PAKADI)	SERPINH1 HOMODELETED (TARGET-30-PAAPFA)
SFRP1	5	0
SFRP2	1.4	0
SH3PXD2A	4	0
SH3PXD2B	2.9	0.1	SH3PXD2B HOMODELETED (TARGET-30-PARRBU)
SHH	6	0.1	SHH HOMODELETED (TARGET-30-PAPZYP)
SHMT2	4	0
SIGLEC1	6	0.3	SIGLEC1 E1227D (N571)	SIGLEC1 C1324F (TARGET-30-PANXJL)	SIGLEC1 D1196N (TARGET-30-PARDYU)	SIGLEC1 D53N (TARGET-30-PASUCB)	SIGLEC1 A1321T (TARGET-30-PATVDP)
SIRT3	5	0.3	SIRT3 G265W (TARGET-30-PAKHHB)	SIRT3 AMPLIFIED (TARGET-30-PAAPFA)	SIRT3 AMPLIFIED (TARGET-30-PACRYY)	SIRT3 AMPLIFIED (TARGET-30-PADMGA)
SIRT4	5	0.1	SIRT4 AMPLIFIED (TARGET-30-PADUYJ)
SIRT5	4	0
SKP2	4	0
SLC12A2	5	0
SLC25A5	6	0.1	SLC25A5 HOMODELETED (TARGET-30-PASJYB)
SLC2A10	4	0
SLC39A8	5	0
SLC9A1	6	0.2	SLC9A1 HOMODELETED (TARGET-30-PACUGP)	SLC9A1 HOMODELETED (TARGET-30-PARRBU)	SLC9A1 G760E (TARGET-30-PAISSH)
SLIT2	6	0.1	SLIT2 A340Cfs*20 (TARGET-30-PARYNK)	SLIT2 L1273M (NBL34)
SLK	2.2	0.1	SLK N422K (NBL53)
SLPI	4	0
SMAD3	4	0.1	SMAD3 A349S (N566)
SMOC1	4	0.1	SMOC1 HOMODELETED (TARGET-30-PARSEA)
SMOC2	4	0.1	SMOC2 A339Lfs*33 (N521)
SMPD3	2.9	0
SNCA	6	0
SNED1	4	0.1	SNED1 HOMODELETED (TARGET-30-PASAZJ)
SNORC	2.9	0.2	SNORC HOMODELETED (TARGET-30-PASAZJ)	SNORC HOMODELETED (TARGET-30-PARIKT)	SNORC HOMODELETED (TARGET-30-PAKADI)
SNW1	6	0.1	SNW1 HOMODELETED (TARGET-30-PARSEA)
SOD1	4	0
SOD2	2.2	0
SOD3	5	0
SOST	1.4	0.1	SOST AMPLIFIED (TARGET-30-PALJVX)	SOST AMPLIFIED (TARGET-30-PARGUX)
SOX9	2.2	0.3	SOX9 AMPLIFIED (TARGET-30-PARIKT)	SOX9 AMPLIFIED (TARGET-30-PACRYY)	SOX9 AMPLIFIED (TARGET-30-PADSEC)	SOX9 AMPLIFIED (TARGET-30-PARFBW)	SOX9 AMPLIFIED (TARGET-30-PARUXY)
SPACA3	2.9	0.1	SPACA3 AMPLIFIED (TARGET-30-PARSEA)
SPARC	0	0
SPARCL1	6	0
SPINK5	6	0.1	SPINK5 X1093_splice (TARGET-30-PARFWB)
SPINT1	4	0
SPINT2	5	0
SPN	4	0
SPOCK2	7	0.1	SPOCK2 HOMODELETED (TARGET-30-PAKADI)	SPOCK2 R283H (TARGET-30-PARHUX)
SPON1	0	0
SPON2	2.2	0.1	SPON2 I205N (NBL49)
SPP1	4	0
SPP2	1.4	0.1	SPP2 HOMODELETED (TARGET-30-PAKADI)	SPP2 HOMODELETED (TARGET-30-PASAZJ)
SPTBN4	4	0.1	SPTBN4 T1230A (TARGET-30-PANZVU)
SRC	4	0
SRF	4	0
SRPX	5	0.1	SRPX S37* (N744)
SRPX2	6	0.1	SRPX2 HOMODELETED (TARGET-30-PASJYB)
SSBP1	7	0
SSC5D	1.4	0
SSPOP	7	0.1	SSPOP HOMODELETED (TARGET-30-PAPZYP)
ST7	4	0.1	ST7 H485P (TARGET-30-PATEPF)
STATH	0	0
STRCP1	0	0
SUCLA2	6	0.1	SUCLA2 A372T (TARGET-30-PARMPP)
SULF1	4	0
SULF2	4	0
TCF15	6	0.1	TCF15 R199K (N744)
TECTA	4	0
TECTB	2.2	0
TEK	4	0
TENM1	6	0.1	TENM1 P2478S (NBL35)	TENM1 L46M (TARGET-30-PALETP)
TFIP11	6	0
TFPI2	5	0
TGFB1	8	0.1	TGFB1 A262D (TARGET-30-PASXNN)
TGFB1I1	6	0
TGFB2	5	0
TGFB3	4	0.1	TGFB3 HOMODELETED (TARGET-30-PARSEA)
TGFBI	2.9	0.1	TGFBI A19Rfs*40 (NBL21)
TGFBR1	2.2	0.1	TGFBR1 D400H, TGFBR1 F393L (TARGET-30-PASEGA)
TGFBR3	7	0.1	TGFBR3 HOMODELETED (TARGET-30-PARJTB)
TGM2	6	0.1	TGM2 F622L (TARGET-30-PANIPC)
TGM4	4	0.1	TGM4 H86N (TARGET-30-PAKZRE)
THBS1	6	0
THBS2	2.2	0.1	THBS2 C680Y (TARGET-30-PALBFW)
THBS3	5	0
THBS4	6	0
THSD1	4	0
THSD4	6	0
THY1	4	0.1	THY1 S44Afs*11 (TARGET-30-PARGUX)
TIAM1	6	0.3	TIAM1 W1285* (N607)	TIAM1 A1438S (N041)	TIAM1 I1393V (NBL40)	TIAM1 L562I (N159)
TIMP1	2.9	0
TIMP2	6	0.4	TIMP2 AMPLIFIED (TARGET-30-PARUXY)	TIMP2 AMPLIFIED (TARGET-30-PACRYY)	TIMP2 AMPLIFIED (TARGET-30-PADSEC)	TIMP2 AMPLIFIED (TARGET-30-PAKAFK)	TIMP2 AMPLIFIED (TARGET-30-PARFBW)	TIMP2 AMPLIFIED (TARGET-30-PARIKT)
TIMP3	8	0
TIMP4	4	0
TINAG	1.4	0
TINAGL1	6	0.1	TINAGL1 AMPLIFIED (TARGET-30-PARUXY)	TINAGL1 HOMODELETED (TARGET-30-PARRBU)
TLL1	5	0.1	TLL1 HOMODELETED (TARGET-30-PARXLM)
TLL2	4	0.1	TLL2 S707R (NBL45)	TLL2 G97W (TARGET-30-PALWVJ)
TLR2	6	0
TLR3	6	0.1	TLR3 HOMODELETED (TARGET-30-PARXLM)
TLR4	5	0
TMEFF1	2.9	0
TMEFF2	5	0.1	TMEFF2 HOMODELETED |(TARGET-30-PASAZJ)
TMEM38B	6	0
TMPRSS6	1.4	0.1	TMPRSS6 P33A (TARGET-30-PALHVD)
TNC	6	0.5	TNC I839F (TARGET-30-PALRSD)	TNC A1410T (NBL37)	TNC R1741Q (TARGET-30-PAINLN)	TNC C146F (TARGET-30-PAMZGT)	TNC N1476S (TARGET-30-PARURB)	TNC V1402L (TARGET-30-PARZIP)	TNC C567F (TARGET-30-PATXDV)	TNC D224N (TARGET-30-PAVABN)
TNF	0	0
TNFRSF1A	5	0.1	TNFRSF1A AMPLIFIED (TARGET-30-PASAZJ)	TNFRSF1A T282Hfs*22 (TARGET-30-PALAKE)
TNFRSF1B	6	0.2	TNFRSF1B HOMODELETED (TARGET-30-PARRBU)	TNFRSF1B HOMODELETED (TARGET-30-PARXLM)	TNFRSF1B HOMODELETED (TARGET-30-PACUGP)
TNFRSF11B	4	0
TNN	0.7	0.1	TNN S340I (TARGET-30-PALJPX)	TNN W905C (TARGET-30-PAPPKJ)
TNR	5	0
TNXB	2.9	0.5	TNXB G66* (NBL06)	TNXB C235Pfs*25 (TARGET-30-PALPGG)	TNXB G2024A (TARGET-30-PANUIF)	TNXB G721R (NBL08)	TNXB P176L (TARGET-30-PARFWB)	TNXB P960S (TARGET-30-PANIPC)	TNXB Q9L (TARGET-30-PASPER)	TNXB Q27L (TARGET-30-PASYPX)
TOMM70	4	0.1	TOMM70 V23G (NBL09)
TP53	6	0.1	TP53 D281NHotspotLikely Oncogenic (TARGET-30-PAPUWY)
TPSAB1	2.9	0.1	TPSAB1 AMPLIFIED (TARGET-30-PARUXY)
TPSB2	2.9	0.1	TPSB2 AMPLIFIED (TARGET-30-PARUXY)
TRIL	6	0
TSC1	4	0.2	TSC1 AMPLIFIED (TARGET-30-PARFBW)	TSC1 T356I (TARGET-30-PALFPI)	TSC1 G1137S (TARGET-30-PANXJL)
TST	2.2	0
TTR	1.4	0
TUFM	4	0
TUFT1	2.9	0
TXN2	4	0
TYMS	2.2	0
UCMA	4	0
UMOD	0.7	0.1	UMOD S16P (TARGET-30-PASRFS)
UMODL1	0	0
UQCC2	4	0
USH2A	4	0.3	USH2A L2120I (TARGET-30-PAPUWY)	USH2A G3824C (TARGET-30-PAISSH)	USH2A G3785V (TARGET-30-PANZVU)	USH2A H4164Y (TARGET-30-PAPTJB)
UTRN	6	0.2	UTRN X2853_splice (TARGET-30-PALUDH)	UTRN S2811C (NBL43)	UTRN G3150C (N571)
VASN	2.9	0
VCAM1	6	0.1	VCAM1 HOMODELETED (TARGET-30-PARJTB)	VCAM1 T245N (NBL21)
VCAN	2.2	0.1	VCAN E2624D (TARGET-30-PANUIF)	VCAN Q2380K (TARGET-30-PAPBJE)
VCL	7	0.2	VCL X262_splice (NBL08)	VCL HOMODELETED (TARGET-30-PADPHP)	VCL HOMODELETED (TARGET-30-PAKADI)
VDAC1	5	0
VEGFA	7	0
VIM	8	0.1	VIM D148H (N508)
VIPAS39	4	0
VIT	4	0.2	VIT AMPLIFIED (TARGET-30-PARFBW)	VIT C501* (N041)	VIT E561Q (TARGET-30-PASTKC)
VTN	4	0
VWA1	6	0.3	VWA1 HOMODELETED (TARGET-30-PARRBU)	VWA1 HOMODELETED (TARGET-30-PARXLM)	VWA1 HOMODELETED (TARGET-30-PASDZJ)	VWA1 R54Q (TARGET-30-PARFWB)	VWA1 M155Hfs*4 (TARGET-30-PALAKM)
VWA2	4	0
VWC2	2.9	0
VWF	5	0.1	VWF AMPLIFIED (TARGET-30-PASAZJ)
WASHC1	4	0
WDR72	6	0.2	WDR72 HOMODELETED (TARGET-30-PASJYB)	WDR72 Q171* (TARGET-30-PATDXC)	WDR72 K1095N (TARGET-30-PASXHE)
WNT11	4	0
WNT2	4	0
WNT2B	4	0
WNT3	6	0.1	WNT3 AMPLIFIED (TARGET-30-PARGUX)	WNT3 AMPLIFIED (TARGET-30-PALJVX)
WNT3A	5	0
WNT4	6	0.1	WNT4 HOMODELETED (TARGET-30-PARRBU)
WNT5A	4	0
WNT5B	6	0.1	WNT5B AMPLIFIED (TARGET-30-PASAZJ)
WNT6	2.9	0.1	WNT6 HOMODELETED (TARGET-30-PASAZJ)
WNT7A	0.7	0
WNT8A	8	0
WT1	4	0.1	WT1 R495P (TARGET-30-PANYBL)
ZAN	1.4	0.1	ZAN V2573M (TARGET-30-PALRSD)	ZAN A1106E (TARGET-30-PARGKK)
ZG16	1.4	0
ZP1	5	0.1	ZP1 AMPLIFIED (TARGET-30-PADSEC)
ZP2	2.9	0
ZP3	7	0.1	ZP3 HOMODELETED (TARGET-30-PASDZJ)
ZPLD1	1.4	0

## Sheet: S2-Gene ontology
Gene Ontology term enrichment of the 964 ECM-related genes in NB using KEGG tools
Rank	Term name	P-value	Z-score	Combined score	Overlapping genes	Adjusted p-value
1	Extracellular matrix organization Homo sapiens R-HSA-1474244	3.3e-286	160	100000	PRSS1 SPARC SERPINE1 COL12A1 ICAM2 ICAM3 DMP1 ICAM4 ICAM5 F11R ICAM1 CAPNS1 CAPNS2 BSG KDR DAG1 PRSS2 ACTN1 CTRB2 COL23A1 CTRB1 HSPG2 BCAN COL8A2 COL8A1 COL13A1 SDC4 SDC2 SDC3 PDGFB PDGFA KLK2 KLK7 ADAMTS16 ADAMTS14 ADAMTS18 SERPINH1 A2M ELANE COL24A1 FN1 COL1A1 COL1A2 COL9A1 COL9A3 COL9A2 DDR1 COL18A1 ELN NCAN CTSV CTSS MMP20 MMP25 MMP24 CTSL CTSK TIMP2 COL10A1 CTSG TIMP1 TPSAB1 CTSD CTSB BGN MM…	3.3e-283
2	Degradation of the extracellular matrix Homo sapiens R-HSA-1474228	1.3e-98	110	24000	COL18A1 PRSS1 COL16A1 COL14A1 COL12A1 LAMC2 LAMC1 CTSV CTSS MMP20 ADAMTS4 ADAMTS5 MMP25 MMP24 CAPNS1 CAPNS2 CDH1 CTSL ADAMTS1 CTSK BSG CAPN2 TIMP2 CTSG CAPN1 TIMP1 TPSAB1 ADAMTS8 PRSS2 CTSD ADAMTS9 CTSB MMP7 COL25A1 MMP1 CTRB2 MMP2 COL23A1 CTRB1 MMP3 ADAM10 MMP8 HSPG2 MMP9 MMP10 DCN MMP12 BCAN MMP11 MMP14 MMP13 ADAM15 MMP16 MMP15 MMP17 ADAM9 MMP19 ADAM8 CD44 COL17A1 LAMA5 COL15A1 COL13A1 LAMA3 HT…	6.6e-96
3	Collagen formation Homo sapiens R-HSA-1474290	7.8e-93	210	44000	COL18A1 COL16A1 COL14A1 ITGB4 COL12A1 LOXL3 LOXL4 PLOD3 LAMC2 CTSV LOXL1 CTSS LOXL2 MMP20 ADAMTS2 ADAMTS3 CTSL COL10A1 COLGALT1 CTSB MMP7 COL27A1 DST COL25A1 MMP3 COL23A1 PCOLCE MMP9 MMP13 COL2A1 COL4A2 LOX COL4A1 COL4A4 COL6A2 COL4A3 COL6A1 COL8A2 COL4A6 COL4A5 COL8A1 COL6A3 COL21A1 ITGA6 COL6A6 COL6A5 COL17A1 COL15A1 CD151 COL13A1 COL11A1 LAMA3 COL11A2 COL19A1 ADAMTS14 SERPINH1 COL28A1 CRTAP CO…	2.6e-90
4	Integrin cell surface interactions Homo sapiens R-HSA-216083	7e-90	1300000	260000000	ITGB1 COL18A1 COL16A1 ITGAM ITGB5 ITGB3 ITGA2B ITGB2 TNC ICAM2 ICAM3 ICAM4 ITGAE ICAM5 F11R ITGAL ICAM1 COMP IBSP CDH1 BSG KDR DAG1 ITGAX ITGB8 MADCAM1 ITGAV ITGB7 ITGB6 FGB FGA ITGA4 ITGA3 ITGA2 ITGA1 FGG COL23A1 HSPG2 ITGAD COL4A2 COL4A1 COL4A4 COL4A3 ITGA8 PECAM1 ITGA7 ITGA6 ITGA5 CD47 CD44 ITGA9 COL13A1 THBS1 VTN SPP1 JAM2 JAM3 VCAM1 LUM FN1 ITGA10 ITGA11 COL9A1 COL9A3 COL9A2 AGRN FBN1	1.8e-87
5	Assembly of collagen fibrils and other multimeric structures Homo sapiens R-HSA-2022090	2.3e-69	1100	170000	COL18A1 ITGB4 LOXL3 LOXL4 LAMC2 CTSV LOXL1 CTSS LOXL2 MMP20 CTSL COL10A1 CTSB MMP7 COL27A1 DST MMP3 PCOLCE MMP9 MMP13 COL2A1 COL4A2 LOX COL4A1 COL4A4 COL6A2 COL4A3 COL6A1 COL8A2 COL4A6 COL4A5 COL8A1 COL6A3 ITGA6 COL6A6 COL6A5 COL15A1 CD151 COL11A1 LAMA3 COL11A2 LAMB3 COL24A1 COL1A1 COL3A1 COL1A2 BMP1 COL5A1 COL5A3 COL7A1 COL5A2 TLL2 TLL1	4.6e-67
6	Diseases of glycosylation Homo sapiens R-HSA-3781865	1.1e-66	60	9100	SPON2 SPON1 NCAN ADAMTSL1 ADAMTS4 ADAMTS5 ADAMTS2 ADAMTS3 ADAMTSL5 ADAMTS1 ADAMTSL4 ADAMTSL3 ADAMTSL2 DAG1 ADAMTS8 ADAMTS9 ADAMTS6 ADAMTS7 SBSPON OMD BGN KERA MUC3A HSPG2 MUC5AC DCN ADAMTS20 BCAN VCAN NOTCH1 SDC4 SDC2 SDC3 PRELP ADAMTS12 CFP THBS2 THBS1 THSD1 ADAMTS10 THSD4 ADAMTS16 ADAMTS15 ACAN ADAMTS14 ADAMTS13 MUC2 ADAMTS19 GPC1 ADAMTS18 ADAMTS17 GPC3 GPC2 GPC5 GPC4 GPC6 MUC4 MUC6 LUM MUC17 M…	1.8e-64
7	Collagen biosynthesis and modifying enzymes Homo sapiens R-HSA-1650814	1.7e-66	170	25000	COL18A1 COL16A1 COL14A1 COL12A1 PLOD3 ADAMTS2 ADAMTS3 COL10A1 COLGALT1 COL27A1 COL25A1 COL23A1 PCOLCE COL2A1 COL4A2 COL4A1 COL4A4 COL6A2 COL4A3 COL6A1 COL8A2 COL4A6 COL4A5 COL8A1 COL6A3 COL21A1 COL6A6 COL6A5 COL17A1 COL15A1 COL13A1 COL11A1 COL11A2 COL19A1 ADAMTS14 SERPINH1 COL28A1 CRTAP COL26A1 COL24A1 COL22A1 COL1A1 COL3A1 COL1A2 BMP1 P4HA1 COL5A1 COL5A3 COL7A1 COL5A2 COL9A1 COL20A1 TLL2 COL9A3 …	2.4e-64
8	ECM proteoglycans Homo sapiens R-HSA-3000178	2.2e-65	360	54000	ITGB1 SPARC ITGB5 NCAN ITGB3 SERPINE1 ITGA2B TNC DMP1 LAMC1 HAPLN1 COMP IBSP TNN DAG1 ITGAX TNR ITGAV ITGB6 ITGA2 BGN DCN ASPN BCAN VCAN ITGA8 MATN1 ITGA7 MATN4 MATN3 ITGA9 LAMA5 TNXB LAMA2 LAMA1 LAMA4 LAMA3 VTN ACAN NCAM1 TGFB2 TGFB1 LUM TGFB3 LAMB2 LAMB1 DSPP COL9A1 COL9A3 COL9A2 AGRN FMOD	2.8e-63
9	Collagen degradation Homo sapiens R-HSA-1442490	7e-47	380	40000	COL17A1 COL18A1 COL15A1 COL16A1 COL13A1 COL14A1 COL12A1 FURIN COL19A1 MMP20 CTSL CTSK PRSS2 CTSD ELANE CTSB COL26A1 MMP7 COL25A1 MMP1 MMP2 MMP3 COL23A1 ADAM10 MMP8 MMP9 MMP10 MMP12 MMP11 MMP14 MMP13 MMP15 COL9A1 MMP19 ADAM9 COL9A3 COL9A2	7.8e-45
10	Platelet degranulation Homo sapiens R-HSA-114608	1.1e-45	24	2500	LGALS3BP APP SERPINA3 ECM1 ORM1 SPARC SERPINA1 ITGB3 SERPINE1 ITGA2B F13A1 CLU ORM2 LAMP2 CFL1 TIMP3 QSOX1 TIMP1 CD36 FGB FGA VWF ACTN2 AHSG ACTN1 SERPINF2 FGG APOA1 MMRN1 PECAM1 SERPING1 GAS6 VCL ITIH4 CD63 PDGFB PDGFA PLG A1BG THBS1 KNG1 CLEC3B APOH PSAP SPP2 A2M LEFTY2 TGFB2 TGFB1 TGFB3 RARRES2 FN1 VEGFA SOD1 HRG PF4	1.1e-43
11	Elastic fibre formation Homo sapiens R-HSA-1566948	8.7e-45	190	19000	FBN2 ITGB1 FBN3 ITGB5 ELN ITGB3 LTBP4 LOXL3 LOXL4 FURIN FBLN1 LTBP2 LTBP3 FBLN2 LTBP1 LOXL1 FBLN5 LOXL2 VTN EFEMP2 EFEMP1 ITGB8 ITGAV ITGB6 TGFB2 TGFB1 TGFB3 BMP7 MFAP5 MFAP4 BMP2 LOX MFAP1 MFAP2 ITGA8 ITGA5 FBN1	8e-43
12	Response to elevated platelet cytosolic Ca2+ Homo sapiens R-HSA-76005	3.4e-44	22	2200	LGALS3BP APP SERPINA3 ECM1 ORM1 SPARC SERPINA1 ITGB3 SERPINE1 ITGA2B F13A1 CLU ORM2 LAMP2 CFL1 TIMP3 QSOX1 TIMP1 CD36 FGB FGA VWF ACTN2 AHSG ACTN1 SERPINF2 FGG APOA1 MMRN1 PECAM1 SERPING1 GAS6 VCL ITIH4 CD63 PDGFB PDGFA PLG A1BG THBS1 KNG1 CLEC3B APOH PSAP SPP2 A2M LEFTY2 TGFB2 TGFB1 TGFB3 RARRES2 FN1 VEGFA SOD1 HRG PF4	2.9e-42
13	Non-integrin membrane-ECM interactions Homo sapiens R-HSA-3000171	7e-44	150	15000	ITGB1 DDR1 LAMA5 LAMA2 ITGB5 SDC4 ITGB4 LAMC3 LAMA1 SDC2 LAMA4 ITGB3 LAMA3 SDC3 TNC PDGFB NTN4 PDGFA LAMC2 LAMC1 THBS1 FGF2 VTN TTR DAG1 ITGAV TGFB1 LAMB3 LAMB2 ACTN1 ITGA2 CASK LAMB1 HSPG2 ITGA6 AGRN DDR2	5.4e-42
14	Activation of Matrix Metalloproteinases Homo sapiens R-HSA-1592389	4.7e-43	610000	59000000	COL18A1 PRSS1 FURIN PLG KLK2 CTSV MMP25 MMP24 CTSK TIMP2 CTSG TIMP1 TPSAB1 PRSS2 ELANE MMP7 MMP1 CMA1 MMP2 CTRB2 MMP3 CTRB1 MMP8 MMP9 MMP10 MMP11 MMP14 MMP13 MMP16 MMP15 MMP17 KLKB1	3.4e-41
15	Hemostasis Homo sapiens R-HSA-109582	3e-41	5.7	530	APP SPARC SERPINE2 SERPINE1 ITGA2B F13A1 F11R CLU PLAU LAMP2 CFL1 BSG ACTN2 ACTN1 PRKCD SERPINF2 SERPING1 PRTN3 TP53 VCL PDGFB PDGFA A1BG PRKCZ GLG1 KNG1 APOH PSAP ABL1 A2M S100A10 TGFB2 TGFB1 TGFB3 RARRES2 CAV1 FN1 L1CAM PTK2 ITGA10 HRG ITGB1 LGALS3BP SERPINA3 ECM1 ORM1 SERPINA1 ITGAM ITGB3 ITGB2 IFNA2 ITGAL ORM2 SERPINA5 SPN C1QBP ITGAX TIMP3 ITGAV QSOX1 TIMP1 CD36 RAC1 FGB FGA ANXA2 ITGA4 VWF …	2e-39
16	Diseases associated with O-glycosylation of proteins Homo sapiens R-HSA-3906995	3.4e-39	40	3600	SPON2 SPON1 NOTCH1 ADAMTS12 CFP THBS2 THBS1 THSD1 ADAMTS10 THSD4 ADAMTSL1 ADAMTS4 ADAMTS16 ADAMTS5 ADAMTS15 ADAMTS2 ADAMTS14 ADAMTS3 ADAMTS13 MUC2 ADAMTSL5 ADAMTS1 ADAMTSL4 ADAMTS19 ADAMTSL3 ADAMTS18 ADAMTSL2 ADAMTS17 DAG1 ADAMTS8 ADAMTS9 MUC4 ADAMTS6 ADAMTS7 MUC6 SBSPON MUC17 MUC5B MUC3A MUC5AC ADAMTS20	2.1e-37
17	Defective B3GALTL causes Peters-plus syndrome (PpS) Homo sapiens R-HSA-5083635	1.6e-37	130	11000	SPON2 SPON1 CFP ADAMTS12 THBS2 THBS1 THSD1 THSD4 ADAMTS10 ADAMTSL1 ADAMTS16 ADAMTS4 ADAMTS5 ADAMTS15 ADAMTS14 ADAMTS2 ADAMTS13 ADAMTS3 ADAMTSL5 ADAMTS1 ADAMTSL4 ADAMTS19 ADAMTS18 ADAMTSL3 ADAMTSL2 ADAMTS17 ADAMTS8 ADAMTS9 ADAMTS6 ADAMTS7 SBSPON ADAMTS20	9.6e-36
18	O-glycosylation of TSR domain-containing proteins Homo sapiens R-HSA-5173214	9.8e-37	110	9000	SPON2 SPON1 CFP ADAMTS12 THBS2 THBS1 THSD1 THSD4 ADAMTS10 ADAMTSL1 ADAMTS16 ADAMTS4 ADAMTS5 ADAMTS15 ADAMTS14 ADAMTS2 ADAMTS13 ADAMTS3 ADAMTSL5 ADAMTS1 ADAMTSL4 ADAMTS19 ADAMTS18 ADAMTSL3 ADAMTSL2 ADAMTS17 ADAMTS8 ADAMTS9 ADAMTS6 ADAMTS7 SBSPON ADAMTS20	5.5e-35
19	Laminin interactions Homo sapiens R-HSA-3000157	4.2e-31	440000	31000000	ITGB1 COL18A1 LAMA5 LAMB3 LAMA2 ITGB4 ITGA3 LAMC3 LAMB2 LAMA1 LAMA4 ITGA2 ITGA1 LAMA3 LAMC2 LAMB1 LAMC1 NID1 NID2 HSPG2 ITGA7 ITGAV ITGA6	2.2e-29
20	Molecules associated with elastic fibres Homo sapiens R-HSA-2129379	1e-30	130	9100	ITGB1 ITGB5 ITGB3 LTBP4 FBLN1 LTBP2 LTBP3 FBLN2 LTBP1 FBLN5 VTN EFEMP2 EFEMP1 ITGB8 ITGAV ITGB6 TGFB2 TGFB1 TGFB3 BMP7 MFAP5 MFAP4 BMP2 MFAP1 MFAP2 ITGA8	5e-29
21	Diseases associated with glycosaminoglycan metabolism Homo sapiens R-HSA-3560782	5.8e-30	240	16000	SDC4 LUM SDC2 NCAN SDC3 OMD BGN PRELP KERA HSPG2 DCN ACAN BCAN VCAN GPC1 OGN GPC3 GPC2 GPC5 CSPG4 GPC4 FMOD AGRN GPC6	2.8e-28
22	Platelet activation, signaling and aggregation Homo sapiens R-HSA-76002	1.5e-29	7.2	480	LGALS3BP APP SERPINA3 ECM1 ORM1 SPARC SERPINA1 ITGB3 SERPINE1 ITGA2B F13A1 ORM2 CLU LAMP2 CFL1 TIMP3 QSOX1 TIMP1 CD36 RAC1 FGB FGA VWF ACTN2 AHSG ACTN1 PRKCD SERPINF2 FGG APOA1 GP1BA F2 RHOA MMRN1 PECAM1 SERPING1 GAS6 VCL CD63 ITIH4 SRC PDGFB PDGFA PLG A1BG PRKCZ THBS1 KNG1 CLEC3B APOH PDPN PSAP SPP2 A2M LEFTY2 TGFB2 TGFB1 TGFB3 RARRES2 FN1 PTK2 VEGFA SOD1 HRG PF4	6.9e-28
23	O-linked glycosylation Homo sapiens R-HSA-5173105	5.5e-26	12	710	SPON2 SPON1 POMT1 CFP ADAMTS12 THBS2 THBS1 THSD1 ADAMTS10 THSD4 ADAMTS16 ADAMTSL1 ADAMTS4 ADAMTS15 ADAMTS5 ADAMTS14 ADAMTS2 ADAMTS13 ADAMTS3 MUC2 ADAMTSL5 ADAMTS19 ADAMTS1 ADAMTSL4 ADAMTS18 ADAMTSL3 ADAMTS17 ADAMTSL2 DAG1 ADAMTS8 ADAMTS9 MUC4 ADAMTS6 ADAMTS7 MUC6 SBSPON MUC17 MUC5B MUC3A MUC5AC ADAMTS20	2.4e-24
24	Disease Homo sapiens R-HSA-1643685	1.9e-24	3.6	200	SPON2 SPON1 IHH FGF1 FGF2 ANTXR1 DAG1 PDGFRA OMD ADAM10 KERA RPSA HSPG2 MUC3A BCR BCAN NOTCH1 SDC4 SDC2 SDC3 PDGFB PDGFA CFP ADAMTS12 FOXO3 ADAMTS10 ADAMTS16 ADAMTS15 ADAMTS14 ADAMTS13 ADAMTS19 ADAMTS18 ADAMTS17 JAG1 TGFB1 SMAD3 FZD4 MUC17 WNT3A IDH1 NFKB2 SNW1 OGN CSPG4 CALR FGFR4 FGFR2 FGF10 NCAN ADAMTSL1 ADAMTS4 ADAMTS5 SHH ADAMTS2 ADAMTS3 ADAMTSL5 ADAMTSL4 ADAMTS1 ADAMTSL3 ADAMTSL2 CD36 RAC1 …	7.9e-23
25	Axon guidance Homo sapiens R-HSA-422475	6.9e-22	4	190	ITGB1 NRP1 NCAN ITGB3 ITGA2B LAMC1 FGF1 FGF2 ACTG1 CFL1 KDR ITGAV RAC1 FGB PDGFRA FGA VWF ACTN2 ITGA2 MMP2 ITGA1 FGG ADAM10 MMP9 RHOA PSMA6 TIAM1 COL4A2 COL4A1 COL4A4 COL6A2 CSNK2B COL4A3 COL6A1 COL4A5 COL6A3 COL6A6 ITGA5 COL6A5 EPHA3 VCL ITGA9 SPTBN4 SEMA7A ROCK1 SRC LAMA1 SDC2 PDGFB NTN4 PDGFA SEMA3E IQGAP1 EFNA5 NTN1 RRAS ERBB4 GPC1 ABL1 MYH11 NCAM1 SLIT2 CLASP1 CLASP2 ANGPT1 FN1 LAMB1 L1CAM P…	2.8e-20
26	Defective B3GALT6 causes EDSP2 and SEMDJL1 Homo sapiens R-HSA-4420332	5.8e-21	170	7900	SDC4 NCAN SDC2 SDC3 BGN HSPG2 DCN BCAN VCAN GPC1 GPC3 GPC2 CSPG4 GPC5 GPC4 AGRN GPC6	2.1e-19
27	Defective B4GALT7 causes EDS, progeroid type Homo sapiens R-HSA-3560783	5.8e-21	170	7900	SDC4 NCAN SDC2 SDC3 BGN HSPG2 DCN BCAN VCAN GPC1 GPC3 GPC2 CSPG4 GPC5 GPC4 AGRN GPC6	2.1e-19
28	Defective B3GAT3 causes JDSSDHD Homo sapiens R-HSA-3560801	5.8e-21	170	7900	SDC4 NCAN SDC2 SDC3 BGN HSPG2 DCN BCAN VCAN GPC1 GPC3 GPC2 CSPG4 GPC5 GPC4 AGRN GPC6	2.1e-19
29	Syndecan interactions Homo sapiens R-HSA-3000170	3.7e-20	110	5100	ITGB1 TGFB1 ITGB5 SDC4 ITGB4 ITGB3 ACTN1 ITGA2 SDC2 SDC3 TNC CASK THBS1 FGF2 VTN ITGAV ITGA6	1.3e-18
30	Developmental Biology Homo sapiens R-HSA-1266738	3.8e-19	3.1	130	ITGA2B FGF1 TNF FGF2 ACTG1 CDH2 CFL1 KDR CER1 CDON PDGFRA ACTN2 ADIPOQ ADAM11 ADAM10 TIAM1 COL4A2 COL4A1 COL4A4 CSNK2B COL4A3 COL4A5 EPHA3 VCL SPTBN4 SEMA7A NOTCH1 SDC2 PDGFB PDGFA IQGAP1 FOXO3 EFNA5 RRAS ABL1 MYH11 TGFB1 SMAD3 FN1 L1CAM PTK2 DLG1 PTPRA ITGA10 COL9A1 NF1 COL9A3 COL9A2 FGFR4 FGFR2 FGF10 MYF5 ITGB1 NRP1 NCAN ITGB3 LAMC1 PCSK6 ITGAV CD36 RAC1 FGB FGA VWF ITGA2 MMP2 ITGA1 FGG MMP9 RH…	1.3e-17
31	Cell surface interactions at the vascular wall Homo sapiens R-HSA-202733	4.1e-19	9.9	420	ITGB1 ITGAM SRC ITGB3 ITGB2 F11R ITGAL GLG1 SPN BSG ITGAX ITGAV JAM2 JAM3 ANGPT4 ANGPT2 ITGA4 ANGPT1 MMP1 ITGA3 CAV1 FN1 L1CAM F2 CEACAM6 PECAM1 ITGA6 ITGA5 CD47 TEK GAS6 CD44 PF4	1.3e-17
32	Glycosaminoglycan metabolism Homo sapiens R-HSA-1630316	2.9e-18	8.3	330	B4GALT1 HPSE2 SDC4 SDC2 NCAN SDC3 PRELP SLC9A1 ACAN GPC1 HAS1 HAS3 GPC3 GPC2 HAS2 GPC5 GPC4 GPC6 CSGALNACT1 LUM OMD BGN KERA HSPG2 LYVE1 DCN EXT1 BCAN VCAN OGN CSPG4 HPSE AGRN FMOD CD44	9e-17
33	Formation of Fibrin Clot (Clotting Cascade) Homo sapiens R-HSA-140877	5.1e-18	23	930	FGB FGA SERPINE2 VWF SERPINC1 F12 FGG F13A1 GP1BA F2 F3 KNG1 SERPINA5 F7 F9 C1QBP SERPING1 PRTN3 A2M KLKB1 PF4	1.6e-16
34	A tetrasaccharide linker sequence is required for GAG synthesis Homo sapiens R-HSA-1971475	7.7e-17	38	1400	SDC4 SDC2 NCAN SDC3 BGN HSPG2 DCN BCAN VCAN GPC1 GPC3 GPC2 GPC5 CSPG4 GPC4 AGRN GPC6	2.3e-15
35	Defective EXT2 causes exostoses 2 Homo sapiens R-HSA-3656237	3.6e-14	220	6800	SDC4 GPC1 SDC2 SDC3 GPC3 GPC2 GPC5 GPC4 AGRN HSPG2 GPC6	1e-12
36	Defective EXT1 causes exostoses 1, TRPS2 and CHDS Homo sapiens R-HSA-3656253	3.6e-14	220	6800	SDC4 GPC1 SDC2 SDC3 GPC3 GPC2 GPC5 GPC4 AGRN HSPG2 GPC6	1e-12
37	Heparan sulfate/heparin (HS-GAG) metabolism Homo sapiens R-HSA-1638091	2.7e-13	12	340	HPSE2 SDC4 NCAN SDC2 SDC3 BGN HSPG2 DCN EXT1 BCAN VCAN GPC1 GPC3 GPC2 GPC5 CSPG4 GPC4 HPSE AGRN GPC6	7.2e-12
38	HS-GAG degradation Homo sapiens R-HSA-2024096	1e-12	32	900	SDC4 HPSE2 SDC2 SDC3 HSPG2 GPC1 GPC3 GPC2 GPC5 HPSE GPC4 AGRN GPC6	2.7e-11
39	Crosslinking of collagen fibrils Homo sapiens R-HSA-2243919	1.4e-12	170000	4700000	BMP1 LOX LOXL3 LOXL4 TLL2 PCOLCE TLL1 LOXL1 LOXL2	3.6e-11
40	Intrinsic Pathway of Fibrin Clot Formation Homo sapiens R-HSA-140837	2.4e-12	29	770	VWF SERPINE2 SERPINC1 F12 GP1BA F2 KNG1 SERPINA5 F9 C1QBP SERPING1 A2M KLKB1	6e-11
41	NCAM signaling for neurite out-growth Homo sapiens R-HSA-375165	2.9e-12	3.9	100	SPTBN4 SRC NCAN ITGB3 ITGA2B PDGFB PDGFA IQGAP1 FGF1 FGF2 ERBB4 NCAM1 FGB PDGFRA FGA VWF ANGPT1 ACTN2 FGG FN1 PTK2 PSMA6 COL4A2 COL4A1 PTPRA COL4A4 COL6A2 COL4A3 COL6A1 COL9A1 NF1 COL4A5 COL6A3 COL9A3 COL6A6 COL9A2 COL6A5 TEK AGRN FGFR4 VCL FGFR2 FGF10	7e-11
42	Retinoid metabolism and transport Homo sapiens R-HSA-975634	3e-12	14	360	LRP1 SDC4 SDC2 SDC3 APOC3 APOA1 APOA4 HSPG2 TTR GPC1 GPC3 GPC2 GPC5 GPC4 APOE AGRN GPC6	7.2e-11
43	NCAM1 interactions Homo sapiens R-HSA-419037	3.8e-12	15	400	NCAN COL4A2 COL4A1 COL4A4 COL6A2 COL4A3 COL6A1 COL9A1 COL4A5 COL6A3 NCAM1 COL9A3 COL6A6 COL9A2 COL6A5 AGRN	9e-11
44	Chondroitin sulfate/dermatan sulfate metabolism Homo sapiens R-HSA-1793185	7.3e-12	11	290	CSGALNACT1 SDC4 NCAN SDC2 SDC3 BGN HSPG2 DCN BCAN VCAN GPC1 GPC3 GPC2 GPC5 CSPG4 GPC4 AGRN GPC6	1.7e-10
45	Signaling by PDGF Homo sapiens R-HSA-186797	7.4e-12	3.3	85	ITGB3 ITGA2B PTEN FGF1 FGF2 FGB PDGFRA FGA VWF ACTN2 PRKCD FGG PSMA6 COL4A2 COL4A1 COL4A4 COL6A2 COL4A3 COL6A1 COL4A5 COL6A3 COL6A6 COL6A5 VCL SPTBN4 SRC PDGFB PDGFA FURIN PLG IQGAP1 FOXO3 THBS2 THBS1 THBS4 THBS3 ERBB4 SPP1 NCAM1 ANGPT1 FN1 PTK2 PTPRA COL9A1 NF1 COL9A3 COL9A2 TEK FGFR4 FGFR2 FGF10	1.7e-10
46	Dissolution of Fibrin Clot Homo sapiens R-HSA-75205	1.7e-11	66	1600	ANXA2 SERPINE2 PLAU SERPINE1 SERPINF2 PLG HRG SERPINB8 SERPINB6 S100A10	3.6e-10
47	Cell-Cell communication Homo sapiens R-HSA-1500931	2.3e-11	5.5	130	COL17A1 ITGB1 CD151 ITGB4 SRC LAMA3 LAMC2 IQGAP1 F11R NTN1 CDH2 CDH1 PTK2B RAC1 ACTN3 JUP DST LAMB3 ACTN2 ACTN1 CASK PTK2 NPHS1 CDH13 CTNNB1 ITGA6 ANG CD47	4.9e-10
48	Metabolism of fat-soluble vitamins Homo sapiens R-HSA-6806667	1.2e-10	10	230	LRP1 SDC4 SDC2 SDC3 APOA1 APOC3 APOA4 HSPG2 TTR GPC1 GPC3 GPC2 GPC5 GPC4 APOE AGRN GPC6	2.4e-09
49	Type I hemidesmosome assembly Homo sapiens R-HSA-446107	2.5e-10	160	3500	COL17A1 CD151 DST LAMB3 ITGB4 LAMA3 LAMC2 ITGA6	5.1e-09
50	Defective CHST6 causes MCDC1 Homo sapiens R-HSA-3656225	6e-10	130000	2800000	ACAN LUM OMD OGN PRELP KERA FMOD	1.1e-08
51	Defective ST3GAL3 causes MCT12 and EIEE15 Homo sapiens R-HSA-3656243	6e-10	130000	2800000	ACAN LUM OMD OGN PRELP KERA FMOD	1.1e-08
52	Defective B4GALT1 causes B4GALT1-CDG (CDG-2d) Homo sapiens R-HSA-3656244	6e-10	130000	2800000	ACAN LUM OMD OGN PRELP KERA FMOD	1.1e-08
53	Anchoring fibril formation Homo sapiens R-HSA-2214320	6e-10	130000	2800000	BMP1 LAMB3 COL7A1 LAMA3 TLL2 LAMC2 TLL1	1.1e-08
54	Signal transduction by L1 Homo sapiens R-HSA-445144	7.1e-10	22	460	ITGB1 NRP1 ITGB3 ITGA2B CSNK2B NCAM1 ITGAV ITGA5 RAC1 L1CAM ITGA9	1.3e-08
55	Metabolism of proteins Homo sapiens R-HSA-392499	7.6e-10	2.1	44	SPON2 APP SPON1 DMBT1 NPPA DAG1 PMPCA CPA3 LMAN1L RPSA HSPG2 MUC3A CSNK2B VDAC1 IGFALS TP53 SPTBN4 CPB2 ARL2 KLK2 ADAMTS12 CFP ADAMTS10 HSP90B1 ADAMTS16 DPP4 ADAMTS15 ADAMTS14 ADAMTS13 ADAMTS19 ADAMTS18 ADAMTS17 HSPA9 MUC17 INHBE CS GH1 CALR TGFBI ACHE SERPINA1 B4GALT1 POMT1 CTSZ ADAMTSL1 ADAMTS4 ADAMTS5 ADAMTS2 ADAMTS3 ADAMTSL5 ADAMTSL4 ADAMTS1 ADAMTSL3 ADAMTSL2 CTSH CTSG ADAMTS8 CTSD ADAMTS9 CT…	1.4e-08
56	Metabolism of carbohydrates Homo sapiens R-HSA-71387	3.2e-09	3.3	64	B4GALT1 HPSE2 SDC4 SDC2 NCAN SDC3 PRELP SLC9A1 ACAN GPC1 HAS1 HAS3 GPC3 GPC2 HAS2 GPC5 GPC4 GPC6 PCK2 CSGALNACT1 MDH2 LUM OMD GOT2 BGN KERA HSPG2 LYVE1 DCN EXT1 BCAN VCAN PKM OGN CSPG4 HPSE FMOD AGRN CD44	5.8e-08
57	Scavenging by Class A Receptors Homo sapiens R-HSA-3000480	4.1e-09	22	430	COLEC12 COL1A1 COL3A1 COL1A2 COL4A2 COL4A1 APOA1 APOE CALR HSP90B1	7.2e-08
58	L1CAM interactions Homo sapiens R-HSA-373760	4.6e-09	5.6	110	ITGB1 NRP1 SPTBN4 SRC LAMA1 NCAN ITGB3 ITGA2 ITGA2B ITGA1 LAMB1 LAMC1 L1CAM DLG1 ITGA10 CSNK2B ITGAV NCAM1 RAC1 ITGA5 ITGA9	8e-08
59	GRB2:SOS provides linkage to MAPK signaling for Integrins Homo sapiens R-HSA-354194	5.3e-09	30	570	FGB FGA VWF SRC ITGB3 FGG ITGA2B FN1 PTK2	8.9e-08
60	p130Cas linkage to MAPK signaling for integrins Homo sapiens R-HSA-372708	5.3e-09	30	570	FGB FGA VWF SRC ITGB3 FGG ITGA2B FN1 PTK2	8.9e-08
61	HS-GAG biosynthesis Homo sapiens R-HSA-2022928	9.1e-09	13	230	EXT1 SDC4 SDC2 GPC1 SDC3 GPC3 GPC2 GPC5 GPC4 AGRN GPC6 HSPG2	1.5e-07
62	Metabolism of vitamins and cofactors Homo sapiens R-HSA-196854	9.9e-09	4.3	79	PRSS1 SDC4 LRP1 SHMT2 SDC2 SDC3 ALDH1L2 TTR HLCS GPC1 GPC3 GPC2 GPC5 APOE GPC4 GPC6 CTRB2 CTRB1 APOA1 APOC3 APOA4 HSPG2 COASY BTD MTHFD2 AGRN	1.6e-07
63	WNT ligand biogenesis and trafficking Homo sapiens R-HSA-3238698	1.2e-08	15	270	WNT6 WNT2B WNT11 WNT5B WNT3A WNT5A WNT8A WNT7A WNT2 WNT3 WNT4	2e-07
64	Post-translational protein modification Homo sapiens R-HSA-597592	1.8e-08	2.5	44	SPON2 SPON1 SERPINA1 B4GALT1 POMT1 CTSZ ADAMTSL1 ADAMTS4 ADAMTS5 ADAMTS2 ADAMTS3 ADAMTSL5 ADAMTSL4 ADAMTS1 ADAMTSL3 ADAMTSL2 DAG1 ADAMTS8 ADAMTS9 ADAMTS6 CTSC ADAMTS7 SBSPON LMAN1L F2 MUC3A MUC5AC ADAMTS20 F7 F9 GAS6 TP53 SPTBN4 FURIN CFP ADAMTS12 THBS2 THSD1 THBS1 ADAMTS10 THSD4 ADAMTS16 ADAMTS15 LMAN1 ADAMTS14 ADAMTS13 MUC2 ADAMTS19 ADAMTS18 ADAMTS17 MUC4 MUC6 MUC17 MUC5B COL7A1 CALR	2.9e-07
65	Signaling by VEGF Homo sapiens R-HSA-194138	2.5e-08	2.9	51	SPTBN4 NRP1 ROCK1 SRC ITGB3 ITGA2B PDGFB PDGFA IQGAP1 FGF1 PRKCZ FGF2 ERBB4 KDR PTK2B ITGAV NCAM1 RAC1 FGB PDGFRA FGA JUP VWF ANGPT1 ACTN2 CAV1 PRKCD FGG FN1 PTK2 RHOA VEGFA PSMA6 PTPRA NF1 CTNNB1 TEK FGFR4 VCL FGFR2 FGF10	3.8e-07
66	Common Pathway of Fibrin Clot Formation Homo sapiens R-HSA-140875	2.5e-08	17	290	FGB FGA SERPINE2 SERPINC1 FGG F13A1 PRTN3 F2 SERPINA5 PF4	3.8e-07
67	VEGFA-VEGFR2 Pathway Homo sapiens R-HSA-4420097	3.7e-08	2.9	50	SPTBN4 ROCK1 SRC ITGB3 ITGA2B PDGFB PDGFA IQGAP1 FGF1 PRKCZ FGF2 ERBB4 KDR PTK2B ITGAV NCAM1 RAC1 FGB PDGFRA FGA JUP VWF ANGPT1 ACTN2 CAV1 PRKCD FGG FN1 PTK2 RHOA VEGFA PSMA6 PTPRA NF1 CTNNB1 TEK FGFR4 VCL FGFR2 FGF10	5.5e-07
68	Signal Transduction Homo sapiens R-HSA-162582	6.5e-08	1.6	27	APP SERPINE1 ITGA2B IHH SPINT2 F11R FGF1 TNF FGF2 ACTG1 CDH1 RUVBL1 KDR PDK4 SOX9 CER1 PDK2 CDON PDGFRA WNT5B ACTN2 PRKCD WNT5A ADAM10 TSC1 HSPG2 BCR TIAM1 SFRP1 SFRP2 SPINT1 COL4A2 RBP3 COL4A1 COL4A4 ADAM12 CSNK2B COL4A3 COL4A5 TP53 VCL SPTBN4 NOTCH1 SDC4 SDC2 HPN SDC3 PDGFB PDGFA IQGAP1 KLK2 FOXO3 PRKCZ KNG1 WNT6 FLRT2 FLRT3 FLRT1 PSAP ABL1 MYH11 APOE A2M WNT2 WNT3 WNT4 JAG1 TGFB1 SMAD3 JUP FZD…	9.6e-07
69	Defective CHST3 causes SEDCJD Homo sapiens R-HSA-3595172	8.4e-08	120	1900	BCAN VCAN NCAN BGN CSPG4 DCN	1.2e-06
70	Defective CHSY1 causes TPBS Homo sapiens R-HSA-3595177	8.4e-08	120	1900	BCAN VCAN NCAN BGN CSPG4 DCN	1.2e-06
71	Defective CHST14 causes EDS, musculocontractural type Homo sapiens R-HSA-3595174	8.4e-08	120	1900	BCAN VCAN NCAN BGN CSPG4 DCN	1.2e-06
72	Keratan sulfate degradation Homo sapiens R-HSA-2022857	3.8e-07	28	410	ACAN LUM OMD OGN PRELP KERA FMOD	5.4e-06
73	VEGFR2 mediated cell proliferation Homo sapiens R-HSA-5218921	4.1e-07	3	44	SPTBN4 SRC ITGB3 ITGA2B PDGFB PDGFA IQGAP1 FGF1 PRKCZ FGF2 ERBB4 KDR NCAM1 FGB PDGFRA FGA VWF ANGPT1 ACTN2 PRKCD FGG FN1 PTK2 VEGFA PSMA6 PTPRA NF1 TEK FGFR4 VCL FGFR2 FGF10	5.7e-06
74	Cell junction organization Homo sapiens R-HSA-446728	6.3e-07	4.9	70	ITGB1 COL17A1 CD151 DST LAMB3 JUP ITGB4 ACTN1 LAMA3 LAMC2 F11R CDH2 CDH1 CDH13 CTNNB1 ITGA6 ANG	8.6e-06
75	Visual phototransduction Homo sapiens R-HSA-2187338	7.9e-07	4.6	64	SDC4 LRP1 SDC2 SDC3 APOA1 APOC3 APOA4 HSPG2 TTR RBP3 GPC1 GPC3 GPC2 GPC5 APOE GPC4 AGRN GPC6	1.1e-05
76	Trafficking and processing of endosomal TLR Homo sapiens R-HSA-1679131	8e-07	23	330	CTSL CTSK CTSV CTSS TLR3 HSP90B1 CTSB	1.1e-05
77	Platelet Aggregation (Plug Formation) Homo sapiens R-HSA-76009	8.5e-07	8.4	120	FGB FGA VWF SRC ITGB3 ITGA2B FGG FN1 GP1BA F2 PTK2	1.1e-05
78	MAPK family signaling cascades Homo sapiens R-HSA-5683057	1.1e-06	2.7	38	SPTBN4 SRC ITGB3 ITGA2B PDGFB PDGFA IQGAP1 FGF1 FOXO3 FGF2 ERBB4 NCAM1 RAC1 FGB PDGFRA FGA VWF ANGPT1 ACTN2 MMP2 FGG FN1 PTK2 MMP10 PSMA6 IL6 PTPRA CDK1 NF1 TEK FGFR4 VCL FGFR2 FGF10	1.4e-05
79	MAPK1/MAPK3 signaling Homo sapiens R-HSA-5684996	2e-06	2.9	38	SPTBN4 SRC ITGB3 ITGA2B PDGFB PDGFA IQGAP1 FGF1 FGF2 ERBB4 NCAM1 FGB PDGFRA FGA VWF ANGPT1 ACTN2 FGG FN1 PTK2 PSMA6 IL6 PTPRA CDK1 NF1 TEK FGFR4 VCL FGFR2 FGF10	2.6e-05
80	Binding and Uptake of Ligands by Scavenger Receptors Homo sapiens R-HSA-2173782	2e-06	5.1	66	COLEC12 SPARC LRP1 AMBP APOA1 HSP90B1 COL1A1 HPX COL3A1 COL1A2 COL4A2 COL4A1 CD36 APOE CALR	2.6e-05
81	EPH-Ephrin signaling Homo sapiens R-HSA-2682334	2.7e-06	4.4	56	ROCK1 SRC MMP2 SDC2 ADAM10 EFNA5 MMP9 RHOA PTK2 ACTG1 VEGFA TIAM1 CFL1 KDR MYH11 RAC1 EPHA3	3.3e-05
82	Negative regulation of TCF-dependent signaling by WNT ligand antagonists Homo sapiens R-HSA-3772470	2.7e-06	17	220	SFRP1 SFRP2 WNT3A WNT5A LRP5 SOST WNT4	3.4e-05
83	Innate Immune System Homo sapiens R-HSA-168249	2.9e-06	1.9	24	FCN1 APP FCN2 FCN3 ITGAM ITGB3 ITGB2 ITGA2B IFNA2 PTEN ICAM2 ICAM3 CTSV FGF1 CLU FGF2 CTSS ACTG1 LGALS3 CTSL CTSK CFL1 CD36 RAC1 PRSS2 MBL2 CTSB FGB PDGFRA FGA DEFB118 VWF ACTN2 PRKCD CD180 FGG PSMA6 TLR4 VCL TLR3 TLR2 C1QB SPTBN4 C1QA SRC PDGFB PDGFA IQGAP1 FOXO3 HSP90B1 VTN ERBB4 ABL1 NCAM1 ANGPT1 FN1 DEFA1 PTK2 NFKB2 CD4 PTPRA BCL2 NF1 CTNNB1 TEK FGFR4 FGFR2 FGF10 C1QC	3.5e-05
84	Integrin alphaIIb beta3 signaling Homo sapiens R-HSA-354192	2.9e-06	9.9	130	FGB FGA VWF SRC ITGB3 ITGA2B FGG FN1 PTK2	3.5e-05
85	Metabolism of Angiotensinogen to Angiotensins Homo sapiens R-HSA-2022377	4.7e-06	15	190	CPA3 CPB2 CMA1 CTSZ CTSG CTSD AGT	5.5e-05
86	Dermatan sulfate biosynthesis Homo sapiens R-HSA-2022923	4.7e-06	24	290	BCAN VCAN NCAN BGN CSPG4 DCN	5.5e-05
87	Interleukin-2 signaling Homo sapiens R-HSA-451927	5e-06	2.7	33	SPTBN4 SRC ITGB3 ITGA2B PDGFB PDGFA IQGAP1 FGF1 FGF2 ERBB4 PTK2B NCAM1 LGALS9 FGB PDGFRA FGA VWF ANGPT1 ACTN2 FGG FN1 PTK2 PSMA6 PTPRA NF1 TEK FGFR4 VCL FGFR2 FGF10	5.8e-05
88	MAP2K and MAPK activation Homo sapiens R-HSA-5674135	9.1e-06	7.1	82	FGB FGA VWF SRC ITGB3 ITGA2B FGG FN1 IQGAP1 VCL	0.0001
89	GRB2 events in EGFR signaling Homo sapiens R-HSA-179812	1e-05	2.7	31	SPTBN4 SRC ITGB3 ITGA2B PDGFB PDGFA IQGAP1 FGF1 FGF2 ERBB4 NCAM1 FGB PDGFRA FGA VWF ANGPT1 ACTN2 FGG FN1 PTK2 PSMA6 PTPRA NF1 TEK FGFR4 VCL FGFR2 FGF10	0.00011
90	SHC1 events in EGFR signaling Homo sapiens R-HSA-180336	1e-05	2.7	31	SPTBN4 SRC ITGB3 ITGA2B PDGFB PDGFA IQGAP1 FGF1 FGF2 ERBB4 NCAM1 FGB PDGFRA FGA VWF ANGPT1 ACTN2 FGG FN1 PTK2 PSMA6 PTPRA NF1 TEK FGFR4 VCL FGFR2 FGF10	0.00011
91	SOS-mediated signalling Homo sapiens R-HSA-112412	1e-05	2.7	31	SPTBN4 SRC ITGB3 ITGA2B PDGFB PDGFA IQGAP1 FGF1 FGF2 ERBB4 NCAM1 FGB PDGFRA FGA VWF ANGPT1 ACTN2 FGG FN1 PTK2 PSMA6 PTPRA NF1 TEK FGFR4 VCL FGFR2 FGF10	0.00011
92	SHC1 events in ERBB4 signaling Homo sapiens R-HSA-1250347	1e-05	2.7	31	SPTBN4 SRC ITGB3 ITGA2B PDGFB PDGFA IQGAP1 FGF1 FGF2 ERBB4 NCAM1 FGB PDGFRA FGA VWF ANGPT1 ACTN2 FGG FN1 PTK2 PSMA6 PTPRA NF1 TEK FGFR4 VCL FGFR2 FGF10	0.00011
93	RAF/MAP kinase cascade Homo sapiens R-HSA-5673001	1e-05	2.7	31	SPTBN4 SRC ITGB3 ITGA2B PDGFB PDGFA IQGAP1 FGF1 FGF2 ERBB4 NCAM1 FGB PDGFRA FGA VWF ANGPT1 ACTN2 FGG FN1 PTK2 PSMA6 PTPRA NF1 TEK FGFR4 VCL FGFR2 FGF10	0.00011
94	FRS-mediated FGFR2 signaling Homo sapiens R-HSA-5654700	1.1e-05	2.7	31	SPTBN4 SRC ITGB3 ITGA2B PDGFB PDGFA IQGAP1 FGF1 FGF2 ERBB4 NCAM1 FGB PDGFRA FGA VWF ANGPT1 ACTN2 FGG FN1 PTK2 PSMA6 PTPRA NF1 TEK FGFR4 VCL FGFR2 FGF10	0.00011
95	FRS-mediated FGFR4 signaling Homo sapiens R-HSA-5654712	1.1e-05	2.7	31	SPTBN4 SRC ITGB3 ITGA2B PDGFB PDGFA IQGAP1 FGF1 FGF2 ERBB4 NCAM1 FGB PDGFRA FGA VWF ANGPT1 ACTN2 FGG FN1 PTK2 PSMA6 PTPRA NF1 TEK FGFR4 VCL FGFR2 FGF10	0.00011
96	FRS-mediated FGFR3 signaling Homo sapiens R-HSA-5654706	1.1e-05	2.7	31	SPTBN4 SRC ITGB3 ITGA2B PDGFB PDGFA IQGAP1 FGF1 FGF2 ERBB4 NCAM1 FGB PDGFRA FGA VWF ANGPT1 ACTN2 FGG FN1 PTK2 PSMA6 PTPRA NF1 TEK FGFR4 VCL FGFR2 FGF10	0.00011
97	FRS-mediated FGFR1 signaling Homo sapiens R-HSA-5654693	1.1e-05	2.7	31	SPTBN4 SRC ITGB3 ITGA2B PDGFB PDGFA IQGAP1 FGF1 FGF2 ERBB4 NCAM1 FGB PDGFRA FGA VWF ANGPT1 ACTN2 FGG FN1 PTK2 PSMA6 PTPRA NF1 TEK FGFR4 VCL FGFR2 FGF10	0.00011
98	Defective GALNT12 causes colorectal cancer 1 (CRCS1) Homo sapiens R-HSA-5083636	1.2e-05	13	140	MUC2 MUC17 MUC5B MUC3A MUC4 MUC5AC MUC6	0.00012
99	Defective GALNT3 causes familial hyperphosphatemic tumoral calcinosis (HFTC) Homo sapiens R-HSA-5083625	1.2e-05	13	140	MUC2 MUC17 MUC5B MUC3A MUC4 MUC5AC MUC6	0.00012
100	ARMS-mediated activation Homo sapiens R-HSA-170984	1.4e-05	2.7	30	SPTBN4 SRC ITGB3 ITGA2B PDGFB PDGFA IQGAP1 FGF1 FGF2 ERBB4 NCAM1 FGB PDGFRA FGA VWF ANGPT1 ACTN2 FGG FN1 PTK2 PSMA6 PTPRA NF1 TEK FGFR4 VCL FGFR2 FGF10	0.00014
101	Signalling to p38 via RIT and RIN Homo sapiens R-HSA-187706	1.4e-05	2.7	30	SPTBN4 SRC ITGB3 ITGA2B PDGFB PDGFA IQGAP1 FGF1 FGF2 ERBB4 NCAM1 FGB PDGFRA FGA VWF ANGPT1 ACTN2 FGG FN1 PTK2 PSMA6 PTPRA NF1 TEK FGFR4 VCL FGFR2 FGF10	0.00014
102	Basigin interactions Homo sapiens R-HSA-210991	1.5e-05	9.3	100	ITGB1 SPN MMP1 ITGA3 CAV1 BSG ITGA6 L1CAM	0.00015
103	Frs2-mediated activation Homo sapiens R-HSA-170968	1.5e-05	2.7	29	SPTBN4 SRC ITGB3 ITGA2B PDGFB PDGFA IQGAP1 FGF1 FGF2 ERBB4 NCAM1 FGB PDGFRA FGA VWF ANGPT1 ACTN2 FGG FN1 PTK2 PSMA6 PTPRA NF1 TEK FGFR4 VCL FGFR2 FGF10	0.00015
104	Platelet Adhesion to exposed collagen Homo sapiens R-HSA-75892	1.6e-05	17	190	ITGB1 VWF ITGA2 ITGA10 ITGA1 GP1BA	0.00015
105	Prolonged ERK activation events Homo sapiens R-HSA-169893	1.7e-05	2.6	29	SPTBN4 SRC ITGB3 ITGA2B PDGFB PDGFA IQGAP1 FGF1 FGF2 ERBB4 NCAM1 FGB PDGFRA FGA VWF ANGPT1 ACTN2 FGG FN1 PTK2 PSMA6 PTPRA NF1 TEK FGFR4 VCL FGFR2 FGF10	0.00017
106	Detoxification of Reactive Oxygen Species Homo sapiens R-HSA-3299685	1.9e-05	7.4	81	PRDX5 GSTP1 GSR CAT ATP7A SOD2 SOD3 TXN2 SOD1	0.00018
107	Signaling by Leptin Homo sapiens R-HSA-2586552	1.9e-05	2.6	28	SPTBN4 SRC ITGB3 ITGA2B PDGFB PDGFA IQGAP1 FGF1 FGF2 ERBB4 NCAM1 FGB PDGFRA FGA VWF ANGPT1 ACTN2 FGG FN1 PTK2 PSMA6 PTPRA NF1 TEK FGFR4 VCL FGFR2 FGF10	0.00018
108	Amyloid fiber formation Homo sapiens R-HSA-977225	1.9e-05	4.7	51	APP FGA APCS APOA1 APOA4 FURIN HSPG2 CST3 TTR NPPA TGFBI MFGE8 SNCA	0.00018
109	Signaling by SCF-KIT Homo sapiens R-HSA-1433557	2e-05	2.3	25	SPTBN4 SRC ITGB3 ITGA2B PDGFB PTEN PDGFA IQGAP1 FGF1 FOXO3 FGF2 ERBB4 NCAM1 RAC1 FGB PDGFRA FGA VWF ANGPT1 ACTN2 CMA1 FGG FN1 MMP9 PTK2 PSMA6 FER PTPRA NF1 TEK FGFR4 VCL FGFR2 FGF10	0.00019
110	Interleukin receptor SHC signaling Homo sapiens R-HSA-912526	2.2e-05	2.6	28	SPTBN4 SRC ITGB3 ITGA2B PDGFB PDGFA IQGAP1 FGF1 FGF2 ERBB4 NCAM1 FGB PDGFRA FGA VWF ANGPT1 ACTN2 FGG FN1 PTK2 PSMA6 PTPRA NF1 TEK FGFR4 VCL FGFR2 FGF10	0.0002
111	Signalling to RAS Homo sapiens R-HSA-167044	2.4e-05	2.6	27	SPTBN4 SRC ITGB3 ITGA2B PDGFB PDGFA IQGAP1 FGF1 FGF2 ERBB4 NCAM1 FGB PDGFRA FGA VWF ANGPT1 ACTN2 FGG FN1 PTK2 PSMA6 PTPRA NF1 TEK FGFR4 VCL FGFR2 FGF10	0.00021
112	EPHA-mediated growth cone collapse Homo sapiens R-HSA-3928663	2.4e-05	7.2	76	ROCK1 SRC KDR MYH11 EFNA5 RHOA PTK2 EPHA3 VEGFA	0.00022
113	Signaling by MST1 Homo sapiens R-HSA-8852405	2.6e-05	79	840	SPINT1 HPN MST1 SPINT2	0.00023
114	Chondroitin sulfate biosynthesis Homo sapiens R-HSA-2022870	2.7e-05	11	110	CSGALNACT1 BCAN VCAN NCAN BGN CSPG4 DCN	0.00023
115	Defective C1GALT1C1 causes Tn polyagglutination syndrome (TNPS) Homo sapiens R-HSA-5083632	2.7e-05	11	110	MUC2 MUC17 MUC5B MUC3A MUC4 MUC5AC MUC6	0.00023
116	CS/DS degradation Homo sapiens R-HSA-2024101	2.7e-05	15	160	BCAN VCAN NCAN BGN CSPG4 DCN	0.00023
117	CHL1 interactions Homo sapiens R-HSA-447041	2.8e-05	25	260	ITGB1 NRP1 ITGA10 ITGA2 ITGA1	0.00024
118	Role of Abl in Robo-Slit signaling Homo sapiens R-HSA-428890	2.8e-05	25	260	GPC1 ABL1 SLIT2 CLASP1 CLASP2	0.00024
119	Keratan sulfate biosynthesis Homo sapiens R-HSA-2022854	2.8e-05	8.4	88	ACAN B4GALT1 LUM OMD OGN PRELP KERA FMOD	0.00024
120	Downstream signaling of activated FGFR1 Homo sapiens R-HSA-5654687	3.1e-05	2.3	24	SPTBN4 SRC ITGB3 ITGA2B PDGFB PTEN PDGFA IQGAP1 FGF1 FOXO3 FGF2 FLRT2 FLRT3 ERBB4 FLRT1 NCAM1 FGB PDGFRA FGA VWF ANGPT1 ACTN2 PRKCD FGG FN1 PTK2 PSMA6 PTPRA NF1 TEK FGFR4 VCL FGFR2 FGF10	0.00026
121	Regulation of Insulin-like Growth Factor (IGF) transport and uptake by Insulin-like Growth Factor Binding Proteins (IGFBPs) Homo sapiens R-HSA-381426	3.8e-05	9.9	100	MMP1 MMP2 PLG CTSG KLK2 IGFALS F2	0.00032
122	Signalling to ERKs Homo sapiens R-HSA-187687	3.9e-05	2.5	25	SPTBN4 SRC ITGB3 ITGA2B PDGFB PDGFA IQGAP1 FGF1 FGF2 ERBB4 NCAM1 FGB PDGFRA FGA VWF ANGPT1 ACTN2 FGG FN1 PTK2 PSMA6 PTPRA NF1 TEK FGFR4 VCL FGFR2 FGF10	0.00033
123	Signaling by FGFR1 Homo sapiens R-HSA-5654736	4e-05	2.3	23	SPTBN4 SRC ITGB3 ITGA2B PDGFB PTEN PDGFA IQGAP1 FGF1 FOXO3 FGF2 FLRT2 FLRT3 ERBB4 FLRT1 NCAM1 FGB PDGFRA FGA VWF ANGPT1 ACTN2 PRKCD FGG FN1 PTK2 PSMA6 PTPRA NF1 TEK FGFR4 VCL FGFR2 FGF10	0.00033
124	Signaling by FGFR Homo sapiens R-HSA-190236	4.4e-05	2.2	22	SPTBN4 SRC ITGB3 ITGA2B PDGFB PTEN PDGFA IQGAP1 FGF1 FOXO3 FGF2 FLRT2 FLRT3 ERBB4 FLRT1 NCAM1 FGFBP3 FGB PDGFRA FGA VWF ANGPT1 ACTN2 PRKCD FGG FN1 PTK2 HNRNPM PSMA6 PTPRA NF1 TEK FGFR4 VCL FGFR2 FGF10	0.00036
125	Class B/2 (Secretin family receptors) Homo sapiens R-HSA-373080	4.6e-05	4	40	RAMP2 WNT2B FZD4 WNT3A WNT5A IHH WNT8A WNT7A WNT6 SHH WNT11 WNT2 WNT3 WNT4	0.00037
126	Removal of aminoterminal propeptides from gamma-carboxylated proteins Homo sapiens R-HSA-159782	5.3e-05	20	190	F7 F9 FURIN F2 GAS6	0.00042
127	FGFR2b ligand binding and activation Homo sapiens R-HSA-190377	5.3e-05	20	190	FGFBP3 FGF1 FGF2 FGFR2 FGF10	0.00042
128	Interleukin-3, 5 and GM-CSF signaling Homo sapiens R-HSA-512988	6.8e-05	2.4	23	SPTBN4 SRC ITGB3 ITGA2B PDGFB PDGFA IQGAP1 FGF1 FGF2 ERBB4 NCAM1 FGB PDGFRA FGA VWF ANGPT1 ACTN2 FGG FN1 PTK2 PSMA6 PTPRA NF1 TEK FGFR4 VCL FGFR2 FGF10	0.00054
129	Fibronectin matrix formation Homo sapiens R-HSA-1566977	7.5e-05	40	380	ITGB1 CEACAM6 FN1 ITGA5	0.00058
130	Lectin pathway of complement activation Homo sapiens R-HSA-166662	7.5e-05	40	380	FCN1 FCN2 FCN3 MBL2	0.00058
131	Gamma-carboxylation, transport, and amino-terminal cleavage of proteins Homo sapiens R-HSA-159854	9.4e-05	17	150	F7 F9 FURIN F2 GAS6	0.00072
132	Hyaluronan metabolism Homo sapiens R-HSA-2142845	9.8e-05	11	100	HAS1 HAS3 HAS2 LYVE1 CD44 SLC9A1	0.00075
133	Keratan sulfate/keratin metabolism Homo sapiens R-HSA-1638074	0.00011	6.6	60	ACAN B4GALT1 LUM OMD OGN PRELP KERA FMOD	0.00081
134	Signaling by EGFR Homo sapiens R-HSA-177929	0.00012	2.1	19	SPTBN4 SRC ITGB3 ITGA2B PDGFB PTEN PDGFA IQGAP1 FGF1 FOXO3 FGF2 ERBB4 LRIG1 NCAM1 FGB PDGFRA FGA VWF ANGPT1 ACTN2 PRKCD FGG FN1 ADAM10 PTK2 PSMA6 PTPRA ADAM12 NF1 TEK FGFR4 VCL FGFR2 FGF10	0.0009
135	IRS-mediated signalling Homo sapiens R-HSA-112399	0.00012	2.3	21	SPTBN4 SRC ITGB3 ITGA2B PDGFB PDGFA IQGAP1 FGF1 FGF2 ERBB4 NCAM1 FGB PDGFRA FGA VWF ANGPT1 ACTN2 FGG FN1 TSC1 PTK2 PSMA6 PTPRA NF1 TEK FGFR4 VCL FGFR2 FGF10	0.00092
136	Peptide hormone metabolism Homo sapiens R-HSA-2980736	0.00013	3.8	34	CPA3 ACHE CPB2 EXOC8 CMA1 CTSZ AGT INHBE DPP4 GH1 CTNNB1 CTSG CTSD	0.00094
137	EPHB-mediated forward signaling Homo sapiens R-HSA-3928662	0.00015	5.4	48	TIAM1 ROCK1 SRC SDC2 CFL1 RAC1 RHOA PTK2 ACTG1	0.0011
138	Insulin receptor signalling cascade Homo sapiens R-HSA-74751	0.00015	2.3	20	SPTBN4 SRC ITGB3 ITGA2B PDGFB PDGFA IQGAP1 FGF1 FGF2 ERBB4 NCAM1 FGB PDGFRA FGA VWF ANGPT1 ACTN2 FGG FN1 TSC1 PTK2 PSMA6 PTPRA NF1 TEK FGFR4 VCL FGFR2 FGF10	0.0011
139	Signaling by ERBB4 Homo sapiens R-HSA-1236394	0.00015	2.2	19	SPTBN4 SRC ITGB3 ITGA2B PDGFB PTEN PDGFA IQGAP1 FGF1 FOXO3 FGF2 ERBB4 NCAM1 FGB PDGFRA FGA VWF ANGPT1 ACTN2 FGG FN1 PTK2 PSMA6 GH1 CXCL12 PTPRA NF1 TEK FGFR4 VCL FGFR2 FGF10	0.0011
140	IGF1R signaling cascade Homo sapiens R-HSA-2428924	0.00016	2.2	20	SPTBN4 SRC ITGB3 ITGA2B PDGFB PDGFA IQGAP1 FGF1 FGF2 ERBB4 NCAM1 FGB PDGFRA FGA VWF ANGPT1 ACTN2 FGG FN1 TSC1 PTK2 PSMA6 PTPRA NF1 TEK FGFR4 VCL FGFR2 FGF10	0.0011
141	Signaling by Type 1 Insulin-like Growth Factor 1 Receptor (IGF1R) Homo sapiens R-HSA-2404192	0.00016	2.2	20	SPTBN4 SRC ITGB3 ITGA2B PDGFB PDGFA IQGAP1 FGF1 FGF2 ERBB4 NCAM1 FGB PDGFRA FGA VWF ANGPT1 ACTN2 FGG FN1 TSC1 PTK2 PSMA6 PTPRA NF1 TEK FGFR4 VCL FGFR2 FGF10	0.0011
142	IRS-related events triggered by IGF1R Homo sapiens R-HSA-2428928	0.00016	2.2	20	SPTBN4 SRC ITGB3 ITGA2B PDGFB PDGFA IQGAP1 FGF1 FGF2 ERBB4 NCAM1 FGB PDGFRA FGA VWF ANGPT1 ACTN2 FGG FN1 TSC1 PTK2 PSMA6 PTPRA NF1 TEK FGFR4 VCL FGFR2 FGF10	0.0011
143	FCERI mediated MAPK activation Homo sapiens R-HSA-2871796	0.00017	2.2	19	SPTBN4 SRC ITGB3 ITGA2B PDGFB PDGFA IQGAP1 FGF1 FGF2 ERBB4 NCAM1 RAC1 FGB PDGFRA FGA VWF ANGPT1 ACTN2 FGG FN1 PTK2 PSMA6 PTPRA NF1 TEK FGFR4 VCL FGFR2 FGF10	0.0012
144	Termination of O-glycan biosynthesis Homo sapiens R-HSA-977068	0.00018	7.3	63	MUC2 MUC17 MUC5B MUC4 MUC3A MUC5AC MUC6	0.0012
145	Signaling by NODAL Homo sapiens R-HSA-1181150	0.0002	9.1	78	SMAD3 FURIN FOXO3 PCSK6 LEFTY2 CER1	0.0014
146	Immune System Homo sapiens R-HSA-168256	0.00023	1.5	12	FCN1 APP FCN2 FCN3 ITGA2B ICAM2 ICAM3 ICAM4 ICAM5 FGF1 CLU TNF FGF2 ICAM1 ACTG1 LGALS3 CDH1 CFL1 LGALS9 SKP2 PRSS2 PDGFRA DEFB118 ACTN2 PRKCD CD180 PRTN3 VCL SPTBN4 PDGFB PDGFA TNFRSF11B IQGAP1 FOXO3 HSP90B1 VTN ABL1 VCAM1 FN1 DEFA1 PTK2 NFKB2 GH1 IL6 PTPRA IL7 BCL2 NF1 CALR FGFR4 CD200 FGFR2 FGF10 ITGB1 ITGAM EDA ITGB5 ITGB3 ITGB2 IFNA2 PTEN PTPRJ CTSV ITGAL CD3E CTSS CTSL CTSK CTSH ITGAV ITGB7 …	0.0016
147	Downstream signaling of activated FGFR2 Homo sapiens R-HSA-5654696	0.00031	2.1	17	SPTBN4 SRC ITGB3 ITGA2B PDGFB PTEN PDGFA IQGAP1 FGF1 FOXO3 FGF2 ERBB4 NCAM1 FGB PDGFRA FGA VWF ANGPT1 ACTN2 PRKCD FGG FN1 PTK2 PSMA6 PTPRA NF1 TEK FGFR4 VCL FGFR2 FGF10	0.0021
148	Downstream signaling of activated FGFR4 Homo sapiens R-HSA-5654716	0.00031	2.1	17	SPTBN4 SRC ITGB3 ITGA2B PDGFB PTEN PDGFA IQGAP1 FGF1 FOXO3 FGF2 ERBB4 NCAM1 FGB PDGFRA FGA VWF ANGPT1 ACTN2 PRKCD FGG FN1 PTK2 PSMA6 PTPRA NF1 TEK FGFR4 VCL FGFR2 FGF10	0.0021
149	Downstream signaling of activated FGFR3 Homo sapiens R-HSA-5654708	0.00031	2.1	17	SPTBN4 SRC ITGB3 ITGA2B PDGFB PTEN PDGFA IQGAP1 FGF1 FOXO3 FGF2 ERBB4 NCAM1 FGB PDGFRA FGA VWF ANGPT1 ACTN2 PRKCD FGG FN1 PTK2 PSMA6 PTPRA NF1 TEK FGFR4 VCL FGFR2 FGF10	0.0021
150	DAP12 signaling Homo sapiens R-HSA-2424491	0.00032	2.1	17	SPTBN4 SRC ITGB3 ITGA2B PDGFB PTEN PDGFA IQGAP1 FGF1 FOXO3 FGF2 ERBB4 NCAM1 RAC1 FGB PDGFRA FGA VWF ANGPT1 ACTN2 PRKCD FGG FN1 PTK2 PSMA6 PTPRA NF1 TEK FGFR4 VCL FGFR2 FGF10	0.0021
151	Semaphorin interactions Homo sapiens R-HSA-373755	0.00034	3.9	31	ITGB1 NRP1 SEMA7A ROCK1 RRAS CFL1 ITGA1 SEMA3E MYH11 RAC1 RHOA	0.0023
152	Signaling by FGFR2 Homo sapiens R-HSA-5654738	0.00035	2	16	SPTBN4 SRC ITGB3 ITGA2B PDGFB PTEN PDGFA IQGAP1 FGF1 FOXO3 FGF2 ERBB4 NCAM1 FGFBP3 FGB PDGFRA FGA VWF ANGPT1 ACTN2 PRKCD FGG FN1 PTK2 HNRNPM PSMA6 PTPRA NF1 TEK FGFR4 VCL FGFR2 FGF10	0.0023
153	Signaling by FGFR4 Homo sapiens R-HSA-5654743	0.00036	2.1	16	SPTBN4 SRC ITGB3 ITGA2B PDGFB PTEN PDGFA IQGAP1 FGF1 FOXO3 FGF2 ERBB4 NCAM1 FGB PDGFRA FGA VWF ANGPT1 ACTN2 PRKCD FGG FN1 PTK2 PSMA6 PTPRA NF1 TEK FGFR4 VCL FGFR2 FGF10	0.0024
154	Signaling by Interleukins Homo sapiens R-HSA-449147	0.00037	2	16	SPTBN4 SRC ITGB3 ITGA2B PDGFB PDGFA IQGAP1 FGF1 FGF2 ERBB4 PTK2B NCAM1 LGALS9 FGB PDGFRA FGA VWF ANGPT1 ACTN2 FGG FN1 PTK2 NFKB2 PSMA6 IL6 CD4 PTPRA IL7 NF1 PRTN3 TEK FGFR4 VCL FGFR2 FGF10	0.0024
155	Signaling by FGFR3 Homo sapiens R-HSA-5654741	0.00038	2.1	16	SPTBN4 SRC ITGB3 ITGA2B PDGFB PTEN PDGFA IQGAP1 FGF1 FOXO3 FGF2 ERBB4 NCAM1 FGB PDGFRA FGA VWF ANGPT1 ACTN2 PRKCD FGG FN1 PTK2 PSMA6 PTPRA NF1 TEK FGFR4 VCL FGFR2 FGF10	0.0025
156	Nephrin interactions Homo sapiens R-HSA-373753	0.00048	7.4	57	ACTN3 NPHS1 ACTN2 ACTN1 CASK IQGAP1	0.0031
157	Transport of gamma-carboxylated protein precursors from the endoplasmic reticulum to the Golgi apparatus Homo sapiens R-HSA-159763	0.00056	16	120	F7 F9 F2 GAS6	0.0036
158	Signaling by Insulin receptor Homo sapiens R-HSA-74752	0.00057	2.1	15	SPTBN4 SRC ITGB3 ITGA2B PDGFB PDGFA IQGAP1 FGF1 FGF2 ERBB4 NCAM1 FGB PDGFRA FGA VWF ANGPT1 ACTN2 FGG FN1 TSC1 PTK2 PSMA6 PTPRA NF1 TEK FGFR4 VCL FGFR2 FGF10	0.0036
159	Downstream signal transduction Homo sapiens R-HSA-186763	0.00057	2	15	SPTBN4 SRC ITGB3 ITGA2B PDGFB PTEN PDGFA IQGAP1 FGF1 FOXO3 FGF2 ERBB4 NCAM1 FGB PDGFRA FGA VWF ANGPT1 ACTN2 PRKCD FGG FN1 PTK2 PSMA6 PTPRA NF1 TEK FGFR4 VCL FGFR2 FGF10	0.0036
160	DAP12 interactions Homo sapiens R-HSA-2172127	0.00066	2	14	SPTBN4 SRC ITGB3 ITGA2B PDGFB PTEN PDGFA IQGAP1 FGF1 FOXO3 FGF2 ERBB4 NCAM1 RAC1 FGB PDGFRA FGA VWF ANGPT1 ACTN2 PRKCD FGG FN1 PTK2 PSMA6 PTPRA NF1 TEK FGFR4 VCL FGFR2 FGF10	0.0042
161	TGF-beta receptor signaling in EMT (epithelial to mesenchymal transition) Homo sapiens R-HSA-2173791	0.00073	9	65	TGFB1 F11R PRKCZ RHOA TGFBR1	0.0045
162	Smooth Muscle Contraction Homo sapiens R-HSA-445355	0.00085	5.3	38	ANXA1 ITGB5 ANXA2 ITGA1 ANXA6 MYH11 VCL	0.0053
163	Interaction With The Zona Pellucida Homo sapiens R-HSA-1300644	0.0009	13	92	B4GALT1 ZP1 ZP3 ZP2	0.0055
164	Gamma-carboxylation of protein precursors Homo sapiens R-HSA-159740	0.0009	13	92	F7 F9 F2 GAS6	0.0055
165	Chylomicron-mediated lipid transport Homo sapiens R-HSA-174800	0.00099	8.2	57	APOC3 APOA1 APOA4 APOE HSPG2	0.006
166	Lipoprotein metabolism Homo sapiens R-HSA-174824	0.001	5.1	35	BMP1 APOC3 APOA1 APOA4 APOE A2M HSPG2	0.0062
167	Hyaluronan biosynthesis and export Homo sapiens R-HSA-2142850	0.001	30	200	HAS1 HAS3 HAS2	0.0062
168	Extrinsic Pathway of Fibrin Clot Formation Homo sapiens R-HSA-140834	0.001	30	200	F7 F9 F3	0.0062
169	Ficolins bind to repetitive carbohydrate structures on the target cell surface Homo sapiens R-HSA-2855086	0.001	30	200	FCN1 FCN2 FCN3	0.0062
170	Signalling by NGF Homo sapiens R-HSA-166520	0.0012	1.8	12	SPTBN4 SRC ITGB3 ITGA2B PDGFB PTEN PDGFA FURIN IQGAP1 FGF1 FOXO3 PCSK6 FGF2 ERBB4 NCAM1 RAC1 FGB LINGO1 PDGFRA FGA VWF ANGPT1 ACTN2 PRKCD FGG FN1 PTK2 RHOA PSMA6 TIAM1 PTPRA NF1 TEK FGFR4 VCL FGFR2 FGF10	0.007
171	NGF signalling via TRKA from the plasma membrane Homo sapiens R-HSA-187037	0.0013	1.9	12	SPTBN4 SRC ITGB3 ITGA2B PDGFB PTEN PDGFA IQGAP1 FGF1 FOXO3 FGF2 ERBB4 NCAM1 FGB PDGFRA FGA VWF ANGPT1 ACTN2 PRKCD FGG FN1 PTK2 RHOA PSMA6 PTPRA NF1 TEK FGFR4 VCL FGFR2 FGF10	0.0077
172	RHO GTPases activate IQGAPs Homo sapiens R-HSA-5626467	0.0014	11	75	CDH1 CTNNB1 RAC1 IQGAP1	0.008
173	Immunoregulatory interactions between a Lymphoid and a non-Lymphoid cell Homo sapiens R-HSA-198933	0.0016	2.4	16	ITGB1 VCAM1 ITGA4 ITGB2 ICAM2 ICAM3 ICAM4 ICAM5 CD3E ITGAL ICAM1 CDH1 MADCAM1 ITGB7 SIGLEC1 CD34 CD200	0.0091
174	Diseases of signal transduction Homo sapiens R-HSA-5663202	0.0017	2	13	NOTCH1 PDGFB IHH LRP5 PDGFA FGF1 FOXO3 FGF2 SHH TTR ERBB4 PDGFRA JAG1 TGFB1 SMAD3 FZD4 WNT3A ADAM10 TGFBR1 BCR PSMA6 SNW1 CTNNB1 FGFR4 FGFR2 FGF10	0.0098
175	HDL-mediated lipid transport Homo sapiens R-HSA-194223	0.0017	7.1	45	BMP1 APOC3 APOA1 APOE A2M	0.0098
176	Citric acid cycle (TCA cycle) Homo sapiens R-HSA-71403	0.0017	7.1	45	CS FH SUCLA2 MDH2 IDH2	0.0098
177	Apoptotic cleavage of cellular proteins Homo sapiens R-HSA-111465	0.0017	4.6	29	ROCK1 CDH1 PRKCD GAS2 CTNNB1 VIM PTK2	0.0099
178	EPH-ephrin mediated repulsion of cells Homo sapiens R-HSA-3928665	0.0019	4	25	TIAM1 SRC MMP2 ADAM10 RAC1 EFNA5 MMP9 EPHA3	0.011
179	Pyruvate metabolism and Citric Acid (TCA) cycle Homo sapiens R-HSA-71406	0.0019	4	25	CS FH SUCLA2 MDH2 BSG IDH2 PDK4 PDK2	0.011
180	PECAM1 interactions Homo sapiens R-HSA-210990	0.002	9.9	62	SRC ITGB3 PECAM1 ITGAV	0.011
181	FGFR1b ligand binding and activation Homo sapiens R-HSA-190370	0.002	20	120	FGF1 FGF2 FGF10	0.011
182	TNFR1-mediated ceramide production Homo sapiens R-HSA-5626978	0.002	20	120	SMPD3 TNF TNFRSF1A	0.011
183	SMAD2/3 Phosphorylation Motif Mutants in Cancer Homo sapiens R-HSA-3304356	0.002	20	120	TGFB1 SMAD3 TGFBR1	0.011
184	Gastrin-CREB signalling pathway via PKC and MAPK Homo sapiens R-HSA-881907	0.002	1.8	11	APP SPTBN4 SRC ITGB3 ITGA2B PDGFB PDGFA IQGAP1 FGF1 FGF2 KNG1 ERBB4 NCAM1 FGB PDGFRA FGA ANXA1 VWF ANGPT1 ACTN2 PRKCD MMP3 FGG FN1 F2 AGT PTK2 PSMA6 PTPRA NF1 TEK FGFR4 VCL FGFR2 FGF10	0.011
185	FGFR2 ligand binding and activation Homo sapiens R-HSA-190241	0.0022	6.6	40	FGF1 FGFBP3 FGF2 FGFR2 FGF10	0.012
186	Myogenesis Homo sapiens R-HSA-525793	0.0023	5.2	31	CDH2 ABL1 CTNNB1 NTN3 CDON MYF5	0.012
187	CDO in myogenesis Homo sapiens R-HSA-375170	0.0023	5.2	31	CDH2 ABL1 CTNNB1 NTN3 CDON MYF5	0.012
188	Constitutive Signaling by Aberrant PI3K in Cancer Homo sapiens R-HSA-2219530	0.0025	3.4	21	PDGFRA ERBB4 PDGFB PDGFA FGF1 FGFR4 FGF2 FGFR2 FGF10	0.013
189	Cytokine Signaling in Immune system Homo sapiens R-HSA-1280215	0.0026	1.6	9.5	SPTBN4 EDA SRC ITGB3 ITGA2B IFNA2 PDGFB PDGFA TNFRSF11B IQGAP1 FGF1 TNF FGF2 ICAM1 ERBB4 PTK2B NCAM1 LGALS9 FGB PDGFRA FGA VCAM1 VWF ANGPT1 ACTN2 PRKCD FGG FN1 TNFRSF1B PTK2 NFKB2 TNFRSF1A PSMA6 GH1 IL6 CD4 PTPRA IL7 NF1 PRTN3 TEK FGFR4 CD44 VCL FGFR2 FGF10	0.014
190	Signal regulatory protein (SIRP) family interactions Homo sapiens R-HSA-391160	0.0027	8.8	52	SRC PTK2B CD47 PTK2	0.014
191	Toll-Like Receptors Cascades Homo sapiens R-HSA-168898	0.0032	2.4	14	APP ITGAM CD180 ITGB2 CTSV CTSS HSP90B1 NFKB2 CTSL CTSK CD36 TLR4 TLR3 CTSB TLR2	0.017
192	Adherens junctions interactions Homo sapiens R-HSA-418990	0.0033	4.8	27	CDH2 JUP CDH1 CDH13 CTNNB1 ANG	0.017
193	Signaling by NOTCH1 t(7;9)(NOTCH1:M1580 K2555) Translocation Mutant Homo sapiens R-HSA-2660825	0.0034	15	84	NOTCH1 JAG1 ADAM10	0.017
194	Constitutive Signaling by NOTCH1 t(7;9)(NOTCH1:M1580 K2555) Translocation Mutant Homo sapiens R-HSA-2660826	0.0034	15	84	NOTCH1 JAG1 ADAM10	0.017
195	Loss of Function of TGFBR1 in Cancer Homo sapiens R-HSA-3656534	0.0034	15	84	TGFB1 SMAD3 TGFBR1	0.017
196	TGFBR1 KD Mutants in Cancer Homo sapiens R-HSA-3656532	0.0034	15	84	TGFB1 SMAD3 TGFBR1	0.017
197	Loss of Function of SMAD2/3 in Cancer Homo sapiens R-HSA-3304349	0.0034	15	84	TGFB1 SMAD3 TGFBR1	0.017
198	SMAD2/3 MH2 Domain Mutants in Cancer Homo sapiens R-HSA-3315487	0.0034	15	84	TGFB1 SMAD3 TGFBR1	0.017
199	DCC mediated attractive signaling Homo sapiens R-HSA-418885	0.0037	7.9	44	SRC RAC1 NTN1 PTK2	0.019
200	Signaling by Robo receptor Homo sapiens R-HSA-376176	0.0038	4.6	25	GPC1 ABL1 SLIT2 RAC1 CLASP1 CLASP2	0.019
201	Negative regulation of the PI3K/AKT network Homo sapiens R-HSA-199418	0.004	2.8	15	PDGFRA SRC ERBB4 PTEN PDGFB PDGFA FGF1 FGFR4 FGF2 FGFR2 FGF10	0.02
202	Cargo concentration in the ER Homo sapiens R-HSA-5694530	0.0045	4.4	24	LMAN1 SERPINA1 LMAN1L COL7A1 CTSZ CTSC	0.023
203	Diseases associated with the TLR signaling cascade Homo sapiens R-HSA-5602358	0.0051	5.2	27	CD36 TLR4 TLR3 NFKB2 TLR2	0.025
204	Diseases of Immune System Homo sapiens R-HSA-5260271	0.0051	5.2	27	CD36 TLR4 TLR3 NFKB2 TLR2	0.025
205	Release of Hh-Np from the secreting cell Homo sapiens R-HSA-5362798	0.0052	12	62	SHH IHH GPC5	0.025
206	Ligand-receptor interactions Homo sapiens R-HSA-5632681	0.0052	12	62	SHH IHH CDON	0.025
207	RNF mutants show enhanced WNT signaling and proliferation Homo sapiens R-HSA-5340588	0.0052	12	62	FZD4 WNT3A LRP5	0.025
208	Sema4D mediated inhibition of cell attachment and migration Homo sapiens R-HSA-416550	0.0052	12	62	RRAS RAC1 RHOA	0.025
209	Signaling by TGF-beta Receptor Complex in Cancer Homo sapiens R-HSA-3304351	0.0052	12	62	TGFB1 SMAD3 TGFBR1	0.025
210	Cross-presentation of particulate exogenous antigens (phagosomes) Homo sapiens R-HSA-1236973	0.0052	12	62	ITGB5 ITGAV CD36	0.025
211	Ketone body metabolism Homo sapiens R-HSA-74182	0.0052	12	62	HMGCL OXCT1 ACAT1	0.025
212	Fc epsilon receptor (FCERI) signaling Homo sapiens R-HSA-2454202	0.0056	1.7	8.8	SPTBN4 SRC ITGB3 ITGA2B PDGFB PTEN PDGFA IQGAP1 FGF1 FOXO3 FGF2 ERBB4 NCAM1 RAC1 FGB PDGFRA FGA VWF ANGPT1 ACTN2 FGG FN1 PTK2 PSMA6 PTPRA NF1 TEK FGFR4 VCL FGFR2 FGF10	0.027
213	PI5P, PP2A and IER3 Regulate PI3K/AKT Signaling Homo sapiens R-HSA-6811558	0.0066	2.7	14	PDGFRA SRC ERBB4 PDGFB PDGFA FGF1 FGFR4 FGF2 FGFR2 FGF10	0.031
214	Lipid digestion, mobilization, and transport Homo sapiens R-HSA-73923	0.007	2.9	14	FABP1 BMP1 CAV1 APOA1 APOC3 APOA4 APOE A2M HSPG2	0.033
215	Fertilization Homo sapiens R-HSA-1187000	0.0073	4.7	23	ACR B4GALT1 ZP1 ZP3 ZP2	0.034
216	Reproduction Homo sapiens R-HSA-1474165	0.0073	4.7	23	ACR B4GALT1 ZP1 ZP3 ZP2	0.034
217	Attenuation phase Homo sapiens R-HSA-3371568	0.0073	4.7	23	DNAJB6 HSPA1L MRPL18 SERPINH1 COL4A6	0.034
218	PI3K/AKT activation Homo sapiens R-HSA-198203	0.0074	2.3	11	PDGFRA SRC PDGFB PTEN PDGFA FGF1 FOXO3 FGF2 RHOA ERBB4 FGFR4 FGFR2 FGF10	0.034
219	Alpha-defensins Homo sapiens R-HSA-1462054	0.0076	9.9	48	CD4 DEFA1 PRSS2	0.035
220	Inactivation of Cdc42 and Rac Homo sapiens R-HSA-428543	0.0076	9.9	48	GPC1 SLIT2 RAC1	0.035
221	Activated point mutants of FGFR2 Homo sapiens R-HSA-2033519	0.0078	6.1	30	FGF1 FGF2 FGFR2 FGF10	0.035
222	Signaling by TGF-beta Receptor Complex Homo sapiens R-HSA-170834	0.0084	2.8	13	TGFB1 SMAD3 SNW1 SERPINE1 FURIN F11R PRKCZ RHOA TGFBR1	0.038
223	PI3K/AKT Signaling in Cancer Homo sapiens R-HSA-2219528	0.0084	2.6	12	PDGFRA ERBB4 PDGFB PDGFA FGF1 FOXO3 FGFR4 FGF2 FGFR2 FGF10	0.038
224	Sema4D in semaphorin signaling Homo sapiens R-HSA-400685	0.0087	4.5	21	ROCK1 RRAS MYH11 RAC1 RHOA	0.039
225	Creation of C4 and C2 activators Homo sapiens R-HSA-166786	0.0088	3.3	16	FCN1 C1QB FCN2 C1QA FCN3 MBL2 C1QC	0.039
226	Signaling by Wnt Homo sapiens R-HSA-195721	0.009	1.8	8.3	WNT2B WNT5B FZD4 WNT3A CAV1 WNT5A WNT8A LRP5 WNT7A RHOA PSMA6 WNT6 SFRP1 SFRP2 WNT11 CSNK2B RUVBL1 CTNNB1 SOX9 RAC1 SOST WNT2 WNT3 WNT4	0.04
227	Tie2 Signaling Homo sapiens R-HSA-210993	0.0096	5.6	26	ANGPT4 ANGPT2 ANGPT1 TEK	0.043
228	Netrin mediated repulsion signals Homo sapiens R-HSA-418886	0.01	8.5	39	SRC NTN1 PTK2	0.046
229	GP1b-IX-V activation signalling Homo sapiens R-HSA-430116	0.01	8.5	39	VWF SRC GP1BA	0.046
230	Apoptotic execution phase Homo sapiens R-HSA-75153	0.011	3.2	14	ROCK1 CDH1 PRKCD GAS2 CTNNB1 VIM PTK2	0.048
231	Other semaphorin interactions Homo sapiens R-HSA-416700	0.012	5.3	23	ITGB1 SEMA7A ITGA1 SEMA3E	0.051
232	HSF1 activation Homo sapiens R-HSA-3371511	0.012	4.1	18	DNAJB6 HSPA1L MRPL18 SERPINH1 COL4A6	0.051
233	Metabolism Homo sapiens R-HSA-1430728	0.013	1.3	5.5	PRSS1 HPSE2 ACSM1 NUDT1 ALDH1L2 BSG PDK4 CYP1B1 ACAA1 HADH PDK2 CSGALNACT1 GSTK1 CTRB2 ACOT11 CTRB1 OMD ADIPOQ KERA RPSA HSPG2 GNPAT BCAN PHOSPHO1 BTD MTHFD2 ALDH7A1 SDC4 SHMT2 SDC2 SDC3 ARL2 IQGAP1 ACAT1 SLC9A1 HLCS PSAP APOE A2M PCK2 CAV1 IDH1 EPHX2 GOT2 IDH2 CS EXT1 GLUD1 GRHPR BMP1 CPS1 ARL2BP NDUFAF7 OGN CSPG4 HPSE ACHE B4GALT1 NCAN PTEN SMPD3 ALDH2 CD36 BCKDHB CAD BGN APOA1 APOA4 COASY DCN …	0.055
234	MyD88 deficiency (TLR2/4) Homo sapiens R-HSA-5602498	0.014	7.4	32	CD36 TLR4 TLR2	0.059
235	IRAK4 deficiency (TLR2/4) Homo sapiens R-HSA-5603041	0.014	7.4	32	CD36 TLR4 TLR2	0.059
236	Netrin-1 signaling Homo sapiens R-HSA-373752	0.015	3.3	14	SRC NTN4 SLIT2 RAC1 NTN1 PTK2	0.062
237	Complement cascade Homo sapiens R-HSA-166658	0.015	2.5	11	FCN1 C1QB FCN2 C1QA VTN FCN3 CLU MBL2 C1QC	0.062
238	PI-3K cascade:FGFR1 Homo sapiens R-HSA-5654689	0.015	2.2	9.1	PDGFRA SRC ERBB4 PDGFB PTEN PDGFA FGF1 FOXO3 FGFR4 FGF2 FGFR2 FGF10	0.062
239	PI-3K cascade:FGFR3 Homo sapiens R-HSA-5654710	0.015	2.2	9.1	PDGFRA SRC ERBB4 PDGFB PTEN PDGFA FGF1 FOXO3 FGFR4 FGF2 FGFR2 FGF10	0.062
240	PI3K events in ERBB4 signaling Homo sapiens R-HSA-1250342	0.015	2.2	9.1	PDGFRA SRC ERBB4 PDGFB PTEN PDGFA FGF1 FOXO3 FGFR4 FGF2 FGFR2 FGF10	0.062
241	PIP3 activates AKT signaling Homo sapiens R-HSA-1257604	0.015	2.2	9.1	PDGFRA SRC ERBB4 PDGFB PTEN PDGFA FGF1 FOXO3 FGFR4 FGF2 FGFR2 FGF10	0.062
242	PI-3K cascade:FGFR4 Homo sapiens R-HSA-5654720	0.015	2.2	9.1	PDGFRA SRC ERBB4 PDGFB PTEN PDGFA FGF1 FOXO3 FGFR4 FGF2 FGFR2 FGF10	0.062
243	PI-3K cascade:FGFR2 Homo sapiens R-HSA-5654695	0.015	2.2	9.1	PDGFRA SRC ERBB4 PDGFB PTEN PDGFA FGF1 FOXO3 FGFR4 FGF2 FGFR2 FGF10	0.062
244	Disassembly of the destruction complex and recruitment of AXIN to the membrane Homo sapiens R-HSA-4641262	0.016	3.8	16	WNT3A CAV1 LRP5 WNT8A CTNNB1	0.064
245	Hyaluronan uptake and degradation Homo sapiens R-HSA-2160916	0.018	6.6	27	LYVE1 CD44 SLC9A1	0.073
246	Endosomal/Vacuolar pathway Homo sapiens R-HSA-1236977	0.018	6.6	27	CTSL CTSV CTSS	0.073
247	GAB1 signalosome Homo sapiens R-HSA-180292	0.018	2.1	8.5	PDGFRA SRC ERBB4 PDGFB PTEN PDGFA FGF1 FOXO3 FGFR4 FGF2 FGFR2 FGF10	0.073
248	Scavenging by Class B Receptors Homo sapiens R-HSA-3000471	0.021	13	51	APOA1 CD36	0.086
249	Initial triggering of complement Homo sapiens R-HSA-166663	0.021	2.7	10	FCN1 C1QB FCN2 C1QA FCN3 MBL2 C1QC	0.086
250	FGFR2c ligand binding and activation Homo sapiens R-HSA-190375	0.022	5.9	23	FGF1 FGF2 FGFR2	0.09
251	RHO GTPases Activate NADPH Oxidases Homo sapiens R-HSA-5668599	0.022	5.9	23	NOXO1 RAC1 NOX1	0.09
252	HSF1-dependent transactivation Homo sapiens R-HSA-3371571	0.023	3.4	13	DNAJB6 HSPA1L MRPL18 SERPINH1 COL4A6	0.09
253	Negative regulation of FGFR2 signaling Homo sapiens R-HSA-5654727	0.023	3.4	13	SRC FGF1 FGF2 FGFR2 FGF10	0.09
254	TNFs bind their physiological receptors Homo sapiens R-HSA-5669034	0.027	4	14	EDA TNFRSF11B TNFRSF1B TNFRSF1A	0.1
255	Sema4D induced cell migration and growth-cone collapse Homo sapiens R-HSA-416572	0.027	4	14	ROCK1 MYH11 RAC1 RHOA	0.1
256	Apoptosis Homo sapiens R-HSA-109581	0.027	1.9	6.8	ROCK1 PRKCD CFLAR PTK2 PSMA6 CDH1 BCL2 GAS2 BAX CTNNB1 VIM TP53 TLR4 TLR3	0.1
257	Cell-cell junction organization Homo sapiens R-HSA-421270	0.027	2.6	9.3	CDH2 JUP CDH1 CDH13 CTNNB1 ANG F11R	0.11
258	Receptor-ligand binding initiates the second proteolytic cleavage of Notch receptor Homo sapiens R-HSA-156988	0.027	5.4	19	NOTCH1 JAG1 ADAM10	0.11
259	FGFR4 ligand binding and activation Homo sapiens R-HSA-190322	0.027	5.4	19	FGF1 FGFR4 FGF2	0.11
260	SEMA3A-Plexin repulsion signaling by inhibiting Integrin adhesion Homo sapiens R-HSA-399955	0.027	5.4	19	NRP1 RRAS RAC1	0.11
261	Activation of Rac Homo sapiens R-HSA-428540	0.027	5.4	19	GPC1 SLIT2 RAC1	0.11
262	Programmed Cell Death Homo sapiens R-HSA-5357801	0.031	1.8	6.4	ROCK1 PRKCD CFLAR PTK2 PSMA6 CDH1 BCL2 GAS2 BAX CTNNB1 VIM TP53 TLR4 TLR3	0.12
263	Telomere Extension By Telomerase Homo sapiens R-HSA-171319	0.031	9.9	34	RUVBL2 RUVBL1	0.12
264	Pyrimidine biosynthesis Homo sapiens R-HSA-500753	0.031	9.9	34	CAD TYMS	0.12
265	TCF dependent signaling in response to WNT Homo sapiens R-HSA-201681	0.032	1.7	6	FZD4 WNT3A CAV1 WNT5A WNT8A LRP5 PSMA6 SFRP1 SFRP2 CSNK2B RUVBL1 CTNNB1 SOX9 SOST WNT3 WNT4	0.12
266	Constitutive Signaling by NOTCH1 HD Domain Mutants Homo sapiens R-HSA-2691232	0.033	4.9	17	NOTCH1 JAG1 ADAM10	0.12
267	Signaling by NOTCH1 HD Domain Mutants in Cancer Homo sapiens R-HSA-2691230	0.033	4.9	17	NOTCH1 JAG1 ADAM10	0.12
268	FGFR1 ligand binding and activation Homo sapiens R-HSA-190242	0.033	4.9	17	FGF1 FGF2 FGF10	0.12
269	SHC-mediated cascade:FGFR2 Homo sapiens R-HSA-5654699	0.035	3.6	12	FGF1 FGF2 FGFR2 FGF10	0.13
270	Gamma carboxylation, hypusine formation and arylsulfatase activation Homo sapiens R-HSA-163841	0.038	2.9	9.5	F7 F9 FURIN F2 GAS6	0.14
271	VEGFR2 mediated vascular permeability Homo sapiens R-HSA-5218920	0.039	3.4	11	JUP CAV1 CTNNB1 RAC1	0.14
272	Sema3A PAK dependent Axon repulsion Homo sapiens R-HSA-399954	0.039	4.6	15	NRP1 CFL1 RAC1	0.14
273	RHO GTPases activate CIT Homo sapiens R-HSA-5625900	0.039	4.6	15	MYH11 RAC1 RHOA	0.14
274	Metabolism of folate and pterines Homo sapiens R-HSA-196757	0.039	4.6	15	SHMT2 MTHFD2 ALDH1L2	0.14
275	O-linked glycosylation of mucins Homo sapiens R-HSA-913709	0.039	2.3	7.6	MUC2 MUC17 MUC5B MUC3A MUC4 MUC5AC MUC6	0.14
276	RHO GTPase Effectors Homo sapiens R-HSA-195258	0.041	1.6	5.1	ITGB1 AHCTF1 ROCK1 SRC SRF NOXO1 KLK2 IQGAP1 PTK2 RHOA ACTG1 CDH1 ABL1 CTNNB1 MYH11 RAC1 NOX1 CLASP1 CLASP2	0.15
277	Phosphate bond hydrolysis by NUDT proteins Homo sapiens R-HSA-2393930	0.042	7.9	25	NUDT9 NUDT1	0.15
278	Synthesis of Ketone Bodies Homo sapiens R-HSA-77111	0.042	7.9	25	HMGCL ACAT1	0.15
279	Antigen processing-Cross presentation Homo sapiens R-HSA-1236975	0.044	2.1	6.7	PSMA6 ITGB5 CTSL ITGAV CTSV CD36 CALR CTSS	0.16
280	Ligand-dependent caspase activation Homo sapiens R-HSA-140534	0.046	4.2	13	CFLAR TLR4 TLR3	0.16
281	RHO GTPases Activate ROCKs Homo sapiens R-HSA-5627117	0.046	4.2	13	ROCK1 MYH11 RHOA	0.16
282	Metabolism of water-soluble vitamins and cofactors Homo sapiens R-HSA-196849	0.047	2	6.1	PRSS1 BTD MTHFD2 SHMT2 HLCS CTRB2 CTRB1 ALDH1L2 COASY	0.17
283	Adaptive Immune System Homo sapiens R-HSA-1280218	0.051	1.3	3.9	ITGB1 ITGB5 SRC ITGB2 PDGFB PTEN ICAM2 PDGFA ICAM3 ICAM4 PTPRJ ICAM5 CTSV FGF1 FOXO3 ITGAL CD3E FGF2 CTSS ICAM1 CDH1 CTSL ERBB4 CTSK CTSH ITGAV ITGB7 MADCAM1 CD36 CTSF RAC1 SKP2 CD34 CTSD CTSC CTSB PDGFRA VCAM1 ITGA4 PSMA6 CD4 SIGLEC1 CALR FGFR4 CD200 FGFR2 FGF10	0.18
284	Chemokine receptors bind chemokines Homo sapiens R-HSA-380108	0.052	2.4	7	CCL25 CXCL12 CCL21 CCL28 CX3CL1 PF4	0.18
285	Activation of SMO Homo sapiens R-HSA-5635838	0.053	3.9	12	SHH IHH CDON	0.18
286	TP53 Regulates Transcription of Genes Involved in G2 Cell Cycle Arrest Homo sapiens R-HSA-6804114	0.053	3.9	12	CDK1 BAX TP53	0.18
287	Pre-NOTCH Processing in Golgi Homo sapiens R-HSA-1912420	0.053	3.9	12	B4GALT1 NOTCH1 FURIN	0.18
288	Neurotransmitter Clearance In The Synaptic Cleft Homo sapiens R-HSA-112311	0.054	6.6	19	ACHE ALDH2	0.18
289	Formyl peptide receptors bind formyl peptides and many other ligands Homo sapiens R-HSA-444473	0.054	6.6	19	APP ANXA1	0.18
290	VEGF ligand-receptor interactions Homo sapiens R-HSA-194313	0.054	6.6	19	KDR VEGFA	0.18
291	VEGF binds to VEGFR leading to receptor dimerization Homo sapiens R-HSA-195399	0.054	6.6	19	KDR VEGFA	0.18
292	Axonal growth inhibition (RHOA activation) Homo sapiens R-HSA-193634	0.054	6.6	19	LINGO1 RHOA	0.18
293	Synthesis of epoxy (EET) and dihydroxyeicosatrienoic acids (DHET) Homo sapiens R-HSA-2142670	0.054	6.6	19	EPHX2 CYP1B1	0.18
294	Negative regulation of FGFR4 signaling Homo sapiens R-HSA-5654733	0.06	2.9	8.2	SRC FGF1 FGFR4 FGF2	0.21
295	Signaling by FGFR2 IIIa TM Homo sapiens R-HSA-8851708	0.061	3.7	10	FGF1 FGF2 FGFR2	0.21
296	MHC class II antigen presentation Homo sapiens R-HSA-2132295	0.061	1.9	5.3	CTSL CTSK CTSH CTSV CTSF CTSD CTSS CTSC CTSB	0.21
297	Negative regulation of FGFR1 signaling Homo sapiens R-HSA-5654726	0.067	2.8	7.6	SRC FGF1 FGF2 FGF10	0.22
298	TGF-beta receptor signaling activates SMADs Homo sapiens R-HSA-2173789	0.067	2.8	7.6	TGFB1 SMAD3 FURIN TGFBR1	0.22
299	p75NTR regulates axonogenesis Homo sapiens R-HSA-193697	0.067	5.6	15	LINGO1 RHOA	0.23
300	PCP/CE pathway Homo sapiens R-HSA-4086400	0.073	1.9	5	PSMA6 WNT11 WNT5B FZD4 WNT5A RAC1 RHOA WNT4	0.24
301	FGFR2 mutant receptor activation Homo sapiens R-HSA-1839126	0.073	2.7	7.1	FGF1 FGF2 FGFR2 FGF10	0.24
302	Defensins Homo sapiens R-HSA-1461973	0.075	2.4	6.1	CD4 DEFB118 DEFA1 PRSS2 TLR2	0.25
303	NOTCH2 Activation and Transmission of Signal to the Nucleus Homo sapiens R-HSA-2979096	0.078	3.3	8.4	JAG1 MDK ADAM10	0.26
304	SHC-mediated cascade:FGFR1 Homo sapiens R-HSA-5654688	0.078	3.3	8.4	FGF1 FGF2 FGF10	0.26
305	RIP-mediated NFkB activation via ZBP1 Homo sapiens R-HSA-1810476	0.078	3.3	8.4	APP TLR3 NFKB2	0.26
306	Regulation of FZD by ubiquitination Homo sapiens R-HSA-4641263	0.078	3.3	8.4	FZD4 WNT3A LRP5	0.26
307	Cobalamin (Cbl, vitamin B12) transport and metabolism Homo sapiens R-HSA-196741	0.078	3.3	8.4	PRSS1 CTRB2 CTRB1	0.26
308	Signaling by WNT in cancer Homo sapiens R-HSA-4791275	0.08	2.6	6.7	FZD4 WNT3A LRP5 CTNNB1	0.26
309	ATF6-alpha activates chaperone genes Homo sapiens R-HSA-381183	0.081	4.9	12	CALR HSP90B1	0.26
310	MAPK3 (ERK1) activation Homo sapiens R-HSA-110056	0.081	4.9	12	IL6 CDK1	0.26
311	TRIF-mediated programmed cell death Homo sapiens R-HSA-2562578	0.081	4.9	12	TLR4 TLR3	0.26
312	Regulation of signaling by NODAL Homo sapiens R-HSA-1433617	0.081	4.9	12	LEFTY2 CER1	0.26
313	Urea cycle Homo sapiens R-HSA-70635	0.081	4.9	12	CPS1 OTC	0.26
314	Signaling by FGFR in disease Homo sapiens R-HSA-1226099	0.083	2.1	5.2	BCR FGF1 FGFR4 FGF2 FGFR2 FGF10	0.27
315	Phospholipase C-mediated cascade; FGFR2 Homo sapiens R-HSA-5654221	0.086	2.2	5.5	PRKCD FGF1 FGF2 FGFR2 FGF10	0.28
316	Role of LAT2/NTAL/LAB on calcium mobilization Homo sapiens R-HSA-2730905	0.094	1.6	3.8	PDGFRA SRC ERBB4 PDGFB PTEN PDGFA FGF1 FOXO3 FGFR4 FGF2 FGFR2 FGF10	0.29
317	RHO GTPases Activate WASPs and WAVEs Homo sapiens R-HSA-5663213	0.094	2.5	5.8	ABL1 RAC1 PTK2 ACTG1	0.29
318	Uptake and function of anthrax toxins Homo sapiens R-HSA-5210891	0.096	4.4	10	FURIN ANTXR1	0.29
319	Signaling by NOTCH3 Homo sapiens R-HSA-1980148	0.096	4.4	10	JAG1 ADAM10	0.29
320	Signaling by NOTCH4 Homo sapiens R-HSA-1980150	0.096	4.4	10	JAG1 ADAM10	0.29
321	FGFR1c ligand binding and activation Homo sapiens R-HSA-190373	0.096	4.4	10	FGF1 FGF2	0.29
322	Signaling by activated point mutants of FGFR1 Homo sapiens R-HSA-1839122	0.096	4.4	10	FGF1 FGF2	0.29
323	DSCAM interactions Homo sapiens R-HSA-376172	0.096	4.4	10	RAC1 NTN1	0.29
324	Recruitment of NuMA to mitotic centrosomes Homo sapiens R-HSA-380320	0.096	4.4	10	NUMA1 CDK1	0.29
325	Condensation of Prometaphase Chromosomes Homo sapiens R-HSA-2514853	0.096	4.4	10	CSNK2B CDK1	0.29
326	RHO GTPases activate KTN1 Homo sapiens R-HSA-5625970	0.096	4.4	10	RAC1 RHOA	0.29
327	Apoptotic cleavage of cell adhesion proteins Homo sapiens R-HSA-351906	0.096	4.4	10	CDH1 CTNNB1	0.29
328	Biotin transport and metabolism Homo sapiens R-HSA-196780	0.096	4.4	10	BTD HLCS	0.29
329	SHC-mediated cascade:FGFR4 Homo sapiens R-HSA-5654719	0.097	3	6.9	FGF1 FGFR4 FGF2	0.3

## Sheet: S3-OS (cBioportal-PCAT)
																																					OS estimation for 3 randomly generated gene lists
Overall survival of NB patients upregulating 964 ECM-related genes based on TARGET data deposited to cBioPortal using Z=2 setting, and OS and the corresponding patient number at risk obtained from the OS analysis module in PCAT with auto-calculate or mean settings and finally the Cox histology status correlations with OS																																					List 1	OS		List 2	OS		List 3	OS	NA= either no data or no data under the gene name entered, variations in gene names were not investigated
																																					NDUFAF2	1.71e-11		SLC3A2	1.02e-08		ARNTL2-AS1	5.19e-10
2 and 3 method selection					Gene expression and OS (cutoff= auto-calculate)								Gene expression and OS (cutoff= mean)													Histology and OS											UBA52	2.62e-10		CNIH4	2.096e-06		LINC01492	6.091e-06
		3-method selection																																			COX7C	2.27e-09		LMO1	4.33e-05		MITD1	2.507e-05		List 1	List 2	List 3	Original list of 954 ECM-related genes
	2-method selection																																				ERBB4	2.56e-08		TIPRL	5.127e-05		TRMT112	3.868e-05		68/964	51/964	67/964	52/964
Gene list	OS (log-rank test) Z=2	OS (PCAT)- autocalculate	OS (PCAT)- mean		OS (PCAT)	cutoff= auto-calculate							OS (PCAT)	cutoff= mean												OS (PCAT)	cutoff= auto-calculate										DYNLL1	1.9e-07		NDUFA2	6.824e-05		SLC43A3	0.0001004	Precentage	7.05394	5.29046	6.95021	5.39419
AMBN	0.0006262	0.00874	0.01113		AMBN								AMBN												AMBN												CDCA4	1.245e-06		FGF14-IT1	0.0001134		CRTC1	0.000148
COLQ	0.0156	0.0468	0.43																																		CAMTA1	2.74e-06		BLOC1S5	0.0001226		COMTD1	0.000176
ELFN1	0.0468	0.0234	0.26																																		RPS9	9.862e-06		CUEDC2	0.0006627		KRTAP10-5	0.0003723
HAS3	0.0134	0.0049	0.81																																		CTU1	4.412e-05		SPRR2G	0.0006827		MTHFD1	0.0007511
HSPE1	0.0002372	5e-05	0.00159																																		CHRNA9	4.898e-05		EXOSC5	0.0008432		DHRSX	0.0009047
LMAN1	0.0426	0.0448	0.22																																		SF3B6	5.693e-05		TRIM52-AS1	0.001148		EVI5L	0.0009135
LRP5	0.0136	0.00659	0.094																																		DCAF13	0.0001176		OTUD7A	0.00116		HELB	0.00258
MUC6	2.096e-05	1e-05	0.00051																																		MC1R	0.0003404		NTHL1	0.003086		NUBP2	0.003086
RAMP2	0.0177	0.00464	0.02307																																		SH3GL3	0.0003866		KRTAP4-6	0.003691		ADAT3	0.00309
RUVBL2	0.0214	<0.000001	0.00031																																		RCHY1	0.0004358		PPAN	0.004087		ATP4A	0.007121
SSBP1	0.00818	2e-05	0.00043																																		RPL27	0.0005177		USP41	0.005781		ERP29	0.00738
UMOD	0.0309	0.00034	0.056																																		MTA2	0.0005414		ZNF90	0.007118		SNRNP25	0.008277
																																					RAB2B	0.000556		ATXN2	0.008516		PDAP1	0.008719
	Reduced OS																																				FBXL15	0.001189		DRD4	0.009398		HIF3A	0.0114
	Increased OS																																				RPS28	0.001195		SUCLA2-AS1	0.01		SNORA31	0.0115
																																					WDR26	0.00132		ACBD5	0.0105		RMDN2-AS1	0.0115
																																					CDCA5	0.002153		CHIA	0.0115		COX16	0.0139
																																					SHISA8	0.002375		ZSCAN10	0.0125		DLEU7	0.0142
																																					DICER1-AS1	0.002999		ARMS2	0.013		RPS6KA2	0.0151
																																					TEX22	0.003417		GNG4	0.016		GNG4	0.016
																																					C9orf40	0.00428		HTR5A-AS1	0.0163		YDJC	0.0166
					COLQ	OS (PCAT)	cutoff= auto-calculate																														ICOS	0.005015		SET	0.0184		SFPQ	0.0173
																																					NDUFA7	0.0055		NLN	0.0202		APOBEC3A	0.0198
																																					MED4	0.00607		SDHAF2	0.027		RPL38	0.0209
																																					ZNF90	0.007118		IRGM	0.0275		C6orf120	0.0219
																																					ICMT	0.008342		TSPEAR	0.0297		MAF1	0.0222
																																					RGS20	0.008506		CXCL11	0.0298		MRPS12	0.024
																																					UBB	0.009346		BAALC-AS2	0.03		BPNT1	0.0248
																																					YLPM1	0.009762		PLSCR1	0.0301		TAF10	0.0254
																																					TAF6L	0.0102		ADAR	0.0304		RNASEH2B	0.0277
																																					C1orf56	0.011		CCKBR	0.0309		LAMA3	0.0278
																																					LDLRAD3	0.0111		MRPS27	0.0312		CD3D	0.0287
																																					SNORD113-3	0.0115		SDR16C5	0.0318		ZNF585B	0.0295
																																					ASTN2-AS1	0.0115		SOAT1	0.0332		IFNG	0.0298
																																					LINC01498	0.0115		TMEM59L	0.0337		PPM1G	0.0301
																																					DDI1	0.0115		NOTCH4	0.0381		RPS16	0.0308
																																					ZNF28	0.0142		TLX3	0.0381		SLC6A19	0.0309
																																					ZNF48	0.0143		C12orf60	0.0383		VPS37A	0.033
																																					CLP1	0.0149		KDM1B	0.0385		GML	0.0345
																																					PTPN23	0.0159		IMPDH2	0.0385		UQCR10	0.0355
																																					GBA2	0.0164		FAM111A	0.0392		ELP4	0.0362
																																					GTF2A1L	0.0174		NOC3L	0.0395		ZNF804A	0.0363
																																					GMPS	0.0231		TEFM	0.0441		C4orf48	0.0393
					ELFN1	OS (PCAT)	cutoff= auto-calculate																														ZNF276	0.0254		LINC00919	0.0452		GGN	0.0393
																																					RNASE8	0.0278		INSM1	0.0475		EEF1B2	0.0398
																																					PODXL2	0.0291		FBXL19	1.19E0-4		MRPS11	0.0401
																																					DANCR	0.0298		MICU3	0.0489		PCCB	0.0421
																																					NUP205	0.0309		HNRNPDL	0.0507		NEU2	0.0452
																																					HSD17B11	0.0318		FAM20B	0.0511		DOHH	0.0467
																																					TCL1B	0.033		EPX	0.0543		ZNF596	0.048
																																					FBXO6	0.0391		BRCA2	0.0543		EIF4B	0.0513
																																					LIM2	0.0392		KCNN1	0.06		MAP3K14	0.799
																																					AKT1S1	0.0402		SNHG16	0.0608		AADACL2-AS1	0.905
																																					ZMYND19	0.0404		CDH20	0.0613		INTS6-AS1	2770
																																					DVL3	0.042		KRTAP19-8	0.065		TRIM41	2.721E-.06
																																					CMTM4	0.0425		EXO5	0.0679		EIF3A	4.664-E03
																																					AQP6	0.0455		ACR	0.0688		PTPN2	0.0194
																																					SPDYE5	0.0455		AJUBA	0.072		DNASE2B	0.027
																																					TMEM129	0.047		TUBB1	0.0722		TSPEAR	0.0297
																																					NIPSNAP3A	0.047		CABIN1	0.0728		GOLGB1	0.0422
																																					OTUD7A	1.16E0-3		SLX4	0.0767		RALGAPA2	0.0424
																																					ANKRD34B	2.34E0-11		EFEMP2	0.0792		IL22RA2	0.0482
																																					DDA1	3.563-05		MYSM1	0.0808		ZNF324B	0.0524
																																					SCUBE2	0.0513		DSTYK	0.0809		DEDD	0.0539
																																					NMBR	0.0536		ISX	0.0817		SETDB2	0.0555
					HAS3	OS (PCAT)	cutoff= auto-calculate																														MND1	0.0541		AQR	0.0824		PCDHA7	0.0599
																																					BRCA2	0.0543		ULBP1	0.0824		KRTAP10-1	0.0602
																																					SLC27A3	0.057		DEFB132	0.0831		ZNF141	0.0608
																																					PWWP2B	0.0582		ANKRD36B	0.0839		EPN1	0.0608
																																					C1orf131	0.0582		SYF2	0.0843		SWI5	0.0651
																																					ZNF451	0.0587		NR1H3	0.0845		SYNE1-AS1	0.0655
																																					CCNT2	0.0601		ZNF83	0.0847		RGS9BP	0.0672
																																					FAM201A	0.0602		CDC73	0.0878		LINC01499	0.0711
																																					BMP1	0.061		PDE8B	0.0883		NEK9	0.0719
																																					LINC01311	0.0637		KCNS3	0.089		RRS1	0.0722
																																					HRH3	0.0638		CKMT2	0.0947		AKIRIN2	0.0722
																																					MANSC4	0.064		FBN3	0.0953		FKBP2	0.0725
																																					TBRG4	0.0655		USP17L26	0.097		TAS2R50	0.0728
																																					KIAA2026	0.0678		NDST4	0.0977		ZNF556	0.0733
																																					PDCD2L	0.0678		ATP2A2	0.0987		HBP1	0.074
																																					LINC01491	0.0704		EVA1B	0.1		BAIAP2L2	0.0741
																																					LEMD1-AS1	0.0711		MERTK	0.102		NDUFAB1	0.0778
																																					LINC01502	0.0711		DDIT4L	0.105		CCDC146	0.0801
																																					KIF20A	0.0719		DCTD	0.105		MMP3	0.082
																																					CYP2J2	0.073		LIMS1	0.106		MSANTD3-TMEFF1	0.0832
																																					CHD1L	0.0754		POLM	0.108		CAPN3	0.0833
																																					GPR156	0.0757		LINC01265	0.109		TTLL7	0.0846
					HSPE1	OS (PCAT)	cutoff= auto-calculate						HSPE1	OS (PCAT)	cutoff= mean										HSPE1	OS (PCAT)	cutoff= auto-calculate										TTK	0.0758		GFM1	0.11		ZNF83	0.0847
																																					LINC01002	0.0778		HNRNPA2B1	0.11		UACA	0.0854
																																					TBC1D1	0.0778		TXNRD2	0.112		ZNF541	0.0891
																																					CLYBL-AS2	0.0786		FN3KRP	0.113		SNX27	0.0905
																																					SLC25A15	0.0831		MRPS6	0.113		CYP4F22	0.0905
																																					MSANTD3-TMEFF1	0.0832		LINC01085	0.114		SEC11A	0.0908
																																					RFPL4A	0.084		SLAIN1	0.115		RIC8A	0.0914
																																					ZNF534	0.085		AQP8	0.116		NRIP3	0.0931
																																					ALG5	0.085		TIPIN	0.116		TUBD1	0.0951
																																					SLC2A3	0.0875		EXOC1	0.117		MEG8	0.0969
																																					NOD1	0.088		SC5D	0.117		SLC37A3	0.0972
																																					SOX1	0.088		DUSP8	0.117		DCP2	0.0995
																																					TTC16	0.0932		TCP11L1	0.124		EVA1B	0.1
																																					SLC18B1	0.094		SLC35F2	0.126		ADAMTS6	0.105
																																					SLC37A3	0.0972		KRTAP19-5	0.126		PRRT1	0.106
																																					PLOD1	0.1		OLAH	0.129		CPT1C	0.106
																																					CASKIN2	0.102		ME2	0.129		ZNF462	0.107
																																					ULK2	0.106		COMMD7	0.129		SH3GL1	0.107
																																					HSD17B3	0.106		SYCE1	0.13		DGKB	0.107
																																					NOTCH3	0.106		PCDH1	0.132		NXPH4	0.107
																																					SRSF9	0.107		ZNF69	0.132		NOS3	0.108
																																					PTGDR	0.108		LINC01315	0.133		ADAM21	0.109
					LMAN1	OS (PCAT)	cutoff= auto-calculate																														POLM	0.108		ALDH2	0.134		PGA3	0.11
																																					IGF2-AS	0.108		LINC00426	0.134		AFTPH	0.11
																																					ACTL7B	0.109		TREML2	0.137		CLSTN2-AS1	0.111
																																					PPP1R21	0.112		CTXN1	0.138		IRF9	0.112
																																					SNORA48	0.112		RAPGEF2	0.139		PUS1	0.113
																																					B3GALT1	0.112		ABCF3	0.139		PPIE	0.114
																																					IFT52	0.115		TSPAN15	0.14		DDT	0.115
																																					CCDC63	0.115		ANKRD27	0.14		HEY1	0.116
																																					METAP1	0.116		TDRD3	0.141		TSPAN33	0.118
																																					EIF4G3	0.118		PRELID3B	0.141		ZSCAN20	0.12
																																					ACTA2-AS1	0.119		ARIH2OS	0.141		E2F3	0.12
																																					ELOVL2-AS1	0.119		TMEM79	0.141		GLCE	0.126
																																					DNAAF3	0.12		ACSL3	0.141		DHPS	0.126
																																					CATSPER2	0.121		ZDHHC8	0.144		MYC	0.126
																																					MCCC2	0.122		PPP1R11	0.146		CYP2U1	0.127
																																					VCAN	0.125		FAM225B	0.146		BCL2L2-PABPN1	0.131
																																					MAPK3	0.127		NEUROD4	0.147		SOX12	0.132
																																					ZNF69	0.132		NPAS1	0.147		PCDH1	0.132
																																					IGFL4	0.133		HNF4A-AS1	0.148		ZNF891	0.132
																																					EXOSC9	0.136		SLCO1B7	0.148		KLHDC2	0.134
																																					GABRR2	0.137		IL22RA1	0.148		BRD4	0.136
																																					SGO2	0.138		CYP2B6	0.148		ABCF3	0.139
					LRP5	OS (PCAT)	cutoff= auto-calculate																		LRP5	OS (PCAT)	cutoff= auto-calculate										SNORA2C	0.142		EHHADH	0.148		ATP6V1B2	0.14
																																					MS4A4A	0.148		RTN2	0.148		ACSL3	0.141
																																					LINC00261	0.148		LPGAT1	0.149		TMEM256-PLSCR3	0.142
																																					CYP4A11	0.148		THSD1	0.149		LST1	0.147
																																					CYP2B6	0.148		UGT1A6	0.15		ONECUT1	0.148
																																					GC	0.148		ITGA5	0.151		SLC23A1	0.148
																																					PON3	0.148		GDPD5	0.154		RTN2	0.148
																																					AGMAT	0.148		ACRV1	0.154		CYP2A6	0.148
																																					HDAC3	0.149		PGBD3	0.155		GRM7	0.149
																																					FHOD1	0.151		CCDC185	0.158		PHIP	0.15
																																					ASPM	0.151		DUSP23	0.158		ADCYAP1R1	0.15
																																					GJC1	0.151		SLC30A10	0.16		MLEC	0.151
																																					KCNE2	0.153		CLDN3	0.16		ADH1C	0.151
																																					COL2A1	0.154		ZNF836	0.162		SPACA4	0.154
																																					RFPL1	0.154		NUP93	0.164		REM1	0.154
																																					FMN1	0.155		BSPRY	0.167		ACER3	0.155
																																					HPCAL1	0.157		GPD1	0.167		ADGRA1-AS1	0.156
																																					MSANTD2	0.157		LINC00670	0.168		HERC3	0.157
																																					C9orf85	0.157		KANSL2	0.17		BLNK	0.157
																																					SFI1	0.159		NUTM2A	0.171		LUZP1	0.157
																																					PBOV1	0.161		IPO7	0.173		CCL1	0.16
																																					STRA6	0.166		SYNE4	0.174		UBE2Q1	0.164
					MUC6	OS (PCAT)	cutoff= auto-calculate						MUC6	OS (PCAT)	cutoff= mean										MUC6	OS (PCAT)	cutoff= auto-calculate										ABCG2	0.167		SP9	0.178		GTPBP10	0.167
																																					RBPJ	0.167		CATSPER3	0.18		LINC00654	0.169
																																					FMO3	0.167		UBE2R2	0.18		LINC00853	0.17
																																					FABP4	0.167		CHAT	0.182		GPALPP1	0.172
																																					GRIN3B	0.168		GALNS	0.183		LINC00330	0.172
																																					LINC00654	0.169		PFKFB4	0.184		ATG101	0.173
																																					RPL36	0.169		SLC36A4	0.185		CNTFR	0.173
																																					CLN6	0.17		ZNF71	0.186		ALKBH5	0.174
																																					ATF3	0.17		GDNF-AS1	0.187		PSMD6	0.175
																																					PIK3C2B	0.172		RPL26	0.188		CBWD1	0.177
																																					CDK10	0.172		TMEM89	0.19		PROK1	0.177
																																					GPR87	0.172		LHFPL4	0.19		CATSPER3	0.18
																																					NCKAP5	0.174		NPAT	0.191		LINC00605	0.18
																																					SLC17A9	0.174		ALG10	0.191		PRG3	0.181
																																					TRA2A	0.175		CSN3	0.192		NID2	0.181
																																					ARHGAP17	0.176		SLC26A3	0.192		BRMS1L	0.183
																																					GOPC	0.176		EPOR	0.194		RASSF1	0.184
																																					HRAS	0.177		IQCC	0.194		RN7SK	0.185
																																					HS1BP3	0.18		SERTAD3	0.195		NIP7	0.185
																																					PRR5-ARHGAP8	0.184		LCN8	0.196		AKR1B15	0.185
																																					ZNF329	0.184		FAM83D	0.196		UBE2L3	0.186
																																					PIK3R4	0.186		TRMT10C	0.199		ZNF648	0.187
					RAMP2	OS (PCAT)	cutoff= auto-calculate						RAMP2	OS (PCAT)	cutoff= mean										RAMP2	OS (PCAT)	cutoff= auto-calculate										UBE2L3	0.186		LMNTD1	0.199		THTPA	0.189
																																					ARFGAP1	0.187		ALDOC	0.201		SH3BP1	0.191
																																					TARBP2	0.187		SNORA71D	0.203		SKOR2	0.191
																																					PTPN21	0.189		KCNK18	0.204		MTRNR2L8	0.194
																																					SPATA2L	0.194		ASB17	0.204		SMIM21	0.196
																																					TDP1	0.198		PGLYRP4	0.204		RAB19	0.196
																																					BICC1	0.198		RTN4RL2	0.204		KLK8	0.197
																																					NECAB1	0.2		GPR150	0.204		AEN	0.197
																																					LINC00994	0.203		SMCP	0.204		ATP9B	0.198
																																					SPRR4	0.204		OR13C8	0.204		TRIM37	0.201
																																					OR13C8	0.204		OR10G7	0.204		ST3GAL6-AS1	0.203
																																					SFTA2	0.205		KRT6B	0.206		OR4K14	0.204
																																					FGD5	0.206		NMRAL1	0.211		KPRP	0.204
																																					BPGM	0.207		FABP9	0.213		PNKP	0.205
																																					MRC2	0.208		NEMP2	0.214		DNAJB8	0.206
																																					LINC00702	0.21		NFU1	0.214		VSTM5	0.207
																																					ASCL1	0.21		CRYL1	0.215		SLC19A2	0.207
																																					MRPS35	0.212		STAMBPL1	0.217		SHOX	0.207
																																					LINC00339	0.213		LAMB4	0.217		BPGM	0.207
																																					RHBDD2	0.215		CDCA7	0.217		ZAR1L	0.208
																																					RPN2	0.218		FOXH1	0.217		LGI3	0.209
																																					OLFML1	0.219		POU2F3	0.218		NDUFAF5	0.21
					RUVBL2	OS (PCAT)	cutoff= auto-calculate						RUVBL2	OS (PCAT)	cutoff= mean										RUVBL2	OS (PCAT)	cutoff= auto-calculate										MRFAP1L1	0.219		CD69	0.219		ASCL1	0.21
																																					DCAF4L2	0.221		SZRD1	0.219		DHX36	0.216
																																					IFRD1	0.222		KLK10	0.219		THNSL1	0.222
																																					RIIAD1	0.222		CYLC2	0.221		ZNF443	0.225
																																					KRT15	0.223		BAG5	0.225		S100A6	0.228
																																					SHQ1	0.227		SOX4	0.23		GNG2	0.23
																																					NECTIN2	0.229		CCNG1	0.23		EBLN2	0.232
																																					PLCXD3	0.229		MARK2	0.231		FAM151B	0.233
																																					LRRC63	0.23		TMCC1	0.231		GTF2H3	0.234
																																					GTF2H3	0.234		ARL11	0.236		NANOS1	0.234
																																					CLNK	0.234		DDX50	0.236		MAP1LC3A	0.235
																																					LRRC55	0.235		COG5	0.237		DDX50	0.236
																																					DIXDC1	0.235		BRMS1	0.238		FBXO46	0.241
																																					POLR3G	0.235		ELAVL2	0.239		CPSF1	0.242
																																					CCND2	0.236		TPM2	0.242		ISG20L2	0.249
																																					KALRN	0.241		C1QL2	0.243		TRIM11	0.25
																																					PCNX2	0.241		HNF4G	0.243		TPX2	0.252
																																					SF3B1	0.243		RBM18	0.243		AZGP1	0.253
																																					IFI6	0.244		PHC3	0.244		FTCD	0.253
																																					RSPH6A	0.247		PDE11A	0.245		PLG	0.253
																																					FBXL18	0.249		GLDN	0.245		LOX	0.253
																																					MAMDC2	0.249		FBXL18	0.249		CP	0.253
					SSBP1	OS (PCAT)	cutoff= auto-calculate						SSBP1	OS (PCAT)	cutoff= mean										SSBP1	OS (PCAT)	cutoff= auto-calculate										PNLDC1	0.251		EIF5A2	0.25		CTLA4	0.253
																																					TNFAIP8	0.252		PNLDC1	0.251		HULC	0.253
																																					HGD	0.253		NAT8	0.253		HGD	0.253
																																					SLC17A3	0.253		SLC17A3	0.253		MSI1	0.254
																																					FAM99A	0.253		APOA4	0.253		BTG2	0.257
																																					AFM	0.253		SLC10A1	0.253		CNTLN	0.261
																																					APOA2	0.253		APOC3	0.253		HHLA3	0.261
																																					TTC38	0.253		F5	0.253		IGDCC4	0.264
																																					FAM228A	0.256		HPD	0.253		TTC12	0.266
																																					PRRX1	0.256		C4BPA	0.253		WTAP	0.268
																																					BTG2	0.257		AZGP1	0.253		C1QL4	0.268
																																					CDRT15	0.26		SERPINA11	0.253		ARAP2	0.271
																																					GFAP	0.261		SLC1A2	0.254		UST	0.273
																																					ZBED5-AS1	0.262		BNIPL	0.254		CLEC4E	0.275
																																					PCDHGB4	0.265		PCDHGB7	0.259		PCBD1	0.277
																																					FBXL12	0.265		CCSER1	0.26		FAM197Y6	0.278
																																					VARS2	0.266		SNAI1	0.261		FLII	0.282
																																					BIRC6	0.267		RAB2A	0.264		ZDBF2	0.284
																																					KCNB1	0.268		NECAP1	0.265		TM9SF1	0.286
																																					SMIM13	0.269		DPRX	0.266		LCN12	0.286
																																					ELOVL3	0.269		NMB	0.268		FRMD8	0.289
																																					MCM3AP	0.271		ZNF749	0.269		CASQ1	0.292
					UMOD	OS (PCAT)	cutoff= auto-calculate																		UMOD	OS (PCAT)	cutoff= auto-calculate										ARID3C	0.271		PNPLA2	0.273		TLR9	0.292
																																					UBE2D3	0.273		TNIK	0.277		IQCF5-AS1	0.294
																																					HLA-C	0.274		LINC01410	0.277		C1orf185	0.294
																																					TMEM91	0.275		SATB2-AS1	0.278		IGFL3	0.294
																																					ZNF696	0.281		BCAM	0.278		PEG3	0.295
																																					FBXO21	0.282		DNAJA1	0.281		PHOSPHO1	0.296
																																					SEC14L4	0.282		ZDBF2	0.284		MMP2	0.296
																																					LTBP4	0.283		KCNK5	0.285		BGLAP	0.296
																																					KCNK5	0.285		ZNF730	0.285		HEPACAM2	0.296
																																					CSTF1	0.287		CMPK1	0.291		SLFNL1	0.298
																																					AGPAT4	0.289		DLGAP3	0.291		CAMSAP2	0.301
																																					TNNI1	0.292		ASCC2	0.293		STRIP1	0.301
																																					MYBPC2	0.292		SPTBN5	0.294		CENPB	0.302
																																					FGF6	0.292		PDE1A	0.294		DUOXA2	0.302
																																					MROH5	0.294		SKAP1	0.294		CC2D2B	0.303
																																					NCR3LG1	0.294		EIF4E3	0.297		PLA2G2A	0.305
																																					NACA2	0.294		ARL6IP4	0.299		TRAPPC3L	0.307
																																					OR10S1	0.294		IGSF9	0.3		TP53TG1	0.308
																																					EBF2	0.295		ID3	0.301		SMCO1	0.309
																																					SHB	0.296		STRIP1	0.301		SPATA5	0.311
																																					IBSP	0.296		ANHX	0.301		KDSR	0.312
																																					STPG2	0.299		UBE2D4	0.302		ANGPTL2	0.314
																																					NR2F2-AS1	0.301		C8orf76	0.306		FZD4	0.324
																																					DUOXA2	0.302		SNAI3	0.309		HENMT1	0.326
																																					SULT1A2	0.302		ACSBG1	0.309		PTK2	0.326
																																					KCNH1	0.304		KLC2	0.311		RNVU1-15	0.327
																																					WIPF3	0.306		INHBB	0.317		MSR1	0.329
																																					CTAGE1	0.307		RNVU1-15	0.327		ANXA6	0.331
																																					CPAMD8	0.311		DNAJC30	0.327		LEMD2	0.334
																																					ANO1	0.312		BEND4	0.328		KCNAB2	0.335
																																					KRT81	0.313		GPR157	0.331		OBP2B	0.335
																																					ZFYVE9	0.316		C1orf50	0.331		PILRB	0.336
																																					KCNK1	0.319		FAM13A	0.331		TOR2A	0.336
																																					PBX4	0.319		AKR7A3	0.333		SMYD4	0.337
																																					VEGFC	0.321		HIF1A-AS1	0.335		NDN	0.338
																																					SCGN	0.322		MYO3A	0.335		RFTN2	0.339
																																					DNAH5	0.323		TDRD9	0.337		CCDC9	0.34
																																					ELK4	0.324		ZNF341-AS1	0.338		MS4A1	0.34
																																					HELZ2	0.328		GBP2	0.339		TMEM145	0.341
																																					ARSG	0.328		ZFP3	0.34		PKP2	0.341
																																					NAPG	0.331		SERPINA9	0.341		SERPINA9	0.341
																																					PGGT1B	0.331		PCDH9-AS3	0.342		SNORD14E	0.342
																																					SRGAP3	0.331		C16orf78	0.342		LINC00317	0.342
																																					ATXN7L3	0.334		TTTY1B	0.342		C21orf91-OT1	0.342
																																					CES2	0.337		LCTL	0.342		SLC4A1	0.342
																																					PTTG1	0.338		PLCH1-AS1	0.342		MAPRE3	0.344
																																					DOCK10	0.341		LINC00305	0.342		BMP3	0.346
																																					SNORD14E	0.342		ZNF148	0.345		CMIP	0.351
																																					TTTY1	0.342		SEC24D	0.347		BARX1	0.353
																																					KRT1	0.342		PAFAH2	0.347		OMD	0.354
																																					HINT1	0.342		PRORY	0.348		ZNF671	0.356
																																					DUSP16	0.347		TMCC3	0.349		SUMO3	0.356
																																					PAPPA	0.347		LINC00525	0.35		TPP1	0.356
																																					ESF1	0.348		C1QTNF5	0.35		LCLAT1	0.356
																																					ATG2A	0.35		ZSWIM8	0.352		UQCC1	0.358
																																					TUBB2B	0.352		ARSJ	0.352		LINC01089	0.359
																																					PRCD	0.353		FSCN2	0.352		LONP1	0.361
																																					PPP4R2	0.354		PXDN	0.353		YPEL4	0.363
																																					PSME3	0.355		ST3GAL2	0.354		MSS51	0.365
																																					LCAT	0.355		RNU6-8	0.356		TLR10	0.366
																																					RNU6-2	0.355		MATN2	0.357		S100B	0.366
																																					PARP4	0.357		GCNT1	0.357		CD1D	0.366
																																					GPR25	0.359		LINC01089	0.359		FAM83E	0.367
																																					LRRC45	0.359		PRR20C	0.36		THEM4	0.367
																																					COX11	0.361		NEDD4	0.361		ACTR3C	0.368
																																					MRTO4	0.363		LINC01115	0.362		CNTNAP1	0.371
																																					ZNF354B	0.363		ZNF304	0.362		APH1B	0.374
																																					INPPL1	0.363		PPM1N	0.367		SLC9A3R1	0.376
																																					PRKACB	0.366		BUB1B	0.368		CYB5B	0.385
																																					S100B	0.366		PLCD1	0.369		CALML5	0.386
																																					MYCN	0.367		LINC00689	0.371		LINC00343	0.386
																																					LINC01341	0.367		PNPT1	0.372		CLIP4	0.386
																																					CIT	0.37		NCKIPSD	0.373		RNASEH2C	0.386
																																					LUZP2	0.372		ZNF878	0.374		NRAV	0.387
																																					OR1K1	0.374		CCND3	0.374		LINC00298	0.387
																																					WNT7A	0.376		AKTIP	0.375		DISP3	0.389
																																					KRTAP12-1	0.376		TAS2R3	0.378		PRKAG2	0.39
																																					OLR1	0.378		AASDHPPT	0.378		FAM120B	0.392
																																					CD52	0.379		ST6GAL2	0.379		PCAT4	0.393
																																					ATP8B1	0.38		FAM72D	0.381		CHGB	0.393
																																					TFAP2A-AS1	0.38		ACO1	0.382		SH3GLB2	0.395
																																					LUC7L	0.38		FAM193A	0.383		GPR45	0.395
																																					RMDN1	0.38		LINC01095	0.386		FBXO43	0.397
																																					TXNDC9	0.381		LINC00443	0.386		NAV2-AS2	0.398
																																					PPP1R7	0.382		RBM4B	0.386		ZNF286B	0.398
																																					NUMBL	0.382		RNASEH2C	0.386		SBSPON	0.4
																																					CCDC13-AS1	0.383		IZUMO2	0.386		RASGRP3	0.402
																																					ARCN1	0.384		MFRP	0.386		NT5DC4	0.404
																																					MBD3L3	0.386		ALDH9A1	0.386		SPATA1	0.404
																																					MRO	0.386		ATP6V1A	0.389		ZNF682	0.405
																																					AIP	0.386		GAD2	0.393		OCEL1	0.407
																																					PGP	0.386		CD55	0.395		CRYZL1	0.408
																																					EPPIN	0.386		CHPT1	0.399		ITGB1BP1	0.412
																																					PDGFRL	0.387		ZNF761	0.399		LINC00954	0.415
																																					RRAGD	0.388		SERTM1	0.399		DNAJC3	0.415
																																					RAB11FIP4	0.392		SORL1	0.399		C11orf52	0.416
																																					ZBTB8OS	0.394		ERICH2	0.402		LMO7DN	0.421
																																					CATSPER1	0.397		PARD6G	0.403		STK25	0.422
																																					DTYMK	0.399		CRB1	0.405		ZNF324	0.422
																																					GAS7	0.4		HBB	0.407		THAP3	0.425
																																					CCR3	0.405		SMC2	0.407		KLF3	0.431
																																					RAB6C-AS1	0.411		CEACAM4	0.41		TP73	0.432
																																					OR2AK2	0.411		FAM71E2	0.411		TARS2	0.433
																																					ATP1B3	0.412		LY6E	0.413		ADAT1	0.434
																																					ZFYVE27	0.414		INSIG1	0.413		KDM6B	0.441
																																					VPS28	0.415		BRF1	0.414		MYO18A	0.443
																																					CFAP53	0.416		YWHAH	0.414		SNORA22	0.444
																																					MSH2	0.417		CCND2-AS1	0.415		PSTK	0.445
																																					UCK1	0.418		HK1	0.417		ITGB2-AS1	0.448
																																					RBAK	0.419		CD9	0.422		AP4B1-AS1	0.448
																																					XRN1	0.423		ZNF324	0.422		TP63	0.45
																																					SMAGP	0.424		PSEN2	0.424		GOLGA6B	0.45
																																					ARPC1B	0.425		KDELR3	0.424		CCDC43	0.452
																																					PPRC1	0.426		LMO7-AS1	0.424		SERPINB10	0.454
																																					PF4V1	0.427		INMT	0.425		GABRG2	0.455
																																					DAG1	0.428		MXD4	0.427		GCSAML-AS1	0.456
																																					HECTD4	0.43		VAMP8	0.427		ADM5	0.458
																																					TLR6	0.436		LINC00888	0.431		RD3L	0.459
																																					LATS2	0.439		MEF2C-AS1	0.432		LINC00184	0.459
																																					MROH2B	0.44		CSPG5	0.434		OR4N5	0.459
																																					FLVCR1	0.441		MEST	0.434		AGER	0.46
																																					PRKAR1B	0.443		FAM83F	0.436		USP7	0.46
																																					MFNG	0.443		OGFR-AS1	0.44		KCNN3	0.461
																																					ST8SIA4	0.443		ST13	0.441		CPEB3	0.463
																																					COL9A3	0.444		PCDH15	0.441		TRAK1	0.465
																																					IL21-AS1	0.449		SRRD	0.444		S100A14	0.465
																																					LMNTD2	0.449		ITGAV	0.447		DGKD	0.466
																																					DMRTC2	0.449		SHE	0.448		SENP2	0.467
																																					LINC01252	0.449		CANT1	0.452		CCDC113	0.468
																																					CSMD3	0.449		AQP1	0.455		FAHD2B	0.47
																																					YWHAQ	0.452		RHOG	0.455		TMPRSS9	0.471
																																					KCTD5	0.457		GCSAML-AS1	0.456		COL4A3	0.473
																																					ZNF33B	0.458		PARVA	0.456		ADGRL3-AS1	0.473
																																					OR4K1	0.459		BZW1	0.457		MPP7	0.474
																																					KLK4	0.459		CELSR3	0.457		WWC2	0.475
																																					AGER	0.46		LARS2-AS1	0.457		STRN4	0.476
																																					PPP4R4	0.462		TMEM132B	0.462		TACSTD2	0.476
																																					JCHAIN	0.463		MORF4L1	0.463		CCL24	0.477
																																					HEPN1	0.464		FAR2	0.464		TNPO3	0.477
																																					FGF19	0.464		NUDCD3	0.465		TCN2	0.478
																																					B3GNT3	0.465		MSH6	0.466		CTSC	0.48
																																					PANX2	0.467		OSER1	0.468		MLF1	0.484
																																					SEC24C	0.468		NDUFB6	0.468		LINC00645	0.485
																																					SLC35F1	0.468		HMG20A	0.469		CASC2	0.487
																																					HMG20A	0.469		DNAJB7	0.47		PSMD14	0.49
																																					SLC28A2	0.47		TMPRSS9	0.471		B4GALT1	0.491
																																					SNTB2	0.471		MPP7	0.474		USP9Y	0.493
																																					RASGEF1C	0.472		MEIS2	0.475		MBP	0.494
																																					PEA15	0.473		SKA3	0.477		RXRB	0.497
																																					GAL3ST2	0.473		AK1	0.478		TRIM49D1	0.497
																																					PCF11	0.474		GIMAP7	0.479		KCNJ10	0.497
																																					FAM167B	0.474		TAOK3	0.479		C3orf20	0.498
																																					KCNRG	0.475		SIGLEC8	0.479		ETFBKMT	0.499
																																					SETMAR	0.478		CNOT6L	0.48		EMP1	0.5
																																					ERGIC1	0.478		ADCK1	0.485		LINC00944	0.502
																																					FMO4	0.479		BCAN	0.485		FANCA	0.502
																																					ARHGAP19	0.48		PDZD2	0.486		ECE1	0.502
																																					STEAP4	0.483		DLEC1	0.491		ZDHHC12	0.504
																																					A2M-AS1	0.485		ANKRD36C	0.495		SFMBT2	0.505
																																					WNT16	0.485		SYCP3	0.497		NUP210L	0.505
																																					MYOCD	0.485		HCP5	0.497		TGFBR3L	0.505
																																					ZNF146	0.491		SLC22A18	0.497		COQ5	0.507
																																					CFTR	0.495		CNTN6	0.498		COG3	0.511
																																					C10orf67	0.499		RPS6KA1	0.499		ZBED1	0.512
																																					CA1	0.499		TM4SF19	0.5		ZBTB7A	0.513
																																					ETFBKMT	0.499		UNC93B1	0.501		SYNPR	0.515
																																					CCDC96	0.501		SMU1	0.502		DEDD2	0.515
																																					GPR155	0.501		RRM2	0.502		TIMM44	0.517
																																					APH1A	0.501		NCBP2	0.503		PMS1	0.519
																																					VANGL1	0.503		PRPF6	0.506		ZNF250	0.52
																																					EIF3D	0.506		AKAP3	0.506		XCL2	0.521
																																					LYRM1	0.507		PARP9	0.506		TAS2R20	0.523
																																					TNFSF15	0.51		GPR149	0.509		NMD3	0.524
																																					BEST1	0.517		NGLY1	0.51		LLPH	0.525
																																					SYT2	0.519		LIN7A	0.51		AVEN	0.526
																																					APOL6	0.519		VANGL2	0.513		ALG1	0.528
																																					C4orf36	0.52		GALC	0.513		FLG-AS1	0.529
																																					PRSS1	0.52		HTATIP2	0.518		HSP90B1	0.532
																																					FAM217B	0.522		DYNC2H1	0.519		SYT6	0.532
																																					TRIM2	0.523		ZNF385C	0.521		DDX56	0.535
																																					PABPN1	0.524		NASP	0.522		MORC3	0.536
																																					TXNL4B	0.525		RARB	0.524		ZER1	0.536
																																					NMI	0.525		LLPH	0.525		KCNJ14	0.541
																																					RNF222	0.528		CPO	0.528		SCAMP1	0.541
																																					TMEM68	0.529		SMIM14	0.533		HSBP1	0.541
																																					ARL4C	0.53		ZNF529	0.534		GPR132	0.542
																																					SYTL2	0.531		PAPLN	0.537		TGM2	0.548
																																					RRBP1	0.532		MS4A6A	0.539		RTF1	0.554
																																					UPK2	0.533		EHD2	0.539		REG1B	0.556
																																					ST3GAL6	0.533		ZNF536	0.54		NPTXR	0.557
																																					PIGH	0.535		FAM43A	0.542		NCEH1	0.557
																																					APC2	0.543		REEP2	0.542		SRSF4	0.559
																																					RNF123	0.546		LGALS4	0.544		NODAL	0.56
																																					STK17A	0.547		CHST1	0.545		TM4SF4	0.56
																																					PFKFB2	0.551		GALM	0.546		ILDR2	0.561
																																					ZNF746	0.554		MPHOSPH9	0.547		LRRC8C	0.565
																																					LINC00442	0.558		LINC01356	0.547		SENP1	0.567
																																					RC3H1	0.558		RPS27A	0.549		CAMK1G	0.567
																																					ADAM20	0.559		TCP1	0.551		ACAP1	0.569
																																					UBA6	0.562		URGCP	0.551		HMGXB3	0.57
																																					PITRM1-AS1	0.564		SAE1	0.554		PSD2	0.572
																																					FBXO39	0.564		ASIC5	0.554		WDFY3-AS2	0.574
																																					LINC01048	0.564		DEFB123	0.556		KCNMA1-AS1	0.575
																																					CGREF1	0.565		C16orf72	0.558		AGBL3	0.576
																																					TNFSF11	0.566		SRSF4	0.559		GOLGA8R	0.578
																																					HDAC7	0.567		SPSB2	0.561		SLC22A1	0.578
																																					CDKN2AIP	0.567		PTGS1	0.562		VIPR2	0.58
																																					LCK	0.569		LINC00924	0.564		HSPA13	0.58
																																					NPHP3	0.57		PITRM1-AS1	0.564		NT5C1A	0.585
																																					TOX3	0.57		EBNA1BP2	0.568		SMC3	0.591
																																					CC2D1B	0.575		RALB	0.568		OC90	0.592
																																					KCNK12	0.575		PSD2	0.572		FSCB	0.593
																																					ZNF718	0.579		ZCWPW2	0.573		IER3	0.595
																																					PRCC	0.58		TRIM8	0.573		VAMP2	0.595
																																					MATR3	0.581		CACNA1I	0.576		NAT8L	0.596
																																					HTR2A	0.581		THUMPD3	0.577		PRPF3	0.597
																																					LINC00174	0.581		SLCO2A1	0.578		COL17A1	0.598
																																					ZW10	0.584		ZNF469	0.579		FER	0.599
																																					MARVELD1	0.584		C12orf54	0.581		CDAN1	0.6
																																					LTK	0.585		CCR6	0.581		SLC25A24	0.601
																																					SRGN	0.586		PAPOLB	0.583		CRNKL1	0.601
																																					SLC19A3	0.586		GARNL3	0.583		CCDC191	0.604
																																					STAT5B	0.588		CTRC	0.585		TSN	0.605
																																					ACTBL2	0.59		ZMAT4	0.586		LINC01250	0.606
																																					CACNG6	0.59		FBXL14	0.586		AMY2A	0.608
																																					CYBA	0.591		RUBCN	0.588		SRR	0.611
																																					APOBEC3G	0.591		PTPRU	0.588		RIBC2	0.613
																																					WWP2	0.595		TRIM54	0.589		COQ4	0.614
																																					LURAP1	0.595		SIRT7	0.59		ADCY6	0.616
																																					LRRC49	0.596		DNAJC5	0.591		SH3RF1	0.62
																																					SLC25A24	0.601		SYBU	0.591		TFAP2A	0.624
																																					CRNKL1	0.601		SMC3	0.591		KIF22	0.625
																																					LILRB1	0.601		CLDN19	0.593		TMEM9B	0.626
																																					SNORA3A	0.603		CD84	0.594		UFC1	0.627
																																					SOX9	0.603		NINJ1	0.595		FMN2	0.627
																																					MAP1LC3B2	0.605		KANK2	0.601		MTHFD2L	0.629
																																					MC5R	0.605		REPIN1	0.602		DONSON	0.629
																																					KCTD14	0.606		SNORD8	0.603		MLNR	0.631
																																					DDIT3	0.607		FGF8	0.606		ADNP	0.631
																																					ARHGEF25	0.607		CYP27B1	0.607		CD46	0.633
																																					ASNS	0.607		SUCO	0.608		DRAXIN	0.633
																																					CYP4B1	0.607		KIF21B	0.608		POLD3	0.633
																																					KIF21B	0.608		VAMP3	0.612		TMEM88	0.634
																																					SPINK7	0.608		VPS35	0.614		RAC1	0.635
																																					ARFGEF3	0.61		COX8C	0.614		CLGN	0.635
																																					PITPNA	0.611		ADCY6	0.616		VPS13A-AS1	0.643
																																					SMYD2	0.615		NPIPB15	0.618		LINC00974	0.643
																																					TFAP2A	0.624		CHD6	0.618		LINC01182	0.643
																																					ELMOD1	0.627		ADPRH	0.619		SELL	0.645
																																					CCDC30	0.633		TMED3	0.622		PCDHAC1	0.651
																																					MREG	0.634		ANAPC5	0.622		MLX	0.652
																																					PLCH2	0.635		GMNC	0.628		INA	0.653
																																					API5	0.637		SPATA13	0.629		EMX2	0.654
																																					AKT1	0.638		ARHGEF40	0.631		RARA	0.654
																																					STK11	0.64		GTF2E1	0.632		LARP4B	0.659
																																					POLR3F	0.64		WFDC1	0.635		CABLES2	0.663
																																					ALX1	0.645		MAD2L1	0.638		ATP2C1	0.664
																																					TEAD4	0.649		RBCK1	0.639		FBXL19-AS1	0.665
																																					TACO1	0.651		NLRP2	0.64		LINC01508	0.666
																																					DCTN6	0.651		PPIL3	0.641		SAA1	0.669
																																					CLLU1	0.652		TPCN1	0.645		VAMP4	0.669
																																					MAPK11	0.653		GOLGA8H	0.645		RCN2	0.669
																																					ACOT7	0.654		QRICH1	0.646		PDSS2	0.672
																																					EMX2	0.654		MRPL23-AS1	0.646		C14orf28	0.673
																																					MRPL4	0.655		NRBF2	0.649		PRR33	0.674
																																					OMA1	0.655		SNAPC1	0.65		DCAF6	0.676
																																					ENAH	0.657		IKZF2	0.654		GABRB2	0.679
																																					CTAGE8	0.661		MIER1	0.654		KANK1	0.679
																																					POGZ	0.662		RAB28	0.658		TFAP2D	0.685
																																					ZSWIM6	0.663		TRAF6	0.66		URB2	0.687
																																					PRB3	0.667		AP4E1	0.661		TRIM24	0.688
																																					PAK2	0.669		SUCLG2	0.662		WDR24	0.689
																																					SLC38A9	0.67		ASB10	0.662		TMEM223	0.692
																																					TPST1	0.67		GLRA3	0.663		KCTD9	0.693
																																					CNBD2	0.671		UBR2	0.663		SERPINB9	0.696
																																					OR11H12	0.672		ASPA	0.665		C2orf42	0.697
																																					PLRG1	0.672		DNAJC4	0.665		TMEM117	0.7
																																					IL11	0.673		PCDH9	0.666		OTOP2	0.701
																																					KCNK15	0.674		CLEC12A	0.667		CD59	0.703
																																					BRPF1	0.677		RCN2	0.669		PDCD4	0.707
																																					CLEC3A	0.678		NOG	0.669		KRTAP16-1	0.707
																																					GABRB2	0.679		TC2N	0.675		LINC01273	0.708
																																					TMEM98	0.679		STAM	0.678		NAF1	0.708
																																					E2F8	0.682		WFDC13	0.678		ITGAX	0.71
																																					INSL5	0.682		FOXK2	0.679		CCDC174	0.71
																																					IL17REL	0.682		NUDT7	0.681		PPIF	0.714
																																					NOL7	0.684		CR2	0.682		JMJD7	0.716
																																					CYP2S1	0.684		PPP1R14C	0.686		FBXO47	0.721
																																					SHTN1	0.685		IFI27	0.686		GTF3C2-AS1	0.724
																																					EEPD1	0.686		URB2	0.687		BCL2L2	0.726
																																					PPARD	0.686		TRIM24	0.688		SAYSD1	0.73
																																					IFI27	0.686		RAD9A	0.689		HERPUD2	0.731
																																					LINC00886	0.688		PIP	0.69		ZSCAN21	0.737
																																					DGCR2	0.689		STIM2	0.691		EXOC8	0.737
																																					ANKRD37	0.69		SIGLEC10	0.694		PTMS	0.738
																																					DCN	0.692		TST	0.694		GREM1	0.741
																																					ZNF727	0.692		PMEL	0.695		RPP38	0.742
																																					TCEANC2	0.693		LINC00560	0.695		ATG16L2	0.742
																																					CCDC134	0.694		DNAL1	0.697		RAB31	0.745
																																					TDRKH	0.695		C6orf163	0.701		ZNF101	0.748
																																					BCL7B	0.701		TMEM43	0.702		SMIM2-AS1	0.75
																																					TBL2	0.701		SLC7A5	0.703		CHRM4	0.753
																																					SMARCB1	0.703		GIMAP5	0.703		CABYR	0.756
																																					SPAG8	0.704		TRAF3IP2-AS1	0.706		BEND7	0.756
																																					RAB3IP	0.705		TMEM39A	0.71		LIAS	0.759
																																					UCHL3	0.71		RNF20	0.711		HAPLN4	0.759
																																					CLEC2B	0.713		PCOLCE	0.713		DPH1	0.759
																																					GCAT	0.714		UBTF	0.718		PLEKHO2	0.76
																																					SPAG1	0.717		FOXI1	0.719		HOXA1	0.76
																																					CPLX2	0.718		SLC25A6	0.72		FAM66B	0.761
																																					TKFC	0.719		KCNK10	0.721		LNX1	0.761
																																					SERHL2	0.719		ZNF180	0.723		CDK19	0.761
																																					USP5	0.72		PRAME	0.724		SPICE1	0.765
																																					GLE1	0.721		MACROD2	0.724		GPR148	0.766
																																					CCDC175	0.724		IL3RA	0.725		ZC3H12D	0.768
																																					HES7	0.725		FAM110A	0.726		NLE1	0.77
																																					ZNF574	0.726		WDR11	0.728		SIT1	0.77
																																					WDR11	0.728		BBS9	0.729		PLEKHJ1	0.772
																																					ATP12A	0.73		TIGD2	0.73		GSTP1	0.772
																																					CD48	0.73		HERPUD2	0.731		KCNMB1	0.775
																																					ZNF518A	0.731		MCHR2-AS1	0.732		OVCH1	0.78
																																					TMEM239	0.733		MEGF8	0.732		OR4N4	0.78
																																					ZSCAN21	0.737		SGPL1	0.733		PMM1	0.782
																																					LINC01436	0.737		TMEM18	0.734		FAS	0.782
																																					ALG14	0.738		DEXI	0.736		IQCD	0.786
																																					IFNGR2	0.74		DDX4	0.736		CCDC192	0.788
																																					SPAG4	0.74		EXOC8	0.737		LINC01474	0.789
																																					TTC17	0.742		LMBRD2	0.739		TGIF2	0.79
																																					APRT	0.743		RHEBL1	0.741		USP12	0.791
																																					KDR	0.743		SMURF2	0.743		OR2A14	0.792
																																					FAM83B	0.744		PAQR3	0.744		E2F1	0.794
																																					MCMDC2	0.746		FOXD4L5	0.748		NDFIP2	0.794
																																					PUS10	0.746		DDX28	0.748		CD1E	0.794
																																					SELE	0.749		CHRNA1	0.75		OR8B8	0.798
																																					PC	0.75		CCM2L	0.756		MYOF	0.799
																																					MBOAT1	0.751		RAD9B	0.756		LIG3	0.8
																																					BCL6	0.751		ACTL10	0.758		VAX1	0.8
																																					UNC80	0.753		TRIB3	0.76		GATA4	0.8
																																					RNA5S2	0.754		PLXDC2	0.761		RD3	0.801
																																					ZNF18	0.754		KRT27	0.762		CUBN	0.802
																																					WDR6	0.76		PITPNM2	0.763		SFMBT1	0.804
																																					ADGRF5	0.76		SLC39A14	0.764		ZFP69	0.805
																																					PATL2	0.762		ACOT2	0.768		KIFC3	0.806
																																					KCND2	0.762		DCLK3	0.771		CSRNP2	0.806
																																					C1orf216	0.763		DTWD2	0.773		THG1L	0.806
																																					SKIDA1	0.769		ZNF684	0.774		SSH3	0.81
																																					RBM38	0.769		TMEM109	0.775		CXCL2	0.811
																																					GCG	0.77		C6orf201	0.776		CSF1	0.815
																																					ZNF497	0.771		FOSL1	0.777		SOS2	0.817
																																					HSCB	0.772		JMJD6	0.779		ISX	0.817
																																					SYCP2L	0.773		SPG7	0.781		PDC	0.818
																																					TRPM7	0.773		DTL	0.782		NPIPB4	0.818
																																					AP3B1	0.776		COX7A2L	0.784		CACNA1G	0.818
																																					ERP27	0.779		TAS2R1	0.788		PHACTR1	0.819
																																					HRCT1	0.78		ASTL	0.792		TTC34	0.819
																																					ADRA1A	0.78		OR2A14	0.792		CRX	0.821
																																					NRXN1	0.781		ANKAR	0.794		AMT	0.821
																																					LINC00643	0.782		R3HCC1L	0.794		VPS51	0.822
																																					SCARA5	0.782		DNAH7	0.795		ESCO2	0.823
																																					NCOR2	0.783		PKDREJ	0.796		MEGF6	0.823
																																					TLE6	0.784		RNF167	0.798		TEAD3	0.823
																																					MKI67	0.784		ZNF517	0.802		GATB	0.827
																																					LINC01505	0.785		GOLGA7B	0.803		MYL10	0.828
																																					ZNF750	0.787		P3H1	0.804		TMEM150C	0.829
																																					GCN1	0.792		MRPL23	0.804		SERF2	0.831
																																					PLEKHM1	0.793		TMEM41B	0.809		PLAT	0.832
																																					ANKRD13A	0.793		TRIM66	0.809		CBLN3	0.832
																																					TMEM37	0.794		SHC4	0.809		EIF4A3	0.832
																																					EML4	0.794		NRTN	0.809		GPR63	0.833
																																					CD1A	0.794		TM6SF2	0.81		TMEM115	0.834
																																					CLU	0.794		TNFRSF14	0.811		CMAS	0.835
																																					LIMD1	0.797		IL6	0.811		OSR1	0.837
																																					LINC00639	0.798		TUSC1	0.811		CACTIN-AS1	0.838
																																					MAP3K14	0.799		CHPF2	0.815		NDUFA4L2	0.838
																																					NAAA	0.799		LINC01168	0.818		CEP170B	0.841
																																					SRGAP2C	0.801		GAP43	0.821		CWH43	0.841
																																					EIF3E	0.801		CDCA8	0.821		OPA1	0.841
																																					LINC01522	0.802		SRFBP1	0.822		BBS12	0.842
																																					SPCS3	0.802		SOX18	0.823		PRAMEF8	0.842
																																					GRINA	0.803		VIP	0.827		PRAMEF7	0.842
																																					ZNF273	0.803		NPY2R	0.83		SNORA53	0.843
																																					FZD10-AS1	0.807		C15orf39	0.831		DLX6-AS1	0.843
																																					PRDM11	0.807		PDCD10	0.834		LINC00398	0.844
																																					CRK	0.808		ADAP2	0.835		TACC3	0.846
																																					KDM5D	0.809		HYI	0.835		GSDMA	0.847
																																					TUBB4A	0.809		CC2D2A	0.841		NFIX	0.848
																																					TRIM66	0.809		TXLNA	0.842		PRIMPOL	0.851
																																					AIF1	0.81		NEDD1	0.846		TMEM184B	0.851
																																					CHAC1	0.812		NFIX	0.848		LRRC43	0.851
																																					PRDX1	0.812		CCDC59	0.849		NOP16	0.852
																																					PTF1A	0.812		HVCN1	0.851		LIF	0.854
																																					SLC29A1	0.814		ADGRG7	0.86		SYTL1	0.855
																																					ZNF506	0.818		KRT13	0.862		PTPRQ	0.855
																																					EPHA1-AS1	0.818		ZC3H7A	0.864		MARK1	0.856
																																					NUP210	0.822		IL5RA	0.865		MED28	0.858
																																					DLST	0.827		ANKRD16	0.865		CTRC	0.859
																																					SERF2	0.831		CCDC85B	0.867		LGALS3BP	0.86
																																					SLC50A1	0.833		SOX13	0.869		ZDHHC18	0.86
																																					SZT2-AS1	0.833		TSPEAR-AS1	0.872		CD177	0.862
																																					POLR3GL	0.834		ARHGAP31	0.875		USP12-AS1	0.862
																																					KRT17	0.836		ZFP36L2	0.876		RAD52	0.863
																																					CCDC80	0.837		METRNL	0.876		EPS8L3	0.863
																																					IRX3	0.837		ERVW-1	0.877		LINC01426	0.865
																																					CPOX	0.838		TSPYL6	0.884		PKN1	0.866
																																					SLC2A6	0.84		DUSP15	0.888		WDR47	0.87
																																					PGBD1	0.84		MTRF1L	0.89		USP28	0.87
																																					TXLNA	0.842		JMJD4	0.901		IL10RB	0.872
																																					CHD4	0.843		WIZ	0.903		MAPK8	0.873
																																					RCOR2	0.847		MAB21L1	0.904		RASGRP2	0.873
																																					TOR1AIP1	0.848		UGT1A7	0.905		LINC01119	0.876
																																					SOWAHC	0.85		ZNF181	0.906		GRM5-AS1	0.879
																																					MRGPRG	0.851		SEMA6A-AS1	0.906		SPRY1	0.88
																																					LIF	0.854		RABEP1	0.91		GPD2	0.88
																																					CXCL16	0.854		KCTD4	0.913		NDEL1	0.882
																																					MTRNR2L9	0.86		ARHGAP10	0.913		CYB5R1	0.888
																																					OBSL1	0.86		SSTR5-AS1	0.915		MRPL55	0.891
																																					RFX4	0.862		POTEE	0.917		ADGRE1	0.891
																																					MTG1	0.863		TBC1D16	0.918		ZNF649	0.892
																																					IL5RA	0.865		NDUFV1	0.929		KIR2DS4	0.892
																																					CCNK	0.865		ATG7	0.929		PATE2	0.896
																																					TTLL12	0.866		NARS2	0.93		LINC01205	0.897
																																					GNAO1	0.869		SLCO1A2	0.93		PRMT8	0.897
																																					METTL12	0.87		EHD4	0.93		GAST	0.901
																																					LINC01590	0.872		SDCBP	0.932		FAM177B	0.903
																																					LPIN3	0.872		RPL3	0.932		AFF4	0.903
																																					RASGRP2	0.873		SHANK2-AS1	0.934		CUTA	0.903
																																					ORC2	0.876		ST7-OT4	0.936		ZNF627	0.906
																																					MISP	0.879		GIMAP8	0.938		ATRNL1	0.908
																																					MACROD2-AS1	0.879		PVR	0.938		EIF3H	0.909
																																					NDEL1	0.882		NYNRIN	0.938		TEX29	0.912
																																					TMC6	0.883		ABHD2	0.938		RPA2	0.912
																																					C11orf42	0.883		EMC3	0.942		M1AP	0.916
																																					MTIF2	0.886		LINC00400	0.942		RNF6	0.916
																																					LAG3	0.888		OLFM3	0.947		NNAT	0.917
																																					MIDN	0.89		ZBED3-AS1	0.951		NPIPA5	0.917
																																					TICRR	0.89		AMD1	0.951		DLEU7-AS1	0.918
																																					ZFAND4	0.894		IFT140	0.953		S100A11	0.919
																																					HES2	0.894		SCGB1C1	0.956		KLHL29	0.924
																																					MRPL10	0.895		BPTF	0.957		FBRS	0.925
																																					LSP1	0.895		DGKG	0.965		YIPF4	0.925
																																					MPZL1	0.896		ZFYVE28	0.965		AKR1B10	0.926
																																					SMAD9	0.897		ARHGEF3	0.967		ZNF484	0.927
																																					LINC00320	0.897		DNAJB2	0.967		CDH6	0.928
																																					SNAI3-AS1	0.899		ABCC1	0.967		FAM102B	0.928
																																					ADCK4	0.903		LGALS7	0.968		MAN2B1	0.928
																																					CYP27A1	0.903		MKX	0.969		TMEM171	0.929
																																					TAS2R38	0.903		CCDC78	0.969		TOMM6	0.929
																																					RUNX1T1	0.904		TP53BP2	0.969		GDE1	0.931
																																					SNX25	0.904		MCM7	0.972		DNER	0.932
																																					FADS1	0.905		MGLL	0.972		ANKIB1	0.932
																																					LINC00311	0.905		DNAH11	0.975		EDC3	0.934
																																					IGFN1	0.91		PDE4C	0.975		C18orf32	0.934
																																					GNAI1	0.912		LRRC75B	0.976		KRT71	0.937
																																					IL4	0.915		BARX2	0.978		ZSWIM2	0.94
																																					DDX60L	0.915		PSME4	0.983		ZNF133	0.941
																																					SNORA12	0.916		SPATA3-AS1	0.984		GAB2	0.942
																																					CTAGE9	0.917		ATXN10	0.986		IGFBP6	0.943
																																					PIAS1	0.92		TSPAN5	0.989		ABCB6	0.944
																																					MT1M	0.92		PACS2	0.99		NPSR1	0.944
																																					TRNP1	0.922		SH3BP5	0.992		STAT1	0.945
																																					ZNF366	0.922		PPIP5K1	0.993		ERF	0.95
																																					TUFT1	0.923		SEMA5B	0.995		RABGAP1L	0.953
																																					NEAT1	0.923		GPT	0.995		EPHX1	0.954
																																					FLOT1	0.929		DPY19L1	0.998		CLASRP	0.955
																																					PIK3CD-AS1	0.931		IGHJ1	NA		ZNF544	0.957
																																					CD79B	0.936		DEFB104B	NA		FAM186B	0.959
																																					BTBD6	0.938		LINC01476	NA		SPN	0.959
																																					INTS7	0.938		C11orf44	NA		TMPO	0.959
																																					LLGL1	0.94		TRQ-TTG5-1	NA		NPIPB7	0.965
																																					OR2C1	0.94		AD5	NA		MUL1	0.965
																																					TIMM22	0.947		PSORS8	NA		MYLK4	0.968
																																					TMEM71	0.949		SMCR6	NA		HES3	0.971
																																					CCDC33	0.951		TBC1D3D	NA		METTL16	0.971
																																					ENDOD1	0.952		MRGPRX3	NA		LATS1	0.971
																																					RAMP1	0.955		C11orf73	NA		SZT2	0.975
																																					FAM186B	0.959		C9orf114	NA		SLC43A1	0.975
																																					MFGE8	0.959		EVR3	NA		IVL	0.976
																																					PGLS	0.96		SNORD116-19	NA		MTMR4	0.976
																																					ZC3H11A	0.961		LINC01040	NA		ITPR2	0.979
																																					LINC01301	0.967		IGHV3-38	NA		MORC2-AS1	0.981
																																					TGDS	0.968		WDR60	NA		F2RL3	0.982
																																					RLBP1	0.968		TBC1D3	NA		SIPA1L2	0.987
																																					MKX	0.969		FAM96A	NA		PLCB2	0.987
																																					LRP11	0.974		RBM12B-AS1	NA		ZFAND1	0.989
																																					SLC30A5	0.974		LINC00551	NA		PXMP2	0.993
																																					ISY1-RAB43	0.975		SNORA86	NA		PPIP5K1	0.993
																																					MSMO1	0.975		KDM4A-AS1	NA		TMIE	1
																																					SLC43A1	0.975		SNORD6	NA		FAM71F1	NA
																																					KIF25	0.976		IGKV3OR2-268	NA		SNORD51	NA
																																					CCR4	0.977		ERVW-24	NA		C1orf64	NA
																																					PIPOX	0.977		SNORA107	NA		ASB16-AS1	NA
																																					OR4F21	0.978		IZUMO3	NA		FAM231A	NA
																																					CHMP7	0.979		C1orf228	NA		SCZD8	NA
																																					LINC01013	0.981		FAM197Y10	NA		SEN6	NA
																																					HLF	0.984		FXYD1	NA		C16orf70	NA
																																					ZFAND1	0.989		RNA28S1	NA		SNORA63	NA
																																					EPS8L2	0.998		TTTY3B	NA		TRR-CCT6-1	NA
																																					DDO	1		LINC00392	NA		CCDC94	NA
																																					MYOM3	292		LRRC9	NA		LIX1L	NA
																																					SPATA42	671		TMPRSS2	NA		LINC01586	NA
																																					CDKL1	739		SNAR-A1	NA		OPA8	NA
																																					PIGZ	0..0163		SPRR2B	NA		TRS-AGA1-1	NA
																																					SNORD115-33	NA		LINC01444	NA		ENO1-IT1	NA
																																					C15orf65	NA		DUXB	NA		FGF12-AS1	NA
																																					KCNAB1-AS1	NA		C14orf79	NA		ZNF56	NA
																																					ZBED6CL	NA		DYX2	NA		IGLV3-25	NA
																																					LYZL2	NA		FAM27C	NA		ZMYND10-AS1	NA
																																					GIP	NA		SCZD8	NA		CALR3	NA
																																					AIS2	NA		TRV-TAC4-1	NA		DNAJB5-AS1	NA
																																					SPG29	NA		ATG10-AS1	NA		C11orf73	NA
																																					TRE-CTC3-1	NA		PIRC107	NA		RASA4	NA
																																					TRAJ45	NA		DUSP14	NA		LY6G5C	NA
																																					IGAD1	NA		FAM71F1	NA		DEFB103A	NA
																																					SNAR-G2	NA		GLC3C	NA		IGHD3-3	NA
																																					FAM35A	NA		SALRNA3	NA		FRA11E	NA
																																					KCNIP4-IT1	NA		SPERT	NA		MNX1-AS2	NA
																																					MYP7	NA		C1QTNF1-AS1	NA		PRINS	NA
																																					SNORD115-35	NA		LINC01601	NA		HID1-AS1	NA
																																					MT1B	NA		OR2A25	NA		SNORD18B	NA
																																					TMEM57	NA		H2AFY2	NA		FAM109B	NA
																																					AIRE	NA		C7orf55-LUC7L2	NA		LINC01202	NA
																																					GAPLINC	NA		FAM132B	NA		CDKN2A-AS1	NA
																																					TMPRSS4-AS1	NA		SRGAP2-AS1	NA		FCGR1B	NA
																																					LINC01012	NA		SNORD114-11	NA		ERVFH21-1	NA
																																					IGKV1-9	NA		CASC4	NA		IGHD6-13	NA
																																					LINC01385	NA		EP400NL	NA		ZBTB20-AS3	NA
																																					ZNF670-ZNF695	NA		LINC00583	NA		C9orf3	NA
																																					PIRC22	NA		ERVH-7	NA		ZNF73	NA
																																					PDE3A	NA		RHOA-IT1	NA		OR4D10	NA
																																					C9orf142	NA		NCRUPAR	NA		NPIPB11	NA
																																					C15orf59-AS1	NA		HIST1H2AB	NA		FBXO36-IT1	NA
																																					PDCD4-AS1	NA		LINC00621	NA		IBD6	NA
																																					RRS1-AS1	NA		PIRC60	NA		DUXB	NA
																																					ZNF24	NA		SNORD115-39	NA		C14orf169	NA
																																					IDDM14	NA		PHACTR2-AS1	NA		LINC01065	NA
																																					C1orf189	NA		SNORD36B	NA		BTS1	NA
																																					ERVFC1-1	NA		FRA13B	NA		ERVW-15	NA
																																					LINC00459	NA		IGLC3	NA		C15orf43	NA
																																					TRA-CGC5-1	NA		C10orf25	NA		ETV5-AS1	NA
																																					USH1E	NA		LINC01309	NA		TRS-CGA4-1	NA
																																					IGKJ3	NA		PRR26	NA		SPACA7	NA
																																					HMMR-AS1	NA		RNVU1-20	NA		SNORD37	NA
																																					LINC01120	NA		HCG4B	NA		NPIPB3	NA
																																					DFNB26	NA		KIAA2012	NA		CHKB-CPT1B	NA
																																					LINC00624	NA		PIRC12	NA		OTSC3	NA
																																					C21orf91-OT1	NA		PRAMEF5	NA		PSORS5	NA
																																					FRA2C	NA		LINC00592	NA		MYEOV2	NA
																																					NMTRQ-TTG3-1	NA		MRT8	NA		ALS7	NA
																																					2007-02-01	NA		TRA-CGC4-1	NA		VIS1	NA
																																					ASB3	NA		FRA20B	NA		FAM230C	NA
																																					LSINCT5	NA		MUSTN1	NA		PSORS9	NA
																																					RORA-AS2	NA		USMG5	NA		LINC01255	NA
																																					SNORD114-24	NA		OR7G3	NA		TRS-AGA2-5	NA
																																					GUCY1B3	NA		SNORA64	NA		TRA-AGC1-1	NA
																																					OR2A12	NA		SNORD53	NA		SPRY4-IT1	NA
																																					SNORD114-17	NA		BARX1-AS1	NA		C6orf222	NA
																																					RNA28S1	NA		TRK-TTT13-1	NA		ATP5G2	NA
																																					LINC00555	NA		SDPR	NA		PIRC85	NA
																																					GINGF4	NA		TRR-TCT2-1	NA		PTPRJ-AS1	NA
																																					2007-03-01	NA		SNORD114-26	NA		LINC00152	NA
																																					CAMTA1-IT1	NA		CERS3-AS1	NA		LINC00959	NA
																																					LINC00598	NA		COL1A1	NA		ERVK-24	NA
																																					GARS	NA		LINC01100	NA		IGHD2OR15-2B	NA
																																					WDFY3-AS1	NA		CDRT12	NA		DUX4L5	NA
																																					LINC00637	NA		SNORD14C	NA		NCK1-AS1	NA
																																					FAM129A	NA		LINC00566	NA		IBD9	NA
																																					TMPRSS11E	NA		DPYD-IT1	NA		WARS2-IT1	NA
																																					FRA6D	NA		LINC00843	NA		TRT-CGT3-1	NA
																																					TRY-GTA11-1	NA		WBSCR2	NA		TSNAX-DISC1	NA
																																					TBC1D3G	NA		FAM27E4	NA		RNA28S1	NA
																																					MEIKIN	NA		TRF-GAA1-5	NA		FRA1D	NA
																																					LINC00846	NA		RASL10B	NA		TRR-TCT5-1	NA
																																					ERVW-4	NA		C4orf27	NA		IBA57-AS1	NA
																																					LINC01217	NA		LINC00529	NA		C1orf194	NA
																																					TBC1D29	NA		ATP5L	NA		EPT1	NA
																																					KIAA0391	NA		PRR30	NA		LINC00558	NA
																																					PPT2	NA		GLC1I	NA		TTTY19	NA
																																					BPIFB6	NA		KRTAP9-2	NA		SNAP47-AS1	NA
																																					UQCRHL	NA		LCE3B	NA		PIRC61	NA
																																					PRAMEF28	NA		IGHV5-51	NA		TWISTNB	NA
																																					HIST2H2AB	NA		TRL-TAA1-1	NA		SNORA70G	NA
																																					C9orf84	NA		LINC00969	NA		TRX-CAT1-8	NA
																																					SNHG8	NA		EML2-AS1	NA		SCAR3	NA
																																					TRQ-TTG5-1	NA		C7orf55	NA		LINC00315	NA
																																					LINC01586	NA		PAPD5	NA		OR51S1	NA
																																					LINC00345	NA		TMEM2	NA		CDC14C	NA
																																					LINC00540	NA		SNORA9	NA		PWP2	NA
																																					PSAP	NA		SNORD163	NA		PIRC88	NA
																																					TRR-CCT2-1	NA		LINC00266-3	NA		ITPR1-AS1	NA
																																					SNORA110	NA		TRR-ACG1-3	NA		C11orf95	NA
																																					TRAV10	NA		LINC00449	NA		SLC2A1-AS1	NA
																																					TRM-CAT5-1	NA		IGLV5-37	NA		HLA-DQB1-AS1	NA
																																					MYEOV2	NA		PDB5	NA		SNORD113-2	NA
																																					HCL3	NA		VPS52	NA		TRK-TTT2-1	NA
																																					TRAV7	NA		PIRC51	NA		EYCL1	NA
																																					PWRN4	NA		IGHV1OR15-5	NA		TRC-GCA2-3	NA
																																					NTM-AS1	NA		RNA5-8S3	NA		KRTAP2-4	NA
																																					FRA1J	NA		CTSD	NA		GTF2H2C_2	NA
																																					FAM188B	NA		PIRC13	NA		TRIM36-IT1	NA
																																					SNAR-H	NA		LINC01215	NA		FAM74A3	NA
																																					IGLV5-39	NA		SNORD98	NA		PIRC110	NA
																																					TRX-CAT1-3	NA		ST3GAL5-AS1	NA		PLPPR3	NA
																																					ATP5D	NA		ATPIF1	NA		SNORA11B	NA
																																					LAMA2	NA		POTEA	NA		SNORD3A	NA
																																					SAPCD1-AS1	NA		HIST1H2AH	NA		LINC01297	NA
																																					U2AF1	NA		RNR4	NA		MCF2L-AS1	NA
																																					TRK-CTT5-1	NA		SNORD29	NA		DFNA53	NA
																																					SPDYE17	NA		MRT26	NA		H19	NA
																																					IDDM16	NA		C3orf17	NA		LINC00319	NA
																																					FRA2K	NA		IGLV3-27	NA		SNAR-D	NA
																																					BTNL10	NA		SNORD115-20	NA		C17orf82	NA
																																					LINC00868	NA		LINC00441	NA		BACH1-IT2	NA
																																					HIST2H2AA3	NA		TRSUP-TTA3-1	NA		LINC00687	NA
																																					CCL14	NA		C16orf58	NA		FAM138E	NA
																																					TRR-ACG1-2	NA		SCZD2	NA		EHMT1-IT1	NA
																																					PDB6	NA		PWAR1	NA		HIST1H1T	NA
																																					PANDAR	NA		MCPH1-AS1	NA		TMEM161B-AS1	NA
																																					SNORD123	NA		PCAT29	NA		IGHD3-22	NA
																																					CMT1A	NA		SNORD49A	NA		LYPD8	NA
																																					IGHV4-38-2	NA		SNORD114-2	NA		CCL15	NA
																																					GLC1M	NA		RIMBP3B	NA		GPR179	NA
																																					SNORD116-9	NA		ERVK-30	NA		OR4K17	NA
																																					ACACA	NA		TRK-CTT4-1	NA		MINA	NA
																																					SNHG4	NA		BACE2	NA		PIRC78	NA
																																					DHFRL1	NA		LINC00404	NA		TRBV29OR9-2	NA
																																					CYMD	NA		HIST3H2A	NA		PIRC23	NA
																																					LINC00683	NA		GOLGA8Q	NA		FSBP	NA
																																					PIRC100	NA		HCG23	NA		FAM26D	NA
																																					TRK-TTT15-1	NA		FAM63B	NA		LINC00556	NA
																																					TRQ-TTG3-1	NA		WDR46	NA		OR10J1	NA
																																					TRAC	NA		RRS1-AS1	NA		TRBV12-5	NA
																																					IGHJ3	NA		GTF2IRD2	NA		C10orf113	NA
																																					PIRC25	NA		FAM160B1	NA		OR5H2	NA
																																					PIRC81	NA		LCE3C	NA		FRA8C	NA
																																					CSMD2-AS1	NA		TRI-AAT5-2	NA		ERVK3-6	NA
																																					SNORD138	NA		LINC00938	NA		BANF2	NA
																																					SNORD114-1	NA		DSCAM	NA		TRE-CTC16-1	NA
																																					PIRC84	NA		MAPT-AS1	NA		OR5AN1	NA
																																					C19orf68	NA		DYRK1A	NA		NARF-IT1	NA
																																					OR4F15	NA		LINC00397	NA		LINC00205	NA
																																					LINC00533	NA		LINC00562	NA		MYP15	NA
																																					HSPA1B	NA		NAMA	NA		FAM19A1	NA
																																					TRF-GAA6-1	NA		LSM14B	NA		S1PR2	NA
																																					NBPF11	NA		CYMD	NA		TRG	NA
																																					LINC00610	NA		PANO1	NA		LINC01432	NA
																																					TRV-CAC11-2	NA		SNORA62	NA		TRK-TTT3-4	NA
																																					IBD5	NA		MICALCL	NA		NTM-AS1	NA
																																					ICT1	NA		FRA2A	NA		HIST1H2BE	NA
																																					ANKRD1	NA		DDX11L6	NA		OR8K1	NA
																																					PARD3-AS1	NA		TRT-CGT4-1	NA		MEG3	NA
																																					LCAL1	NA		DFNA37	NA		MCCC1-AS1	NA
																																					HCL2	NA		MGAT3-AS1	NA		TRA-AGC10-1	NA
																																					TRAJ26	NA		SNORD113-9	NA		PROSC	NA
																																					WASF3-AS1	NA		STBD1	NA		MYCBP2-AS2	NA
																																					OR4D10	NA		IGHD1-14	NA		TRK-CTT5-1	NA
																																					TRC-GCA20-1	NA		GAGE5	NA		OTSC10	NA
																																					undefined	NA		C1QTNF3-AMACR	NA		IGHE	NA
																																					G6PC	NA		OR6C6	NA		MYP3	NA
																																					TRS-AGA2-6	NA		TTC25	NA		C11orf49	NA
																																					LINC00917	NA		C6orf203	NA		DDR1-AS1	NA
																																					LINC00691	NA		WISP1-OT1	NA		ST2	NA
																																					PCDH9-AS1	NA		SNORD47	NA		TRK-CTT14-1	NA
																																					EMC3-AS1	NA		TTTY2	NA		SNORD76	NA
																																					KDELC2	NA		FAM71A	NA		C10orf71-AS1	NA
																																					OR4Q3	NA		CARS-AS1	NA		MSK38	NA
																																					OR5M10	NA		ERVK-9	NA		ADD3-AS1	NA
																																					PIRC111	NA		PWAR5	NA		PPIAL4C	NA
																																					TRY-GTA12-1	NA		SNHG23	NA		OTSC8	NA
																																					DEFB103A	NA		RERG-IT1	NA		PWAR4	NA
																																					SLEN3	NA		ALS5	NA		C9orf173	NA
																																					ERVE-1	NA		SNORD114-13	NA		OR7D4	NA
																																					FAM129B	NA		IGKV1-9	NA		TRUND-NNN6-1	NA
																																					TRR-CCT6-2	NA		IBD7	NA		BORCS7-ASMT	NA
																																					TRS-AGA7-1	NA		LINC00221	NA		SNORD115-42	NA
																																					OR10H3	NA		SNAR-A3	NA		H1F0	NA
																																					SNORA10	NA		FOPNL	NA		WISP1	NA
																																					LINC01197	NA		RBMY1C	NA		ERVW-8	NA
																																					IGKV3-7	NA		FOXD1-AS1	NA		CSTB	NA
																																					PIRC109	NA		FRA1M	NA		FRA11I	NA
																																					VWA9	NA		RAB30-AS1	NA		PIRC31	NA
																																					C2orf82	NA		LINC00599	NA		EML2-AS1	NA
																																					TRA-AGC7-1	NA		MAST4-AS1	NA		TRAJ47	NA
																																					TMEM211	NA		DFNB31	NA		OR51L1	NA
																																					C11orf45	NA		ZNF595	NA		C11orf70	NA
																																					RNU11	NA		DFNB80	NA		SEPSECS-AS1	NA
																																					TRA-TGC3-1	NA		SNORD115-43	NA		C8orf46	NA
																																					PCDHGB3	NA		TRS-GCT3-1	NA		LINC00936	NA
																																					SNORD115-1	NA		LINC00210	NA		CAHM	NA
																																					SMR3A	NA		BACH1-IT1	NA		SNORD60	NA
																																					OR8I2	NA		OR8H3	NA		WS2B	NA
																																					LINC01384	NA		LINC01584	NA		FRA9A	NA
																																					FAM179B	NA		TRS-CGA4-1	NA		SNORD43	NA
																																					OR6M1	NA		ASAP1-IT2	NA		C4orf32	NA
																																					TMEM161B-AS1	NA		SNORD114-24	NA		MESDC2	NA
																																					XGR	NA		FAM74A6	NA		ESRG	NA
																																					TRR-CCG1-2	NA		CD3EAP	NA		LINC01020	NA
																																					SNORD76	NA		NCBP2-AS2	NA		SNORD82	NA
																																					TRL-CAA2-1	NA		OR2T34	NA		GLC1D	NA
																																					C16orf58	NA		NARS	NA		TRAJ39	NA
																																					TRAV2	NA		TRBV12-3	NA		TRAJ43	NA
																																					LINC01314	NA		HIST2H4A	NA		USMG5	NA
																																					FAM71B	NA		SHANK2-AS2	NA		TRUND-NNN10-1	NA
																																					BMIQ6	NA		RRP1	NA		SPIB	NA
																																					SPINK14	NA		IGKV4-1	NA		RARS	NA
																																					TRBV6-6	NA		LINC01422	NA		IL9	NA
																																					TRV-TAC1-1	NA		PDE3A	NA		TRP-AGG2-6	NA
																																					TRAJ17	NA		SNORD38B	NA		LINC01399	NA
																																					CFAP54	NA		KRTAP2-2	NA		SNORD33	NA
																																					OR5D14	NA		VTRNA2-1	NA		ISPD-AS1	NA
																																					OR10G9	NA		TBC1D3E	NA		C2orf57	NA
																																					LINC00260	NA		GSTT1	NA		OR2AP1	NA
																																					C1GALT1C1L	NA		FAM197Y3	NA		TMIGD1	NA
																																					MER5	NA		2011-03-01	NA		IGKV1-33	NA
																																					LINC01304	NA		SNORD14A	NA		RNU12	NA
																																					TRF-GAA3-1	NA		OR9G9	NA		IGHJ1	NA
																																					SPG24	NA		TRBJ1-6	NA		SDR9C7	NA
																																					SPATA31D4	NA		EGLN3-AS1	NA		FAM157B	NA
																																					TRQ-CTG6-1	NA		LINC00950	NA		NES	NA

## Sheet: S4-pair-wise correlation data
Correlation (R) and p-values for the pairwise correlation studies presented in figure 7A
R values
	AMBN	COLQ	ELFN1	HAS3	HSPE1	LMAN1	LRP5	MUC6	RAMP2	RUVBL2	SSBP1	UMOD
AMBN	1	-0.00686792	-0.13653	0.2796	0.0466142	0.00300834	0.00726856	-0.0360259	0.0623956	0.00853677	0.0686705	0.0298563
COLQ	-0.00686792	1	-0.112978	0.415044	0.00552954	-0.0898018	0.128512	0.00638623	0.232352	0.0623391	-0.0769467	-0.00754795
ELFN1	-0.13653	-0.112978	1	-0.107137	-0.104186	0.0448844	-0.0324506	0.192124	-0.13122	0.0579095	-0.074386	-0.044547
HAS3	0.2796	0.415044	-0.107137	1	-0.00873354	0.034738	0.23972	0.145128	0.0957924	0.215666	0.00153826	0.00684575
HSPE1	0.0466142	0.00552954	-0.104186	-0.00873354	1	-0.218158	0.0716419	0.0788623	0.179165	0.462923	0.549639	0.18242
LMAN1	0.00300834	-0.0898018	0.0448844	0.034738	-0.218158	1	0.0580926	-0.0247825	-0.138293	-0.276502	-0.0843693	-0.0754844
LRP5	0.00726856	0.128512	-0.0324506	0.23972	0.0716419	0.0580926	1	0.168083	0.122819	0.2609	-0.117491	0.0815989
MUC6	-0.0360259	0.00638623	0.192124	0.145128	0.0788623	-0.0247825	0.168083	1	-0.138086	0.176356	-0.0829113	0.0667849
RAMP2	0.0623956	0.232352	-0.13122	0.0957924	0.179165	-0.138293	0.122819	-0.138086	1	0.198711	0.131776	0.135536
RUVBL2	0.00853677	0.0623391	0.0579095	0.215666	0.462923	-0.276502	0.2609	0.176356	0.198711	1	0.544627	0.144553
SSBP1	0.0686705	-0.0769467	-0.074386	0.00153826	0.549639	-0.0843693	-0.117491	-0.0829113	0.131776	0.544627	1	0.164519
UMOD	0.0298563	-0.00754795	-0.044547	0.00684575	0.18242	-0.0754844	0.0815989	0.0667849	0.135536	0.144553	0.164519	1
p-values
	AMBN	COLQ	ELFN1	HAS3	HSPE1	LMAN1	LRP5	MUC6	RAMP2	RUVBL2	SSBP1	UMOD
AMBN	0	0.932	0.0881876	0.000391	0.562	0.970171	0.928011	0.654195	0.437558	0.915	0.393	0.710495
COLQ	0.931969	0	0.158889	6.49e-08	0.945	0.263361	0.108705	0.93673	0.0034084	0.438	0.338	0.925251
ELFN1	0.0881876	0.159	0	0.182	0.194	0.576716	0.686609	0.0159273	0.101394	0.471	0.355	0.579588
HAS3	0.00039057	6.49e-08	0.181698	0	0.914	0.665801	0.00249544	0.0697508	0.232701	0.00667	0.985	0.932188
HSPE1	0.562102	0.945	0.194098	0.914	0	0.00605468	0.372584	0.326211	0.0247559	1.03e-09	8.99e-14	0.0222152
LMAN1	0.970171	0.263	0.576716	0.666	0.00605	0	0.469869	0.758014	0.0841201	0.000456	0.293	0.347423
LRP5	0.928011	0.109	0.686609	0.0025	0.373	0.469869	0	0.0353577	0.125418	0.000966	0.143	0.30965
MUC6	0.654195	0.937	0.0159273	0.0698	0.326	0.758014	0.0353577	0	0.0845888	0.0271	0.302	0.405943
RAMP2	0.437558	0.00341	0.101394	0.233	0.0248	0.0841201	0.125418	0.0845888	0	0.0126	0.0999	0.0905481
RUVBL2	0.915493	0.438	0.471272	0.00667	1.03e-09	0.0004558	0.00096583	0.0271449	0.0126001	0	1.66e-13	0.0708766
SSBP1	0.392788	0.338	0.354504	0.985	8.99e-14	0.293456	0.142792	0.301907	0.0999427	1.66e-13	0	0.039495
UMOD	0.710495	0.925	0.579588	0.932	0.0222	0.347423	0.30965	0.405943	0.0905481	0.0709	0.0395	0

## Sheet: S5-Correction for multiple test
FDR correction (0.05) usinf Benjamini-Hochberg method per figure number		https://tools.carbocation.com/FDR
Figure 2 and 3
	OS (log-rank test) Z=2
Gene list	p-value	Rank	ID	Original P value	Critical Value	Benjamini-Hochberg Adjusted P value	Significant using an FDR of 0.05?
AMBN	0.000626	1	MUC6	2.1e-05	0.00416667	0.000252	Yes
COLQ	0.0156	2	HSPE1	0.000237	0.00833333	0.001422	Yes
ELFN1	0.0468	3	AMBN	0.000626	0.0125	0.002504	Yes
HAS3	0.0134	4	SSBP1	0.00818	0.0166667	0.02454	Yes
HSPE1	0.000237	5	HAS3	0.0134	0.0208333	0.03216	Yes
LMAN1	0.0426	6	LRP5	0.0136	0.025	0.0272	Yes
LRP5	0.0136	7	COLQ	0.0156	0.0291667	0.0267429	Yes
MUC6	2.1e-05	8	RAMP2	0.0177	0.0333333	0.02655	Yes
RAMP2	0.0177	9	RUVBL2	0.0214	0.0375	0.0285333	Yes
RUVBL2	0.0214	10	UMOD	0.0309	0.0416667	0.03708	Yes
SSBP1	0.00818	11	LMAN1	0.0426	0.0458333	0.0464727	Yes
UMOD	0.0309	12	ELFN1	0.0468	0.05	0.0468	Yes
Supplementary file, S3
	OS (PCAT)- autocalculate
Gene list	p-value	Rank	ID	Original P value	Critical Value	Benjamini-Hochberg Adjusted P value	Significant using an FDR of 0.05?
AMBN	0.00874	1	RUVBL2	1e-06	0.00416667	1.2e-05	Yes
COLQ	0.0468	2	MUC6	1e-05	0.00833333	6e-05	Yes
ELFN1	0.0234	3	SSBP1	2e-05	0.0125	8e-05	Yes
HAS3	0.0049	4	HSPE1	5e-05	0.0166667	0.00015	Yes
HSPE1	5e-05	5	UMOD	0.00034	0.0208333	0.000816	Yes
LMAN1	0.0448	6	RAMP2	0.00464	0.025	0.00928	Yes
LRP5	0.00659	7	HAS3	0.0049	0.0291667	0.0084	Yes
MUC6	1e-05	8	LRP5	0.00659	0.0333333	0.009885	Yes
RAMP2	0.00464	9	AMBN	0.00874	0.0375	0.0116533	Yes
RUVBL2	1e-06	10	ELFN1	0.0234	0.0416667	0.02808	Yes
SSBP1	2e-05	11	LMAN1	0.0448	0.0458333	0.0488727	Yes
UMOD	0.00034	12	COLQ	0.0468	0.05	0.0468	Yes
	OS (PCAT)- mean
Gene list	p-value	Rank	ID	Original P value	Critical Value	Benjamini-Hochberg Adjusted P value	Significant using an FDR of 0.05?
AMBN	0.01113	1	RUVBL2	0.00031	0.00416667	0.00372	Yes
COLQ	0.43	2	SSBP1	0.00043	0.00833333	0.00258	Yes
ELFN1	0.26	3	MUC6	0.00051	0.0125	0.00204	Yes
HAS3	0.81	4	HSPE1	0.00159	0.0166667	0.00477	Yes
HSPE1	0.00159	5	AMBN	0.01113	0.0208333	0.026712	Yes
LMAN1	0.22	6	RAMP2	0.02307	0.025	0.04614	Yes
LRP5	0.094	7	UMOD	0.056	0.0291667	0.096	No
MUC6	0.00051	8	LRP5	0.094	0.0333333	0.141	No
RAMP2	0.02307	9	LMAN1	0.22	0.0375	0.293333	No
RUVBL2	0.00031	10	ELFN1	0.26	0.0416667	0.312	No
SSBP1	0.00043	11	COLQ	0.43	0.0458333	0.469091	No
UMOD	0.056	12	HAS3	0.81	0.05	0.81	No
	OS (OS and histology columns), cutoff= auto-calculate									Histology (OS and histology columns)
Gene list	p-value	Rank	ID	Original P value	Critical Value	Benjamini-Hochberg Adjusted P value	Significant using an FDR of 0.05?		Gene list	p-value	Rank	ID	Original P value	Critical Value	Benjamini-Hochberg Adjusted P value	Significant using an FDR of 0.05?
AMBN	0.014	1	RAMP2	0.001	0.00416667	0.012	Yes		AMBN	0.005	1	LRP5	0.001	0.00416667	0.012	Yes
COLQ	0.32	2	RUVBL2	0.001	0.00833333	0.006	Yes		COLQ	0.002	2	RAMP2	0.001	0.00833333	0.006	Yes
ELFN1	0.057	3	HSPE1	0.001	0.0125	0.004	Yes		ELFN1	0.003	3	COLQ	0.002	0.0125	0.008	Yes
HAS3	0.572	4	MUC6	0.002	0.0166667	0.006	Yes		HAS3	0.002	4	HAS3	0.002	0.0166667	0.006	Yes
HSPE1	0.001	5	SSBP1	0.002	0.0208333	0.0048	Yes		HSPE1	0.004	5	LMAN1	0.002	0.0208333	0.0048	Yes
LMAN1	0.093	6	LRP5	0.003	0.025	0.006	Yes		LMAN1	0.002	6	ELFN1	0.003	0.025	0.006	Yes
LRP5	0.003	7	UMOD	0.008	0.0291667	0.0137143	Yes		LRP5	0.001	7	UMOD	0.003	0.0291667	0.00514286	Yes
MUC6	0.002	8	AMBN	0.014	0.0333333	0.021	Yes		MUC6	0.005	8	HSPE1	0.004	0.0333333	0.006	Yes
RAMP2	0.001	9	ELFN1	0.057	0.0375	0.076	No		RAMP2	0.001	9	AMBN	0.005	0.0375	0.00666667	Yes
RUVBL2	0.001	10	LMAN1	0.093	0.0416667	0.1116	No		RUVBL2	0.006	10	MUC6	0.005	0.0416667	0.006	Yes
SSBP1	0.002	11	COLQ	0.32	0.0458333	0.349091	No		SSBP1	0.007	11	RUVBL2	0.006	0.0458333	0.00654545	Yes
UMOD	0.008	12	HAS3	0.572	0.05	0.572	No		UMOD	0.003	12	SSBP1	0.007	0.05	0.007	Yes
Supplementary figure 1 (B)
Gene list	p-value for Z=2	Rank	ID	Original P value	Critical Value	Benjamini-Hochberg Adjusted P value	Significant using an FDR of 0.05?
AMBN	0.976	1	LRP5	7.98e-06	0.00416667	9.576e-05	Yes
COLQ	0.23	2	SSBP1	0.078	0.00833333	0.468	No
ELFN1	0.975	3	HAS3	0.105	0.0125	0.42	No
HAS3	0.105	4	MUC6	0.109	0.0166667	0.327	No
HSPE1	0.327	5	RUVBL2	0.178	0.0208333	0.4272	No
LMAN1	0.378	6	COLQ	0.23	0.025	0.46	No
LRP5	7.98e-06	7	HSPE1	0.327	0.0291667	0.560571	No
MUC6	0.109	8	LMAN1	0.378	0.0333333	0.567	No
RAMP2	0.632	9	RAMP2	0.632	0.0375	0.842667	No
RUVBL2	0.178	10	UMOD	0.817	0.0416667	0.9804	No
SSBP1	0.078	11	ELFN1	0.975	0.0458333	1	No
UMOD	0.817	12	AMBN	0.976	0.05	0.976	No
Figure 4 A
Gene list	p-value	Rank	ID	Original P value	Critical Value	Benjamini-Hochberg Adjusted P value	Significant using an FDR of 0.05?
AMBN	0.13	1	RAMP2	0.000452	0.00416667	0.005424	Yes
COLQ	0.0183	2	HSPE1	0.00258	0.00833333	0.01548	Yes
ELFN1	0.671	3	HAS3	0.0093	0.0125	0.0372	Yes
HAS3	0.0093	4	COLQ	0.0183	0.0166667	0.0549	No
HSPE1	0.00258	5	LRP5	0.097	0.0208333	0.2328	No
LMAN1	0.837	6	AMBN	0.13	0.025	0.26	No
LRP5	0.097	7	SSBP1	0.269	0.0291667	0.461143	No
MUC6	0.747	8	ELFN1	0.671	0.0333333	1	No
RAMP2	0.000452	9	MUC6	0.747	0.0375	0.996	No
RUVBL2	0.823	10	RUVBL2	0.823	0.0416667	0.9876	No
SSBP1	0.269	11	LMAN1	0.837	0.0458333	0.913091	No
UMOD	0.875	12	UMOD	0.875	0.05	0.875	No
Figure 4 B
Gene list	Welch's p-value	Rank	ID	Original P value	Critical Value	Benjamini-Hochberg Adjusted P value	Significant using an FDR of 0.05?
AMBN	0.453	1	RUVBL2	0.0001	0.00416667	0.0012	Yes
COLQ	0.992	2	HSPE1	0.001	0.00833333	0.006	Yes
ELFN1	0.177	3	SSBP1	0.0046	0.0125	0.0184	Yes
HAS3	0.006	4	HAS3	0.006	0.0166667	0.018	Yes
HSPE1	0.001	5	LMAN1	0.023	0.0208333	0.0552	No
LMAN1	0.023	6	ELFN1	0.177	0.025	0.354	No
LRP5	0.31	7	LRP5	0.31	0.0291667	0.531429	No
MUC6	0.54	8	UMOD	0.319	0.0333333	0.4785	No
RAMP2	0.88	9	AMBN	0.453	0.0375	0.604	No
RUVBL2	0.0001	10	MUC6	0.54	0.0416667	0.648	No
SSBP1	0.0046	11	RAMP2	0.88	0.0458333	0.96	No
UMOD	0.319	12	COLQ	0.992	0.05	0.992	No
Figures 5 and 6
Gene list	Spearmann p-value	Rank	ID	Original P value	Critical Value	Benjamini-Hochberg Adjusted P value	Significant using an FDR of 0.05?		Gene list	Pearson p-value	Rank	ID	Original P value	Critical Value	Benjamini-Hochberg Adjusted P value	Significant using an FDR of 0.05?
AMBN	1.805e-05	1	ELFN1	1.21e-20	0.00454545	1.331e-19	Yes		AMBN	2.211e-05	1	ELFN1	4.35e-16	0.00454545	4.785e-15	Yes
COLQ	5.34e-13	2	SSBP1	3.78e-13	0.00909091	2.079e-12	Yes		COLQ	3.59e-11	2	SSBP1	5.5e-14	0.00909091	3.025e-13	Yes
ELFN1	1.21e-20	3	COLQ	5.34e-13	0.0136364	1.958e-12	Yes		ELFN1	4.35e-16	3	HAS3	2.53e-11	0.0136364	9.27667e-11	Yes
HAS3	6.04e-10	4	HAS3	6.04e-10	0.0181818	1.661e-09	Yes		HAS3	2.53e-11	4	COLQ	3.59e-11	0.0181818	9.8725e-11	Yes
HSPE1	1.07e-08	5	RUVBL2	1.04e-09	0.0227273	2.288e-09	Yes		HSPE1	1.07e-10	5	HSPE1	1.07e-10	0.0227273	2.354e-10	Yes
LMAN1	7.17e-05	6	LRP5	1.48e-09	0.0272727	2.71333e-09	Yes		LMAN1	3.84e-05	6	LRP5	3.6e-08	0.0272727	6.6e-08	Yes
LRP5	1.48e-09	7	MUC6	8.12e-09	0.0318182	1.276e-08	Yes		LRP5	3.6e-08	7	MUC6	3.8e-08	0.0318182	5.97143e-08	Yes
MUC6	8.12e-09	8	HSPE1	1.07e-08	0.0363636	1.47125e-08	Yes		MUC6	3.8e-08	8	RUVBL2	6.96e-08	0.0363636	9.57e-08	Yes
RAMP2	3.38e-06	9	RAMP2	3.38e-06	0.0409091	4.13111e-06	Yes		RAMP2	7e-07	9	RAMP2	7e-07	0.0409091	8.55556e-07	Yes
RUVBL2	1.04e-09	10	AMBN	1.81e-05	0.0454545	1.991e-05	Yes		RUVBL2	6.96e-08	10	AMBN	2.21e-05	0.0454545	2.431e-05	Yes
SSBP1	3.78e-13	11	LMAN1	7.17e-05	0.05	7.17e-05	Yes		SSBP1	5.5e-14	11	LMAN1	3.84e-05	0.05	3.84e-05	Yes
UMOD	No data								UMOD	No data
Figure 7A
Gene list	Interaction with AMBN	ID	ID	Original P value	Critical Value	Benjamini-Hochberg Adjusted P value	Significant using an FDR of 0.05?		Gene list	Interaction with COLQ	Rank	ID	Original P value	Critical Value	Benjamini-Hochberg Adjusted P value	Significant using an FDR of 0.05?				Gene list	Interaction with ELFN1		Rank	ID	Original P value	Critical Value	Benjamini-Hochberg Adjusted P value	Significant using an FDR of 0.05?				Gene list	Interaction with HAS3	Rank	ID	Original P value	Critical Value	Benjamini-Hochberg Adjusted P value	Significant using an FDR of 0.05?				Gene list	Interaction with HSPE1		Rank	ID	Original P value	Critical Value
AMBN	0	1	AMBN	0	0.00416667	0	Yes		AMBN	0.931969	1	COLQ	0	0.00416667	0	Yes				AMBN	0.0881876		1	ELFN1	0	0.00416667	0	Yes				AMBN	0.00039057	1	HAS3	0	0.00416667	0	Yes				AMBN	0.562102		1	HSPE1	0	0.00416667
COLQ	0.932	2	HAS3	0.000391	0.00833333	0.002346	Yes		COLQ	0	2	HAS3	6.49e-08	0.00833333	3.894e-07	Yes				COLQ	0.159		2	MUC6	0.0159273	0.00833333	0.0955639	No				COLQ	6.49e-08	2	COLQ	6.49e-08	0.00833333	3.894e-07	Yes				COLQ	0.945		2	SSBP1	8.99e-14	0.00833333
ELFN1	0.0881876	3	ELFN1	0.0881876	0.0125	0.352751	No		ELFN1	0.158889	3	RAMP2	0.0034084	0.0125	0.0136336	Yes				ELFN1	0		3	AMBN	0.0881876	0.0125	0.352751	No				ELFN1	0.181698	3	AMBN	0.00039057	0.0125	0.00156228	Yes				ELFN1	0.194098		3	RUVBL2	1.03e-09	0.0125
HAS3	0.000391	4	SSBP1	0.393	0.0166667	1	No		HAS3	6.49e-08	4	LRP5	0.108705	0.0166667	0.326115	No				HAS3	0.182		4	RAMP2	0.101394	0.0166667	0.304182	No				HAS3	0	4	LRP5	0.00249544	0.0166667	0.00748632	Yes				HAS3	0.914		4	LMAN1	0.00605468	0.0166667
HSPE1	0.562	5	RAMP2	0.437558	0.0208333	1	No		HSPE1	0.945	5	ELFN1	0.158889	0.0208333	0.381334	No				HSPE1	0.194		5	COLQ	0.159	0.0208333	0.3816	No				HSPE1	0.914	5	RUVBL2	0.00667	0.0208333	0.016008	Yes				HSPE1	0		5	UMOD	0.0222152	0.0208333
LMAN1	0.970171	6	HSPE1	0.562	0.025	1	No		LMAN1	0.263361	6	LMAN1	0.263361	0.025	0.526721	No				LMAN1	0.576716		6	HAS3	0.182	0.025	0.364	No				LMAN1	0.665801	6	MUC6	0.0697508	0.025	0.139502	No				LMAN1	0.00605468		6	RAMP2	0.0247559	0.025
LRP5	0.928011	7	MUC6	0.654195	0.0291667	1	No		LRP5	0.108705	7	SSBP1	0.338	0.0291667	0.579429	No				LRP5	0.686609		7	HSPE1	0.194	0.0291667	0.332571	No				LRP5	0.00249544	7	ELFN1	0.181698	0.0291667	0.311482	No				LRP5	0.372584		7	ELFN1	0.194098	0.0291667
MUC6	0.654195	8	UMOD	0.710495	0.0333333	1	No		MUC6	0.93673	8	RUVBL2	0.438	0.0333333	0.657	No				MUC6	0.0159273		8	SSBP1	0.355	0.0333333	0.5325	No				MUC6	0.0697508	8	RAMP2	0.232701	0.0333333	0.349051	No				MUC6	0.326211		8	MUC6	0.326211	0.0333333
RAMP2	0.437558	9	RUVBL2	0.915	0.0375	1	No		RAMP2	0.0034084	9	UMOD	0.925251	0.0375	1	No				RAMP2	0.101394		9	RUVBL2	0.471	0.0375	0.628	No				RAMP2	0.232701	9	LMAN1	0.665801	0.0375	0.887735	No				RAMP2	0.0247559		9	LRP5	0.372584	0.0375
RUVBL2	0.915	10	LRP5	0.928011	0.0416667	1	No		RUVBL2	0.438	10	AMBN	0.931969	0.0416667	1	No				RUVBL2	0.471		10	LMAN1	0.576716	0.0416667	0.692059	No				RUVBL2	0.00667	10	HSPE1	0.914	0.0416667	1	No				RUVBL2	1.03e-09		10	AMBN	0.562102	0.0416667
SSBP1	0.393	11	COLQ	0.932	0.0458333	1	No		SSBP1	0.338	11	MUC6	0.93673	0.0458333	1	No				SSBP1	0.355		11	UMOD	0.579588	0.0458333	0.632278	No				SSBP1	0.985	11	UMOD	0.932188	0.0458333	1	No				SSBP1	8.99e-14		11	HAS3	0.914	0.0458333
UMOD	0.710495	12	LMAN1	0.970171	0.05	0.970171	No		UMOD	0.925251	12	HSPE1	0.945	0.05	0.945	No				UMOD	0.579588		12	LRP5	0.686609	0.05	0.686609	No				UMOD	0.932188	12	SSBP1	0.985	0.05	0.985	No				UMOD	0.0222152		12	COLQ	0.945	0.05
Gene list	Interaction with LRP5	Rank	ID	Original P value	Critical Value	Benjamini-Hochberg Adjusted P value	Significant using an FDR of 0.05?		Gene list	Interaction with MUC6	Rank	ID	Original P value	Critical Value	Benjamini-Hochberg Adjusted P value	Significant using an FDR of 0.05?				Gene list	Interaction with RAMP2		Rank	ID	Original P value	Critical Value	Benjamini-Hochberg Adjusted P value	Significant using an FDR of 0.05?				Gene list	Interaction with RUVBL2	Rank	ID	Original P value	Critical Value	Benjamini-Hochberg Adjusted P value	Significant using an FDR of 0.05?				Gene list	Interaction with SSBP1		Rank	ID	Original P value	Critical Value
AMBN	0.928011	1	LRP5	0	0.00416667	0	Yes		AMBN	0.654195	1	MUC6	0	0.00416667	0	Yes				AMBN	0.437558		1	RAMP2	0	0.00416667	0	Yes				AMBN	0.915493	1	RUVBL2	0	0.00416667	0	Yes				AMBN	0.392788		1	SSBP1	0	0.00416667
COLQ	0.109	2	RUVBL2	0.000966	0.00833333	0.005796	Yes		COLQ	0.937	2	ELFN1	0.0159273	0.00833333	0.0955639	No				COLQ	0.00341		2	COLQ	0.00341	0.00833333	0.02046	Yes				COLQ	0.438	2	SSBP1	1.66e-13	0.00833333	9.96e-13	Yes				COLQ	0.338		2	HSPE1	8.99e-14	0.00833333
ELFN1	0.686609	3	HAS3	0.0025	0.0125	0.01	Yes		ELFN1	0.0159273	3	RUVBL2	0.0271	0.0125	0.1084	No				ELFN1	0.101394		3	RUVBL2	0.0126	0.0125	0.0504	No				ELFN1	0.471272	3	HSPE1	1.03e-09	0.0125	4.12e-09	Yes				ELFN1	0.354504		3	RUVBL2	1.66e-13	0.0125
HAS3	0.0025	4	MUC6	0.0353577	0.0166667	0.106073	No		HAS3	0.0698	4	LRP5	0.0353577	0.0166667	0.106073	No				HAS3	0.233		4	HSPE1	0.0248	0.0166667	0.0744	No				HAS3	0.00667	4	LMAN1	0.0004558	0.0166667	0.0013674	Yes				HAS3	0.985		4	UMOD	0.039495	0.0166667
HSPE1	0.373	5	COLQ	0.109	0.0208333	0.2616	No		HSPE1	0.326	5	HAS3	0.0698	0.0208333	0.16752	No				HSPE1	0.0248		5	LMAN1	0.0841201	0.0208333	0.201888	No				HSPE1	1.03e-09	5	LRP5	0.00096583	0.0208333	0.00231799	Yes				HSPE1	8.99e-14		5	RAMP2	0.0999427	0.0208333
LMAN1	0.469869	6	RAMP2	0.125418	0.025	0.250837	No		LMAN1	0.758014	6	RAMP2	0.0845888	0.025	0.169178	No				LMAN1	0.0841201		6	MUC6	0.0845888	0.025	0.169178	No				LMAN1	0.0004558	6	HAS3	0.00667	0.025	0.01334	Yes				LMAN1	0.293456		6	LRP5	0.142792	0.025
LRP5	0	7	SSBP1	0.143	0.0291667	0.245143	No		LRP5	0.0353577	7	SSBP1	0.302	0.0291667	0.517714	No				LRP5	0.125418		7	UMOD	0.0905481	0.0291667	0.155225	No				LRP5	0.00096583	7	RAMP2	0.0126001	0.0291667	0.0216001	Yes				LRP5	0.142792		7	LMAN1	0.293456	0.0291667
MUC6	0.0353577	8	UMOD	0.30965	0.0333333	0.464475	No		MUC6	0	8	HSPE1	0.326	0.0333333	0.489	No				MUC6	0.0845888		8	SSBP1	0.0999	0.0333333	0.14985	No				MUC6	0.0271449	8	MUC6	0.0271449	0.0333333	0.0407173	Yes				MUC6	0.301907		8	MUC6	0.301907	0.0333333
RAMP2	0.125418	9	HSPE1	0.373	0.0375	0.497333	No		RAMP2	0.0845888	9	UMOD	0.405943	0.0375	0.541258	No				RAMP2	0		9	ELFN1	0.101394	0.0375	0.135192	No				RAMP2	0.0126001	9	UMOD	0.0708766	0.0375	0.0945022	No				RAMP2	0.0999427		9	COLQ	0.338	0.0375
RUVBL2	0.000966	10	LMAN1	0.469869	0.0416667	0.563843	No		RUVBL2	0.0271	10	AMBN	0.654195	0.0416667	0.785034	No				RUVBL2	0.0126		10	LRP5	0.125418	0.0416667	0.150502	No				RUVBL2	0	10	COLQ	0.438	0.0416667	0.5256	No				RUVBL2	1.66e-13		10	ELFN1	0.354504	0.0416667
SSBP1	0.143	11	ELFN1	0.686609	0.0458333	0.749028	No		SSBP1	0.302	11	LMAN1	0.758014	0.0458333	0.826924	No				SSBP1	0.0999		11	HAS3	0.233	0.0458333	0.254182	No				SSBP1	1.66e-13	11	ELFN1	0.471272	0.0458333	0.514115	No				SSBP1	0		11	AMBN	0.392788	0.0458333
UMOD	0.30965	12	AMBN	0.928011	0.05	0.928011	No		UMOD	0.405943	12	COLQ	0.937	0.05	0.937	No				UMOD	0.0905481		12	AMBN	0.437558	0.05	0.437558	No				UMOD	0.0708766	12	AMBN	0.915493	0.05	0.915493	No				UMOD	0.039495		12	HAS3	0.985	0.05
Figures 7B and C	Not applicable
Figure 7D
Gene 1	Gene 2	Weight	Network group	Network
HSPE1	SSBP1	0.0132089	Co-expression	Mallon-McKay-2013
PPIAL4A	SSBP1	0.0273182	Co-expression	Mallon-McKay-2013
PPIAL4A	HSPE1	0.0131194	Co-expression	Mallon-McKay-2013
FOXL1	AMBN	0.0189957	Co-expression	Mallon-McKay-2013
FOXL1	COLQ	0.0178065	Co-expression	Mallon-McKay-2013
NFATC4	AMBN	0.0157152	Co-expression	Mallon-McKay-2013
NFATC4	COLQ	0.0162717	Co-expression	Mallon-McKay-2013
SNRPF	SSBP1	0.0144053	Co-expression	Mallon-McKay-2013
SNRPF	HSPE1	0.00694863	Co-expression	Mallon-McKay-2013
SNRPF	PPIAL4A	0.0139036	Co-expression	Mallon-McKay-2013
FERMT1	HAS3	0.0287465	Co-expression	Mallon-McKay-2013
SNRPE	SSBP1	0.0167869	Co-expression	Mallon-McKay-2013
SNRPE	HSPE1	0.00793103	Co-expression	Mallon-McKay-2013
SNRPE	SNRPF	0.00896407	Co-expression	Mallon-McKay-2013
SNRPG	SSBP1	0.0118908	Co-expression	Mallon-McKay-2013
SNRPG	HSPE1	0.00584465	Co-expression	Mallon-McKay-2013
SNRPG	PPIAL4A	0.0120553	Co-expression	Mallon-McKay-2013
SNRPG	SNRPF	0.00622723	Co-expression	Mallon-McKay-2013
SNRPG	SNRPE	0.00750344	Co-expression	Mallon-McKay-2013
FAM111B	SSBP1	0.0276565	Co-expression	Mallon-McKay-2013
FAM111B	HSPE1	0.0119079	Co-expression	Mallon-McKay-2013
FAM111B	SNRPF	0.0131843	Co-expression	Mallon-McKay-2013
FAM111B	SNRPE	0.0155996	Co-expression	Mallon-McKay-2013
FAM111B	SNRPG	0.011069	Co-expression	Mallon-McKay-2013
TRPM5	MUC6	0.0122505	Co-expression	Mallon-McKay-2013
TAL2	AMBN	0.0203838	Co-expression	Mallon-McKay-2013
TAL2	FOXL1	0.0139816	Co-expression	Mallon-McKay-2013
ZSCAN12	AMBN	0.0116488	Co-expression	Mallon-McKay-2013
ZSCAN12	COLQ	0.0118355	Co-expression	Mallon-McKay-2013
SOX8	ELFN1	0.0167706	Co-expression	Mallon-McKay-2013
FBLN7	AMBN	0.0197403	Co-expression	Mallon-McKay-2013
FBLN7	FOXL1	0.0171913	Co-expression	Mallon-McKay-2013
FBLN7	NFATC4	0.0140492	Co-expression	Mallon-McKay-2013
STON2	AMBN	0.0303795	Co-expression	Mallon-McKay-2013
STON2	ZSCAN12	0.0139371	Co-expression	Mallon-McKay-2013
PAX7	AMBN	0.023334	Co-expression	Mallon-McKay-2013
PAX7	TRPM5	0.0103482	Co-expression	Mallon-McKay-2013
IRX1	AMBN	0.025579	Co-expression	Mallon-McKay-2013
IRX1	GRHL3	0.0177979	Co-expression	Mallon-McKay-2013
IRX1	PAX7	0.0219525	Co-expression	Mallon-McKay-2013
PALM3	HAS3	0.0262447	Co-expression	Mallon-McKay-2013
FOXB1	ELFN1	0.0177894	Co-expression	Mallon-McKay-2013
HSPE1	SSBP1	0.00953934	Co-expression	Rieger-Chu-2004
SNRPF	SSBP1	0.00578351	Co-expression	Rieger-Chu-2004
SNRPF	HSPE1	0.00635319	Co-expression	Rieger-Chu-2004
SNRPE	SSBP1	0.0127877	Co-expression	Rieger-Chu-2004
SNRPE	HSPE1	0.0167383	Co-expression	Rieger-Chu-2004
SNRPE	SNRPF	0.0102975	Co-expression	Rieger-Chu-2004
SNRPG	SSBP1	0.00497322	Co-expression	Rieger-Chu-2004
SNRPG	HSPE1	0.00565741	Co-expression	Rieger-Chu-2004
SNRPG	SNRPF	0.00343046	Co-expression	Rieger-Chu-2004
SNRPG	SNRPE	0.00890715	Co-expression	Rieger-Chu-2004
PAX7	COLQ	0.0032363	Co-expression	Rieger-Chu-2004
PAX7	ZSCAN12	0.00628602	Co-expression	Rieger-Chu-2004
UMOD	MUC6	0.0108851	Co-expression	Innocenti-Brown-2011
FOXL1	MUC6	0.0163507	Co-expression	Innocenti-Brown-2011
FOXL1	UMOD	0.00563682	Co-expression	Innocenti-Brown-2011
GRHL3	HAS3	0.0288579	Co-expression	Innocenti-Brown-2011
GRHL3	COLQ	0.0268075	Co-expression	Innocenti-Brown-2011
NFATC4	COLQ	0.0153945	Co-expression	Innocenti-Brown-2011
SNRPF	HSPE1	0.0161711	Co-expression	Innocenti-Brown-2011
SNRPE	SSBP1	0.00812331	Co-expression	Innocenti-Brown-2011
SNRPE	SNRPF	0.00625477	Co-expression	Innocenti-Brown-2011
SNRPG	SSBP1	0.00713629	Co-expression	Innocenti-Brown-2011
SNRPG	HSPE1	0.00454866	Co-expression	Innocenti-Brown-2011
SNRPG	SNRPF	0.00537586	Co-expression	Innocenti-Brown-2011
SNRPG	SNRPE	0.00179543	Co-expression	Innocenti-Brown-2011
TRPM5	MUC6	0.0293657	Co-expression	Innocenti-Brown-2011
ZSCAN12	COLQ	0.0187701	Co-expression	Innocenti-Brown-2011
HSPD1	HSPE1	0.0287094	Co-expression	Innocenti-Brown-2011
SOX8	ELFN1	0.00972402	Co-expression	Innocenti-Brown-2011
FBLN7	AMBN	0.0162489	Co-expression	Innocenti-Brown-2011
STON2	ZSCAN12	0.0201663	Co-expression	Innocenti-Brown-2011
PAX7	UMOD	0.00900012	Co-expression	Innocenti-Brown-2011
PAX7	FOXL1	0.0129567	Co-expression	Innocenti-Brown-2011
IRX1	UMOD	0.00805586	Co-expression	Innocenti-Brown-2011
FOXB1	ELFN1	0.00651593	Co-expression	Innocenti-Brown-2011
FOXB1	SOX8	0.0169074	Co-expression	Innocenti-Brown-2011
HSPE1	SSBP1	0.00745093	Co-expression	Ramaswamy-Golub-2001
SNRPG	SSBP1	0.00945277	Co-expression	Ramaswamy-Golub-2001
SNRPG	SNRPF	0.0094594	Co-expression	Ramaswamy-Golub-2001
HSPD1	SSBP1	0.00768538	Co-expression	Ramaswamy-Golub-2001
HSPD1	HSPE1	0.0138738	Co-expression	Ramaswamy-Golub-2001
HSPE1	SSBP1	0.00887476	Co-expression	Jiang-de Kok-2017
PPIAL4A	SSBP1	0.0148095	Co-expression	Jiang-de Kok-2017
PPIAL4A	HSPE1	0.0139122	Co-expression	Jiang-de Kok-2017
GRHL3	COLQ	0.00467974	Co-expression	Jiang-de Kok-2017
SNRPF	SSBP1	0.0160785	Co-expression	Jiang-de Kok-2017
SNRPF	HSPE1	0.0136907	Co-expression	Jiang-de Kok-2017
SNRPG	SSBP1	0.0111018	Co-expression	Jiang-de Kok-2017
SNRPG	HSPE1	0.00839161	Co-expression	Jiang-de Kok-2017
SNRPG	PPIAL4A	0.0167263	Co-expression	Jiang-de Kok-2017
SNRPG	SNRPF	0.0159089	Co-expression	Jiang-de Kok-2017
FAM111B	HSPE1	0.00537763	Co-expression	Jiang-de Kok-2017
TRPM5	MUC6	0.0142465	Co-expression	Jiang-de Kok-2017
TAL2	AMBN	0.0157888	Co-expression	Jiang-de Kok-2017
TAL2	COLQ	0.00847557	Co-expression	Jiang-de Kok-2017
SOX8	ELFN1	0.0154175	Co-expression	Jiang-de Kok-2017
PAX7	MUC6	0.0119924	Co-expression	Jiang-de Kok-2017
FOXB1	ELFN1	0.0139266	Co-expression	Jiang-de Kok-2017
FOXB1	SOX8	0.0145127	Co-expression	Jiang-de Kok-2017
HSPE1	SSBP1	0.00721103	Co-expression	Bild-Nevins-2006 B
NFATC4	RAMP2	0.0184238	Co-expression	Bild-Nevins-2006 B
SNRPF	HSPE1	0.00908221	Co-expression	Bild-Nevins-2006 B
SNRPG	SSBP1	0.00721598	Co-expression	Bild-Nevins-2006 B
SNRPG	HSPE1	0.00856627	Co-expression	Bild-Nevins-2006 B
SNRPG	SNRPF	0.0101119	Co-expression	Bild-Nevins-2006 B
HSPD1	HSPE1	0.0218862	Co-expression	Bild-Nevins-2006 B
HSPD1	SNRPF	0.0179606	Co-expression	Bild-Nevins-2006 B
HSPD1	SNRPG	0.0105145	Co-expression	Bild-Nevins-2006 B
PAX7	COLQ	0.003316	Co-expression	Bild-Nevins-2006 B
ELFN1	RAMP2	0.00564986	Co-expression	Arijs-Rutgeerts-2009
SNRPG	SNRPE	0.0109985	Co-expression	Arijs-Rutgeerts-2009
TAL2	TRPM5	0.02179	Co-expression	Arijs-Rutgeerts-2009
HSPD1	HSPE1	0.0104979	Co-expression	Arijs-Rutgeerts-2009
UMOD	MUC6	0.00346049	Co-expression	Wang-Maris-2006
SNRPF	SSBP1	0.00637076	Co-expression	Wang-Maris-2006
SNRPF	HSPE1	0.00379919	Co-expression	Wang-Maris-2006
SNRPE	SNRPF	0.00890012	Co-expression	Wang-Maris-2006
SNRPG	SSBP1	0.00998928	Co-expression	Wang-Maris-2006
SNRPG	HSPE1	0.00602781	Co-expression	Wang-Maris-2006
SNRPG	SNRPF	0.00330288	Co-expression	Wang-Maris-2006
SNRPG	SNRPE	0.0109616	Co-expression	Wang-Maris-2006
ZSCAN12	UMOD	0.0085529	Co-expression	Wang-Maris-2006
HSPD1	HSPE1	0.00590885	Co-expression	Wang-Maris-2006
HSPD1	SNRPF	0.00292045	Co-expression	Wang-Maris-2006
HSPD1	SNRPE	0.0101462	Co-expression	Wang-Maris-2006
PAX7	MUC6	0.00298389	Co-expression	Wang-Maris-2006
PAX7	UMOD	0.00191703	Co-expression	Wang-Maris-2006
PAX7	ZSCAN12	0.00670255	Co-expression	Wang-Maris-2006
LMAN1	HAS3	0.00085431	Genetic Interactions	Lin-Smith-2010
UMOD	LRP5	0.00134535	Genetic Interactions	Lin-Smith-2010
UMOD	COLQ	0.00100609	Genetic Interactions	Lin-Smith-2010
FOXL1	COLQ	0.00091019	Genetic Interactions	Lin-Smith-2010
SNRPE	GRHL3	0.00308016	Genetic Interactions	Lin-Smith-2010
SNRPG	HSPE1	0.00119495	Genetic Interactions	Lin-Smith-2010
ZSCAN12	COLQ	0.00202546	Genetic Interactions	Lin-Smith-2010
ZSCAN12	HSPE1	0.00379007	Genetic Interactions	Lin-Smith-2010
FBLN7	LMAN1	0.00047052	Genetic Interactions	Lin-Smith-2010
FBLN7	FOXL1	0.00070281	Genetic Interactions	Lin-Smith-2010
FBLN7	SNRPE	0.0013148	Genetic Interactions	Lin-Smith-2010
PAX7	HAS3	0.0020535	Genetic Interactions	Lin-Smith-2010
PAX7	FOXL1	0.00135517	Genetic Interactions	Lin-Smith-2010
IRX1	HAS3	0.00077738	Genetic Interactions	Lin-Smith-2010
IRX1	COLQ	0.00055449	Genetic Interactions	Lin-Smith-2010
IRX1	LMAN1	0.00034346	Genetic Interactions	Lin-Smith-2010
IRX1	SNRPG	0.00035993	Genetic Interactions	Lin-Smith-2010
FOXB1	AMBN	0.00092903	Genetic Interactions	Lin-Smith-2010
FOXB1	LRP5	0.00123919	Genetic Interactions	Lin-Smith-2010
FOXB1	LMAN1	0.00057401	Genetic Interactions	Lin-Smith-2010
Figure 8 A-B	Reported in figure
Figure 8C	Reported in figure
Figure 9A	Not applicable
Figure 9B-C	Liver hepatocellular carcinoma
Gene list	p-value	Rank	ID	Original P value	Critical Value	Benjamini-Hochberg Adjusted P value	Significant using an FDR of 0.05?
AMBN	No data	1	ELFN1	0.01	0.025	0.02	Yes
COLQ	No data	2	RUVBL2	0.01	0.05	0.01	Yes
ELFN1	0.01
HAS3	No data
HSPE1	No data
LMAN1	No data
LRP5	No data
MUC6	No data
RAMP2	No data
RUVBL2	0.01
SSBP1	No data
UMOD	No data
Bonferroni Correction for Figures 5-6 (optional additional test)		https://www.statology.org/bonferroni-correction-calculator/
Bonferroni correction for Spearman		a=0.05, 12 comparisons, p-value must be below adjusted α: 4.17E-03
AMBN	1.81e-05	Yes
COLQ	5.34e-13	Yes
ELFN1	1.21e-20	Yes
HAS3	6.04e-10	Yes
HSPE1	1.07e-08	Yes
LMAN1	7.17e-05	Yes
LRP5	1.48e-09	Yes
MUC6	8.12e-09	Yes
RAMP2	3.38e-06	Yes
RUVBL2	1.04e-09	Yes
SSBP1	3.78e-13	Yes
UMOD	No data	No data
		a=0.05, 12 comparisons, p-value must be below adjusted α: 4.17E-03
AMBN	2.211e-05	Yes
COLQ	3.59e-11	Yes
ELFN1	4.35e-16	Yes
HAS3	2.53e-11	Yes
HSPE1	1.07e-10	Yes
LMAN1	3.84e-05	Yes
LRP5	3.6e-08	Yes
MUC6	3.8e-08	Yes
RAMP2	7e-07	Yes
RUVBL2	6.96e-08	Yes
SSBP1	5.5e-14	Yes
UMOD	No data	No data
[truncated: 10 more columns]
